# Supplementary material for: Benchmarking of Methods for DNA Methylome Deconvolution
Source: Research Square preprint supplement (doi:10.21203/rs.3.rs-3470543/v1), 2023-10-31
Supplement: Supplementary file 1 [file 0c1264883fb37bd60259f7d9.xlsx]

## Sheet: Tissues_450k
	None	Z-score	Min-max	Column Z-score	Column min-max	Quantile normalization	Log
EMeth-Normal	0.687013846790206	0.756843610066277	0.681826421645281	0.771631041859752	0.694793270299388	0.694617647769298	0.375091181077639
EMeth-Laplace	0.722114789440742	0.751714655364363	0.722347533033507	0.765336315230556	0.730166239901451	0.728305125940516	0.714810067393295
EMeth-Binomial	0.695460990446784	0.744501136567985	0.690014155946324	0.760831877493008	0.70306690628805	0.701920201249468	0.370248493256314
NNLS	0.690573491129676	0.689929028536547	0.690835256670446	0.709533041338487	0.695616587048343	0.714514217072194	0.538397887721106
BVLS	0.690573491129676	0.689929028536547	0.690858868264847	0.709533041338487	0.695616587048343	0.714514217072194	0.538397887721106
EpiDISH	0.719526454724423	0.719526454724423	0.719526454724423	0.743705151249755	0.721058052092978	0.743966291742462	0.692652214257083
Minfi	0.690420580787293	0.689824854504769	0.690829926524811	0.709544218895059	0.69558600186523	0.714441312969558	0.537520203163931
MethylResolver	0.744121816830014	0.743313809359953	0.743402115804514	0.76124306029043	0.744450796854404	0.754501270686943	0.719130879243172
Meth atlas	0.695310723451699	0.702343490018936	0.695519277287633	0.724834482289389	0.700890723319916	0.718754632326462	0.542384017442324
OLS	0.697994127596796	0.704864966600186	0.698245896821569	0.727607258532585	0.703664135546413	0.720710634253358	0.549140204221156
Ridge	0.675504881341974	0.675504881341974	0.675504881341974	0.707743935157992	0.677415640531896	0.712714463261114	0.545101176602934
Lasso	0.678328473857598	0.678328473857598	0.678328473857598	0.704554797880203	0.679502194581742	0.711238396013047	0.539676077799213
Elastic net	0.678696635583285	0.678696635583285	0.678696635583285	0.705192687222968	0.68003124629455	0.711658747360303	0.540758015087615

## Sheet: IC_in_silico_450k
	None	Z-score	Min-max	Column Z-score	Column min-max	Quantile normalization	Log
EMeth-Normal	0.734738622133218	0.665114914813347	0.737252444879317	0.662092696185111	0.723401492800545	0.733400855270542	0.41434929644208
EMeth-Laplace	0.691951344520069	0.672119243481751	0.69243331315075	0.671171726939403	0.688968050213914	0.703688674599958	0.567039606219732
EMeth-Binomial	0.638193161932847	0.65237011453275	0.639700195372796	0.644063422007463	0.623932066864093	0.639194422523223	0.344859341253018
NNLS	0.764849896371712	0.767375601480772	0.764281818287198	0.767262942144675	0.761629900962358	0.768183536420411	0.270480485177482
BVLS	0.764849896371712	0.767375601480772	0.764281818287198	0.767262942144675	0.761629900962358	0.768183536420411	0.270480485177482
EpiDISH	0.747315678759376	0.747315678759376	0.747315678759376	0.747315678759376	0.74586991733689	0.75250866382653	0.674682640281825
Minfi	0.764842955101791	0.767381515362199	0.764287197884614	0.767271099795734	0.761636271691824	0.768189195805893	0.270487592722755
MethylResolver	0.796214858615097	0.796082009210384	0.796561905612925	0.791434703600194	0.793146875147741	0.795559071975588	0.615037828345275
Meth atlas	0.765335486961854	0.767860301254897	0.764769026148096	0.768133444256775	0.76223198758134	0.769036046861187	0.269769693695265
OLS	0.764217854868041	0.766903424392405	0.763671494435959	0.767381563166319	0.761211515569485	0.769178435730207	0.269295830903053
Ridge	0.776898117406687	0.776898117406687	0.776898117406687	0.776013204598528	0.774382441642282	0.776954330886981	0.363032160072332
Lasso	0.771094279704272	0.771094279704272	0.771094279704272	0.770803015078914	0.768735441994726	0.773039349060175	0.373797979534841
Elastic net	0.771237383421676	0.771237383421676	0.771237383421676	0.770929372584413	0.768782252830842	0.773140071881416	0.373894865751869

## Sheet: IC_FACS_450k
	None	Z-score	Min-max	Column Z-score	Column min-max	Quantile normalization	Log
EMeth-Normal	0.291097715855855	0.648776177287572	0.301954432698524	0.655164767266973	0.282709848772686	0.289573718414203	0.20756398057033
EMeth-Laplace	0.703402484636673	0.602220430010146	0.703127708120063	0.601703771932241	0.708755445968412	0.681544937785756	0.471886925270119
EMeth-Binomial	0.25991939607344	0.590274832012233	0.263600996600881	0.602623856596956	0.256366747679237	0.252223817135839	0.218942403663379
NNLS	0.713691619116989	0.682483992646713	0.710543937256969	0.677955374830411	0.714196207097142	0.694039628915781	0.57304081352368
BVLS	0.713691619116989	0.682483992646713	0.710543937256969	0.677955374830411	0.714196207097142	0.694039628915781	0.57304081352368
EpiDISH	0.752779696876044	0.752779696876044	0.752779696876044	0.752779696876044	0.755066865618896	0.742411222253035	0.683607113531415
Minfi	0.713691619116989	0.682476089758706	0.710543937256969	0.6779441845601	0.714209813211658	0.694056216190585	0.572447078292802
MethylResolver	0.550305457198386	0.547846843765947	0.544183793083679	0.545650987144961	0.536917754411545	0.562142400688549	0.475974473197656
Meth atlas	0.7126187821631	0.681004965232135	0.709874185934403	0.674490215952606	0.712917308138445	0.693844729219999	0.572853546695419
OLS	0.716367483471895	0.683978840272249	0.713545523898558	0.677127000602576	0.716760388834303	0.695820013343649	0.572085894709053
Ridge	0.790703155922575	0.790703155922575	0.790703155922575	0.789865782908408	0.792814478664832	0.774801215544087	0.590710573102593
Lasso	0.772964237262303	0.772964237262303	0.772964237262303	0.774081405281634	0.775203522188333	0.757944134745241	0.637542705076606
Elastic net	0.77306911357849	0.77306911357849	0.77306911357849	0.774681908342737	0.775490370037889	0.757699270268466	0.636549401358535

## Sheet: IC_in_silico_850k
	None	Z-score	Min-max	Column Z-score	Column min-max	Quantile normalization	Log
EMeth-Normal	0.937779618204738	0.971733734370397	0.947794031427461	0.967277289347771	0.94699357323142	0.92370124023705	0.46553471363998
EMeth-Laplace	0.970346419522783	0.971991294807024	0.970224263045069	0.966063965455615	0.970335420809405	0.950301733199043	0.734477039660701
EMeth-Binomial	0.929261037144165	0.968931126656347	0.942831036883061	0.966615012295601	0.941836453112669	0.916456003149637	0.45262885694734
NNLS	0.969416445811433	0.962551810043646	0.968867300010171	0.961606663440056	0.968312602249437	0.949985753586404	0.776010773416882
BVLS	0.969416445811433	0.962551810043646	0.968867300010171	0.961606663440056	0.968312602249437	0.949985753586404	0.776010773416882
EpiDISH	0.968565633284333	0.968565633284333	0.968565633284333	0.962012908795884	0.968455861716095	0.945843174721825	0.717876864092829
Minfi	0.969414966614307	0.962551294044998	0.968866251888002	0.961613230298868	0.968312446606008	0.949982974198303	0.776010773416882
MethylResolver	0.967352698613606	0.967662784942788	0.967654888040269	0.960856966050292	0.967269864329328	0.946647327814499	0.792113819792097
Meth atlas	0.96979701361512	0.96771285394278	0.969251684367625	0.961944147701054	0.9686948261192	0.949940865006395	0.777731370742395
OLS	0.969744301058883	0.967563757064837	0.969189018801569	0.96189829638181	0.968601231432312	0.949971295990691	0.777731370742395
Ridge	0.967951496009107	0.967951496009107	0.967951496009107	0.962171826718341	0.968038554692963	0.945571487718473	0.712941234724717
Lasso	0.965068377039292	0.965068377039292	0.965068377039292	0.958964762176585	0.96519580411744	0.942246083692558	0.738250630092131
Elastic net	0.96520722399381	0.96520722399381	0.96520722399381	0.959101169101906	0.965321860301497	0.942423000468762	0.736762860774498

## Sheet: IC_in_silico_10_850k
	None	Z-score	Min-max	Column Z-score	Column min-max	Quantile normalization	Log
EMeth-Normal	0.912973252799124	0.90325849478895	0.912770532537172	0.897384941761249	0.914101483700664	0.915612374650824	0.381352313063671
EMeth-Laplace	0.914480858289246	0.915143347943779	0.917165154476475	0.916029702629429	0.9151747776094	0.907572432522262	0.604528373872298
EMeth-Binomial	0.908610148433919	0.887197908500618	0.911085920863254	0.897540476638411	0.912211936004801	0.909832763155772	0.379411192425055
NNLS	0.864165377497874	0.858198308699819	0.864383426021004	0.870342624745733	0.865110536762107	0.873029235527157	0.608874311070336
BVLS	0.864165377497874	0.858198308699819	0.864383426021004	0.870342624745733	0.865110536762107	0.873029235527157	0.608874311070336
EpiDISH	0.898981444486555	0.898981444486555	0.898981444486555	0.900745639649016	0.89910124427396	0.895266719954838	0.700386253823934
Minfi	0.864183943749767	0.858113042526374	0.864371611878027	0.870279037315072	0.865071792458119	0.873000078259715	0.608874311070336
Meth atlas	0.865294907432561	0.865150962908699	0.865491146648835	0.870780714696732	0.866010522985822	0.872443506126567	0.605954052444921
OLS	0.86375446667459	0.86345867959529	0.863896256241154	0.869483379013721	0.864336112938703	0.871874767870404	0.605954052444921
Ridge	0.856489392394654	0.856489392394654	0.856489392394654	0.860785479433583	0.856618285347965	0.868343696237582	0.693749871172087
Lasso	0.851530653588486	0.851530653588486	0.851530653588486	0.854248848081892	0.851599684516987	0.861928233909617	0.629251588900369
Elastic net	0.851481718036801	0.851481718036801	0.851481718036801	0.854295177131625	0.851587108135775	0.861918150456956	0.629116437750028

## Sheet: IC_in_silico_850k_using_450k
	None	Z-score	Min-max	Column Z-score	Column min-max	Quantile normalization	Log
EMeth-Normal	0.96533807150815	0.777261677775047	0.968032833414274	0.920014338722684	0.968208797669583	0.963108288581909	0.660762743897508
EMeth-Laplace	0.976597831251189	0.925217156560022	0.976510090698986	0.940197473681018	0.97531449225556	0.964408330313161	0.864324244617343
EMeth-Binomial	0.957020940093197	0.356307701088893	0.962892985914066	0.308001987758791	0.962154460864191	0.957644249008056	0.686068102027449
NNLS	0.968489077252136	0.884952526946502	0.968036690289681	0.926570163248712	0.967760060136365	0.956806193177125	0.841635562119741
BVLS	0.968489077252136	0.884952526946502	0.968036690289681	0.926570163248712	0.967760060136365	0.956806193177125	0.841635562119741
EpiDISH	0.974082345060476	0.974082345060476	0.974082345060476	0.973922367298319	0.974302862033589	0.962872967776802	0.855336546163734
Minfi	0.968470542619183	0.884375793330185	0.968028547041831	0.925223330921374	0.967776929737693	0.956788200977789	0.841635562119741
MethylResolver	0.978329798802113	0.978409299831337	0.978382991460798	0.977434079725751	0.978501800946842	0.966949338358356	0.833887570012564
Meth atlas	0.968902454000984	0.887957546222038	0.968433227382745	0.92593630014027	0.968252822079889	0.956553745888011	0.841695780813329
OLS	0.968380348120884	0.892570917449607	0.967843555638709	0.930465043757158	0.967637157744848	0.956101548730178	0.841695780813329
Ridge	0.971961650340582	0.971961650340582	0.971961650340582	0.971461288001271	0.972245755706323	0.959380282397212	0.802579007905846
Lasso	0.967671995550413	0.967671995550413	0.967671995550413	0.968114017878249	0.968021052129151	0.957056469085624	0.838619310275125
Elastic net	0.96803626361806	0.96803626361806	0.96803626361806	0.968452456075487	0.968378414892543	0.957275918053159	0.83731148885611

## Sheet: IC_in_vitro_850k
	None	Z-score	Min-max	Column Z-score	Column min-max	Quantile normalization	Log
EMeth-Normal	0.972415619825176	0.981387000116453	0.972415619825176	0.980271435823986	0.97390801645232	0.965729811915542	0.526492223966593
EMeth-Laplace	0.984770100264319	0.975369768033301	0.984770100264319	0.978837859823682	0.983588602970131	0.973082293916298	0.842815528837365
EMeth-Binomial	0.968293674235652	0.977213618561807	0.968293674235652	0.980813281983288	0.970575516292916	0.960896234183348	0.581285633850808
NNLS	0.981100202324597	0.964464960707069	0.981100202324597	0.975179042619593	0.981291505863642	0.968800518169388	0.836739182885895
BVLS	0.981100202324597	0.964464960707069	0.981100202324597	0.975179042619593	0.981291505863642	0.968800518169388	0.836739182885895
EpiDISH	0.981897423436898	0.981897423436898	0.981897423436898	0.979602303146079	0.981897423436898	0.977309868340699	0.798871643562032
Minfi	0.981100202324597	0.964464960707069	0.981100202324597	0.975179042619593	0.981291505863642	0.968800518169388	0.836739182885895
MethylResolver	0.982120703368089	0.982726876849873	0.98106832021454	0.981387164626617	0.981546606258909	0.977500802003856	0.878739249668696
Meth atlas	0.981514716896384	0.972923541268502	0.981514716896384	0.977819066218461	0.981514716896384	0.968832200318531	0.845151609774564
OLS	0.981514716896384	0.972923541268502	0.981514716896384	0.977819066218461	0.981514716896384	0.968832200318531	0.845151609774564
Ridge	0.975592304586482	0.975592304586482	0.975592304586482	0.973558629564704	0.975751274808329	0.969813579432016	0.773613499098569
Lasso	0.979251896250589	0.979251896250589	0.979251896250589	0.97756445070251	0.979156341612339	0.972732123113322	0.790292717612277
Elastic net	0.97906079163639	0.97906079163639	0.97906079163639	0.977087135970871	0.979124491102322	0.972732821984993	0.789548912742782

## Sheet: IC_in_vitro_850k_using_450k
	None	Z-score	Min-max	Column Z-score	Column min-max	Quantile normalization	Log
EMeth-Normal	0.976927257929176	0.979729029359457	0.976927257929176	0.975433347315471	0.978072952240153	0.970512095528983	0.638430805803963
EMeth-Laplace	0.976068427811734	0.971208857592388	0.976068427811734	0.971921306779357	0.973716533135025	0.970701367668931	0.921891375717476
EMeth-Binomial	0.975019903942465	0.979044683961006	0.975019903942465	0.977882725277784	0.978344126729619	0.971622258062125	0.645057647001323
NNLS	0.976195638072135	0.973524606594436	0.976195638072135	0.973508725862382	0.975559669660814	0.97250990588227	0.853873783630766
BVLS	0.976195638072135	0.973524606594436	0.976195638072135	0.973508725862382	0.975559669660814	0.97250990588227	0.853873783630766
EpiDISH	0.97462068991918	0.97462068991918	0.97462068991918	0.974525353844707	0.97462068991918	0.970668161539907	0.903074309798176
Minfi	0.976562021543892	0.972986116747102	0.976562021543892	0.972875685929739	0.975449030784356	0.97250990588227	0.853873783630766
MethylResolver	0.971495350225978	0.970829220069985	0.970670651324066	0.973780959422537	0.968863882985708	0.966868886672935	0.932522386561982
Meth atlas	0.976513699987813	0.976800000006631	0.976513699987813	0.974811376057278	0.976640939259953	0.973843590047661	0.879765443899875
OLS	0.974701441018898	0.975368919546626	0.974701441018898	0.973381684668998	0.975051044134987	0.972922615230256	0.879765443899875
Ridge	0.971527076407964	0.971527076407964	0.971527076407964	0.969782905678377	0.970068208201202	0.967279279660726	0.80330829033205
Lasso	0.974253066803487	0.974253066803487	0.974253066803487	0.973522355187161	0.974030647292356	0.970954849271755	0.840099104369263
Elastic net	0.973415261165708	0.973415261165708	0.973415261165708	0.972272317243832	0.973415261165708	0.97174821095379	0.839066833346625

## Sheet: IC_in_silico_WGBS_regions
	Z-score	Min-max	Column min-max	None	Column Z-score	Quantile normalization	Log
Meth atlas	0.842500012063208	0.841791251448756	0.841791251448756	0.841791251448756	0.822468350133389	0.804612074728145	0.693667684307366
OLS	0.842500012063208	0.841791251448756	0.841791251448756	0.841791251448756	0.822468350133389	0.804612074728145	0.693667684307366
EpiDISH	0.840609046340746	0.840609046340746	0.840609046340746	0.840609046340746	0.822068582173529	0.806544532576037	0.754116597922376
EMeth-Laplace	0.825602765801106	0.82571968025363	0.82571968025363	0.82571968025363	0.804533239956313	0.781195260673201	0.608988193971053
NNLS	0.836824962935809	0.841632328535776	0.841632328535776	0.841632328535776	0.816455930788982	0.804162937650365	0.682585997154273
BVLS	0.836824962935809	0.841632328535776	0.841632328535776	0.841632328535776	0.816455930788982	0.804162937650365	0.682585997154273
Minfi	0.836824962935809	0.841632328535776	0.841632328535776	0.841632328535776	0.816455930788982	0.804162937650365	0.682585997154273
Lasso	0.78427108383276	0.78427108383276	0.78427108383276	0.78427108383276	0.769242913293018	0.760931650793506	0.618298448013721
Elastic net	0.784137922821348	0.784137922821348	0.784137922821348	0.784137922821348	0.769331117571727	0.760916336774993	0.618089299646132
MethylResolver	0.711586460614874	0.731821200139588	0.721273259424175	0.71449933631821	0.704538076896769	0.640970681583335	0.689209948493658
EMeth-Normal	0.833404733576117	0.695973499323851	0.695973499323851	0.695973499323851	0.766128962776354	0.63179593158532	0.350295849133932
EMeth-Binomial	0.821504393399701	0.662236929262547	0.662236929262547	0.662236929262547	0.74854828150443	0.605813694167897	0.350477314637862
Ridge	0.804480597325529	0.804480597325529	0.804480597325529	0.804480597325529	0.792815250219299	0.786739814393889	0.663677291896934

## Sheet: IC_in_silico_WGBS_cpgs
	None	Z-score	Min-max	Column Z-score	Column min-max	Quantile normalization	Log
EMeth-Normal	0.695973499323851	0.833404733576117	0.695973499323851	0.766128962776354	0.695973499323851	0.63179593158532	0.350295849133932
EMeth-Laplace	0.82571968025363	0.825602765801106	0.82571968025363	0.804533239956313	0.82571968025363	0.781195260673201	0.608988193971053
EMeth-Binomial	0.662236929262547	0.821504393399701	0.662236929262547	0.74854828150443	0.662236929262547	0.605813694167897	0.350477314637862
NNLS	0.841632328535776	0.836824962935809	0.841632328535776	0.816455930788982	0.841632328535776	0.804162937650365	0.682585997154273
BVLS	0.841632328535776	0.836824962935809	0.841632328535776	0.816455930788982	0.841632328535776	0.804162937650365	0.682585997154273
EpiDISH	0.840609046340746	0.840609046340746	0.840609046340746	0.822068582173529	0.840609046340746	0.806544532576037	0.754116597922376
Minfi	0.841632328535776	0.836824962935809	0.841632328535776	0.816455930788982	0.841632328535776	0.804162937650365	0.682585997154273
MethylResolver	0.71449933631821	0.711586460614874	0.731821200139588	0.704538076896769	0.721273259424175	0.640970681583335	0.689209948493658
Meth atlas	0.841791251448756	0.842500012063208	0.841791251448756	0.822468350133389	0.841791251448756	0.804612074728145	0.693667684307366
OLS	0.841791251448756	0.842500012063208	0.841791251448756	0.822468350133389	0.841791251448756	0.804612074728145	0.693667684307366
Ridge	0.804480597325529	0.804480597325529	0.804480597325529	0.792815250219299	0.804480597325529	0.786739814393889	0.663677291896934
Lasso	0.78427108383276	0.78427108383276	0.78427108383276	0.769242913293018	0.78427108383276	0.760931650793506	0.618298448013721
Elastic net	0.784137922821348	0.784137922821348	0.784137922821348	0.769331117571727	0.784137922821348	0.760916336774993	0.618089299646132

[truncated: 2 more sheets: IC_in_silico_850k_2_500, IC_in_silico_WGBS_2_500]
