# Supplementary material for: Benchmarking of Methods for DNA Methylome Deconvolution
Source: Research Square preprint supplement (doi:10.21203/rs.3.rs-3470543/v1), 2023-10-31
Supplement: Supplementary file 2 [file 26d5f3e3bc7e0e246bd4f3cf.xlsx]

## Sheet: Tissues_450k
	None	Z-score	Min-max	Column Z-score	Column min-max	Quantile normalization	Log
EMeth-Normal	0.113362358978813	0.0986556113661094	0.114974789587068	0.0864089682371346	0.112823041213433	0.101056979230452	0.186932581103615
EMeth-Laplace	0.102194795809072	0.0983050042086907	0.102224644163847	0.093651552660674	0.10176493423702	0.0917496789089661	0.115851517928212
EMeth-Binomial	0.110636146052191	0.103352565179715	0.112307701344176	0.0887190156588432	0.110698203226911	0.097723609310679	0.182842068668407
NNLS	0.10876392665979	0.104981123204012	0.109447577996767	0.0937944295240431	0.108282480783163	0.0952533910140635	0.125844480969889
BVLS	0.10876392665979	0.104981123204012	0.109436574336363	0.0937944295240431	0.108282480783163	0.0952533910140637	0.125844480969889
EpiDISH	0.1059519746496	0.1059519746496	0.1059519746496	0.0987089620818178	0.105403585115147	0.0962173237052024	0.117670875190822
Minfi	0.108763926659791	0.104981123204012	0.109447577996768	0.093794429524043	0.108282480783164	0.0952533910140644	0.125844480969889
MethylResolver	0.108492056511204	0.109853339729473	0.109373328915797	0.0981634283069182	0.109221932450146	0.0968843305188468	0.122094326379138
Meth atlas	0.10545662768137	0.104767388285824	0.105468524271128	0.0982883981006465	0.10501535473799	0.0926880113257575	0.139076195336175
OLS	0.107521425527026	0.10690137559319	0.107542336514928	0.100605543870842	0.107144625392938	0.0936986734734712	0.142174346745503
Ridge	0.0931263313320172	0.0937352920818632	0.0934703099532056	0.083717285901682	0.0930056903550942	0.0825112492491759	0.114204121053277
Lasso	0.108448267408639	0.109676620300948	0.109153182502515	0.096596261090704	0.108901748115443	0.0940368714011543	0.124514899182083
Elastic net	0.10779628006801	0.109011510878299	0.108493523687893	0.0959806255976453	0.108236793304968	0.093437885764718	0.123961683906273

## Sheet: IC_in_silico_450k
	None	Z-score	Min-max	Column Z-score	Column min-max	Quantile normalization	Log
EMeth-Normal	0.0553622219179919	0.0570412680096782	0.0548234979330061	0.0573114454285327	0.056567266917399	0.0557806878543067	0.0821056881387021
EMeth-Laplace	0.054881209452905	0.0560478627463346	0.0548825737461515	0.056077912295734	0.0553090055039734	0.0538257459209903	0.0763056657170834
EMeth-Binomial	0.0691871821161113	0.0578763421992693	0.0686740304069961	0.0585816625377889	0.070830276610734	0.0699894365703524	0.0974089805850479
NNLS	0.0566623343488612	0.0495253828002805	0.0564022353194316	0.0494313899880686	0.0567284730572857	0.0560392637047623	0.0936929392844873
BVLS	0.056662334348861	0.0495253828002805	0.0564022353194316	0.0494313899880686	0.0567284730572857	0.0560392637047621	0.0936929392844873
EpiDISH	0.0508230778770773	0.0508230778770772	0.0508230778770772	0.0508230800960297	0.051052765594925	0.0502858054364568	0.058311915316729
Minfi	0.0566623343488619	0.0495253828002804	0.0564022353194319	0.0494313899880688	0.0567284730572855	0.0560392637047622	0.0936929392844876
MethylResolver	0.0487482307363559	0.0480274528322284	0.0484608174937172	0.0484179970180639	0.0488546333609293	0.0491307732099193	0.0896924531427981
Meth atlas	0.0497195307838141	0.0492426635559415	0.0497392155549677	0.049134271958029	0.0500043364290256	0.0492404989506962	0.098645829216566
OLS	0.0498300819467102	0.0493411825009461	0.0498466919061035	0.0492196349752456	0.0501084952762245	0.0492808620759689	0.0987448707154563
Ridge	0.0516799179042607	0.0502501127862303	0.0513046244960488	0.0502084978399024	0.0514764598500794	0.0512952229715408	0.0790919965528125
Lasso	0.0555114814806949	0.0493581913458113	0.0549110313347488	0.0492923626278156	0.055012072370323	0.0549004686228856	0.0816338093559416
Elastic net	0.0553884058506924	0.0493388504306064	0.0547925055715533	0.0492727253878769	0.0548940132489601	0.0547848332239653	0.0814683917929354

## Sheet: IC_FACS_450k
	None	Z-score	Min-max	Column Z-score	Column min-max	Quantile normalization	Log
EMeth-Normal	0.0741186333584857	0.0457066205421769	0.0727649593044317	0.0442202394974065	0.0738109740179323	0.0728520973212507	0.100763377459734
EMeth-Laplace	0.0431057391270887	0.0508051920362856	0.0432221586026402	0.0500921447968223	0.0426539721876467	0.0422254357679708	0.110785410867226
EMeth-Binomial	0.0765445400390453	0.0467827357801546	0.0752565861907449	0.0455021627013733	0.0773081010870188	0.0748007233678941	0.0989684355201019
NNLS	0.0697124498711338	0.0440376174097598	0.0679946302042021	0.0424587815410563	0.0681598448988782	0.0674252856732977	0.0706336124938493
BVLS	0.0697124498711337	0.0440376174097599	0.0679946302042021	0.0424587815410565	0.0681598448988782	0.067425285673298	0.0706336124938491
EpiDISH	0.044696144809204	0.0446961448092041	0.0446961448092041	0.0446961447112221	0.0448137557827097	0.0440196835196963	0.0433742198603166
Minfi	0.0697124498711321	0.04403761740976	0.0679946302042005	0.0424587815410563	0.068159844898875	0.0674252856732961	0.0706336124938491
MethylResolver	0.0916785137326663	0.105659903505349	0.0925309484293406	0.105863116514215	0.0931260621347823	0.0882428350564675	0.130016646716817
Meth atlas	0.0404431067955324	0.0430818271295078	0.0404459794795685	0.0418730070421409	0.0401719972791752	0.0394585544926233	0.0548243167586308
OLS	0.0400551412973923	0.0428080631735033	0.0400754229270187	0.0415904136326822	0.039799697338538	0.0392294715997134	0.0560987535293389
Ridge	0.0409391674046494	0.0450853930812303	0.0400219210996244	0.0446580354117083	0.040066501131883	0.0391415223040999	0.0658555997818494
Lasso	0.0579312542077665	0.0404145953385176	0.0560104992110394	0.0396757935782459	0.0561942768688636	0.0550086935499757	0.0507921741038883
Elastic net	0.057392572374297	0.040150175213277	0.0554783410792479	0.0394079431928126	0.0556576109713319	0.0544883095356293	0.0513535116330814

## Sheet: IC_in_silico_850k
	None	Z-score	Min-max	Column Z-score	Column min-max	Quantile normalization	Log
EMeth-Normal	0.0231283568224799	0.0166176663667668	0.0213130040677564	0.0179568037857934	0.0215520279051157	0.0261139867307851	0.13197475502962
EMeth-Laplace	0.0162858280532669	0.0159068212783705	0.0164180165098151	0.0176968309065808	0.0165614440009688	0.0215901197169277	0.0479634102784355
EMeth-Binomial	0.0245962176617893	0.0173233062539932	0.0222620568479405	0.018100423687534	0.0225364395909416	0.0272999156968174	0.117550630476951
NNLS	0.0172169611589984	0.0191264719403657	0.0171280908467274	0.0190026012197591	0.0172718322103432	0.0215810708193273	0.0556109817342283
BVLS	0.0172169611589984	0.0191264719403656	0.0171280908467274	0.0190026012197591	0.0172718322103432	0.0215810708193273	0.0556109817342283
EpiDISH	0.0175246827363513	0.0175246827363513	0.0175246827363513	0.0193010376719322	0.0175616338135492	0.0236146162715604	0.0497616290372706
Minfi	0.017216961158997	0.0191264719403655	0.0171280908467257	0.0190026012197592	0.0172718322103415	0.0215810708193269	0.0556109817342283
MethylResolver	0.0198088193970959	0.0186656886270593	0.0192707250985424	0.0203837142272847	0.0189312611792965	0.0248203434790649	0.0806831240366429
Meth atlas	0.0163417365150045	0.0171941255909904	0.0165373217158058	0.0189026402310428	0.0167750179851769	0.0215227342791033	0.0453633317499627
OLS	0.0163525687439136	0.0172221387731267	0.0165506178852261	0.0189130379449648	0.016790314599838	0.0215173000255449	0.0453633317499627
Ridge	0.0256251163737653	0.0193642788976042	0.024246193265332	0.0203429140299539	0.0235183684846832	0.0295872097179297	0.0589277554753244
Lasso	0.0209625358348442	0.0184764758086234	0.020092975050263	0.0197209789269688	0.019654198810676	0.02577272258818	0.0543611402288241
Elastic net	0.0209255614247083	0.0183821054308197	0.0200456838170379	0.0196250591034822	0.019601133722647	0.0257335643743241	0.0544636667731331

## Sheet: IC_in_silico_10_850k
	None	Z-score	Min-max	Column Z-score	Column min-max	Quantile normalization	Log
EMeth-Normal	0.0269329695102682	0.0310489710360191	0.0271654816047297	0.0311797563113572	0.0270601935891995	0.0268871579588618	0.0763112552012792
EMeth-Laplace	0.0271828976126647	0.0270605258792449	0.0268231470709677	0.0270246107765207	0.0272418612530441	0.0283693941580999	0.0615918878866604
EMeth-Binomial	0.0277490477423153	0.032945290797106	0.0274930645542239	0.031109445757667	0.0274237626151461	0.0277861536501559	0.0777165951592014
NNLS	0.034631691846585	0.036975523329061	0.0347651283437547	0.0350066445436696	0.0347996883311353	0.0330539182751413	0.0730363908050613
BVLS	0.034631691846585	0.036975523329061	0.0347651283437547	0.0350066445436696	0.0347996883311353	0.0330539182751413	0.0730363908050613
EpiDISH	0.0289519068006472	0.0289519068006473	0.0289519068006472	0.0287091093962311	0.028933008682306	0.0294712239798786	0.0525720439274389
Minfi	0.0346316918465856	0.036975523329061	0.0347651283437551	0.0350066445436697	0.034799688331135	0.0330539182751418	0.0730363908050613
Meth atlas	0.0350432598860213	0.0357727259332087	0.0351683291334362	0.0345186083039722	0.0352396030359223	0.0334680794314911	0.0600058318315005
OLS	0.0354037781271523	0.0363727811427188	0.0355455945924788	0.0349011426957391	0.0356320102529414	0.0336597922551699	0.0600058318315005
Ridge	0.0554388021850828	0.0504377887004898	0.054386687350223	0.050051896845594	0.0538851275338679	0.0544757586682923	0.115650253969226
Lasso	0.0397293775160916	0.0466504316993777	0.0408950601262063	0.0459858182343106	0.0414731275350171	0.0380593023469041	0.0817596854196254
Elastic net	0.0397088737415311	0.0466236571128253	0.0408731489875273	0.0459550338962005	0.041450592210753	0.038043419105886	0.0817650929611861

## Sheet: IC_in_silico_850k_using_k450
	None	Z-score	Min-max	Column Z-score	Column min-max	Quantile normalization	Log
EMeth-Normal	0.0181757721396053	0.053551198341441	0.0178102789189359	0.0316035729484544	0.0179197103778942	0.0183023095501688	0.0947594289103867
EMeth-Laplace	0.0156850951262891	0.0426662373671935	0.01599273005323	0.0400556252362168	0.0165777428506359	0.0189409569980714	0.0371465398850885
EMeth-Binomial	0.0199711320894957	0.101505181617068	0.0190243156306694	0.107931544462475	0.0192818283848645	0.019493201918295	0.0966568099797736
NNLS	0.0176955530674381	0.0435087215063955	0.0178154754657327	0.0383965077130484	0.0179605896962658	0.020343162353421	0.0451229951895964
BVLS	0.0176955530674381	0.0435087215063955	0.0178154754657327	0.0383965077130484	0.0179605896962658	0.0203431623534211	0.0451229951895963
EpiDISH	0.0164473807195543	0.0164473807195544	0.0164473807195543	0.0164917461625715	0.0163862632190976	0.0197921950328936	0.0381799607136587
Minfi	0.0176955530674341	0.0435087215063951	0.0178154754657271	0.0383965077130484	0.0179605896962672	0.0203431623534238	0.0451229951895963
MethylResolver	0.0153015828889599	0.0295905421890023	0.0154159176144034	0.0297304885540006	0.0154971852653928	0.0190002382430936	0.0641326524336744
Meth atlas	0.0176088265157735	0.047229873467342	0.0178784227691066	0.0410340055670426	0.0181052564958227	0.020689036621432	0.0397160013718878
OLS	0.0177435337189626	0.0491177322456983	0.0180272931065301	0.0425002597424155	0.018266021871742	0.0208737412082719	0.0397160013718878
Ridge	0.0208657071438873	0.0198465515883689	0.0196732202902978	0.0197632704064254	0.0191394461873095	0.0239292856530627	0.0518289505948365
Lasso	0.018494465540526	0.0280421320022172	0.0181658738634443	0.0278261021587763	0.0179628141590862	0.0214013796910882	0.0456472233192292
Elastic net	0.0183281882365961	0.0277152768150793	0.0179711312086054	0.0275055936742449	0.0177572791333754	0.0212863091291197	0.0458637955409443

## Sheet: IC_in_vitro_850k
	None	Z-score	Min-max	Column Z-score	Column min-max	Quantile normalization	Log
EMeth-Normal	0.0156389650993211	0.0128676065362583	0.0156389650993211	0.0130358278991053	0.0157979675645012	0.0204424879938058	0.149331380025087
EMeth-Laplace	0.0128428139414487	0.0181478695278516	0.0128428139414487	0.0143538807789722	0.0127851804450889	0.019164347197565	0.0518594773630278
EMeth-Binomial	0.0170941236886143	0.0136875201045692	0.0170941236886143	0.0127331125111015	0.0171836040014523	0.0213316684386453	0.118034461104594
NNLS	0.0134589893206125	0.0155029126136811	0.0134589893206125	0.0142877251081435	0.0137205663250311	0.0197864539739912	0.0782836665829347
BVLS	0.0134589893206126	0.0155029126136811	0.0134589893206126	0.0142877251081435	0.0137205663250311	0.019786453973991	0.0782836665829347
EpiDISH	0.0122583341742351	0.012258334174235	0.0122583341742351	0.0127306228411259	0.0123180321027893	0.0177906571779491	0.0689023507402203
Minfi	0.0134589893206123	0.0155029126136811	0.0134589893206123	0.0142877251081436	0.0137205663250292	0.0197864539739907	0.0782836665829348
MethylResolver	0.0125258604737231	0.0109349263459482	0.012753928494835	0.0119756968945341	0.0126831068032512	0.0191971468673433	0.0510935498748747
Meth atlas	0.0132119399761119	0.0184623833110295	0.0132119399761119	0.0150448654733096	0.0132743888001719	0.0193984049499105	0.0590116856981938
OLS	0.0132119399761119	0.0185062782535925	0.0132119399761119	0.0150448654733096	0.0132743888001719	0.0193984049499105	0.0590116856981941
Ridge	0.0289412639741262	0.0263457429587316	0.0289412639741262	0.0244455194187287	0.0292738621882794	0.0321658776358857	0.0875642327942785
Lasso	0.0146687092565001	0.0129632049822747	0.0146687092565001	0.0132998847710704	0.0149819293630088	0.0198766915644989	0.07766202749166
Elastic net	0.0148438855884099	0.0131042486484511	0.0148438855884099	0.0133444121851676	0.0151590014793632	0.0200340191356104	0.0779334107360888

## Sheet: IC_in_vitro_850k_using_k450
	None	Z-score	Min-max	Column Z-score	Column min-max	Quantile normalization	Log
EMeth-Normal	0.0155129014797964	0.0143112841133436	0.0155129014797964	0.0140978329859014	0.0153451301113353	0.0174927838642885	0.0871721149277874
EMeth-Laplace	0.0147745281547984	0.0158849373596115	0.0147745281547984	0.0149801131063952	0.0152914850198143	0.01761195128077	0.0369853752587491
EMeth-Binomial	0.0161096669394457	0.0142320501518551	0.0161096669394457	0.0139439964695931	0.0158677212708869	0.0177322732744155	0.0883973017253981
NNLS	0.0148469154600621	0.015182550151957	0.0148469154600621	0.014226893355241	0.014711315821568	0.0169508285265006	0.0727369413440873
BVLS	0.0148469154600619	0.0151825501519571	0.0148469154600619	0.0142268933552411	0.014711315821568	0.0169508285265006	0.0727369413440872
EpiDISH	0.0144165221526619	0.014416522152662	0.0144165221526619	0.0143483315755081	0.0143777938087273	0.016990306741875	0.0575186089077594
Minfi	0.0148469154600639	0.0151825501519571	0.0148469154600639	0.0142268933552414	0.0147113158215679	0.0169508285265002	0.072736941344087
MethylResolver	0.0155153253187221	0.0152721423184021	0.0154994884202777	0.0151165142059223	0.0159672648219904	0.0186908637680759	0.0457468667926108
Meth atlas	0.014209318329208	0.0153713771910779	0.014209318329208	0.0141694489682703	0.0141636458652282	0.0164822962896468	0.0612808870468054
OLS	0.0143701671347915	0.0154903803860613	0.0143701671347915	0.0143410499323616	0.0143261916978918	0.0165981870658262	0.0612808870468053
Ridge	0.0308263590676781	0.0294799423044051	0.0308263590676781	0.0281724149402008	0.0308527352035442	0.0325965702773559	0.0866317483543474
Lasso	0.0160240531806643	0.0151507012003351	0.0160240531806643	0.0143372405572546	0.0159650107332697	0.0179605420404176	0.0724999431574916
Elastic net	0.0161686416406061	0.0152710385877614	0.0161686416406061	0.0144284843194542	0.0161177684135	0.0181369938042981	0.0730496200996065

## Sheet: IC_in_silico_WGBS_regions
	Z-score	Min-max	Column min-max	None	Column Z-score	Quantile normalization	Log
Meth atlas	0.0378631089046058	0.0381187022052929	0.0381187022052929	0.0381187022052929	0.0396275606472184	0.0408234323942618	0.0499263012017968
OLS	0.0378631089046058	0.0381187022052929	0.0381187022052929	0.0381187022052929	0.0396275606472184	0.0408234323942618	0.0499263012017969
EpiDISH	0.0381124764977874	0.0381124764977874	0.0381124764977874	0.0381124764977874	0.0407338164793489	0.0429558256988867	0.053742478288367
EMeth-Laplace	0.0393666742797955	0.0392407563865652	0.0392407563865652	0.0392407563865652	0.0411163290894574	0.0429444484421448	0.071275752411154
NNLS	0.0378125250920467	0.0378833952321801	0.0378833952321801	0.0378833952321801	0.0400085419101392	0.0410346724379555	0.0967509242674416
BVLS	0.0378125250920467	0.0378833952321801	0.0378833952321801	0.0378833952321801	0.0400085419101393	0.0410346724379555	0.0967509242674416
Minfi	0.0378125250920466	0.0378833952321813	0.0378833952321813	0.0378833952321813	0.0400085419101394	0.0410346724379535	0.0967509242674416
Lasso	0.0529570735007913	0.0525700155610251	0.0525700155610251	0.0525700155610251	0.0529714373074046	0.0518786371722029	0.109879942562354
Elastic net	0.0529550939035216	0.0525680227870957	0.0525680227870957	0.0525680227870957	0.0529468212990743	0.0518798108058776	0.109893872719474
MethylResolver	0.0567228978239949	0.054429422462326	0.0548177661768265	0.0562308901422528	0.0556495567325602	0.0617839286001572	0.121882311886542
EMeth-Normal	0.038383710730362	0.0522336829845157	0.0522336829845157	0.0522336829845157	0.0434683168978751	0.0595938771565736	0.240236445237745
EMeth-Binomial	0.0393742723956312	0.0576694942830698	0.0576694942830698	0.0576694942830698	0.0449373551706316	0.0639772276147516	0.240235691467142
Ridge	0.0746120297839044	0.0741575732292227	0.0741575732292227	0.0741575732292227	0.0735614946621227	0.0710211862913911	0.121971523092729

## Sheet: IC_in_silico_WGBS_cpgs
	None	Z-score	Min-max	Column Z-score	Column min-max	Quantile normalization	Log
EMeth-Normal	0.0522336829845157	0.038383710730362	0.0522336829845157	0.0434683168978751	0.0522336829845157	0.0595938771565736	0.240236445237745
EMeth-Laplace	0.0392407563865652	0.0393666742797955	0.0392407563865652	0.0411163290894574	0.0392407563865652	0.0429444484421448	0.071275752411154
EMeth-Binomial	0.0576694942830698	0.0393742723956312	0.0576694942830698	0.0449373551706316	0.0576694942830698	0.0639772276147516	0.240235691467142
NNLS	0.0378833952321801	0.0378125250920467	0.0378833952321801	0.0400085419101392	0.0378833952321801	0.0410346724379555	0.0967509242674416
BVLS	0.0378833952321801	0.0378125250920467	0.0378833952321801	0.0400085419101393	0.0378833952321801	0.0410346724379555	0.0967509242674416
EpiDISH	0.0381124764977874	0.0381124764977874	0.0381124764977874	0.0407338164793489	0.0381124764977874	0.0429558256988867	0.053742478288367
Minfi	0.0378833952321813	0.0378125250920466	0.0378833952321813	0.0400085419101394	0.0378833952321813	0.0410346724379535	0.0967509242674416
MethylResolver	0.0562308901422528	0.0567228978239949	0.054429422462326	0.0556495567325602	0.0548177661768265	0.0617839286001572	0.121882311886542
Meth atlas	0.0381187022052929	0.0378631089046058	0.0381187022052929	0.0396275606472184	0.0381187022052929	0.0408234323942618	0.0499263012017968
OLS	0.0381187022052929	0.0378631089046058	0.0381187022052929	0.0396275606472184	0.0381187022052929	0.0408234323942618	0.0499263012017969
Ridge	0.0741575732292227	0.0746120297839044	0.0741575732292227	0.0735614946621227	0.0741575732292227	0.0710211862913911	0.121971523092729
Lasso	0.0525700155610251	0.0529570735007913	0.0525700155610251	0.0529714373074046	0.0525700155610251	0.0518786371722029	0.109879942562354
Elastic net	0.0525680227870957	0.0529550939035216	0.0525680227870957	0.0529468212990743	0.0525680227870957	0.0518798108058776	0.109893872719474

[truncated: 2 more sheets: IC_in_silico_850k_2_500, IC_in_silico_WGBS_2_500]
