# Supplementary material for: Benchmarking of Methods for DNA Methylome Deconvolution
Source: Research Square preprint supplement (doi:10.21203/rs.3.rs-3470543/v1), 2023-10-31
Supplement: Supplementary file 3 [file 8a318e091f3f2c17dc0c854b.xlsx]

## Sheet: Tissues_450k
	Blood	Kidney	Liver	Small_intestine
MIX1	0.26225387101131	0.249477992345587	0.192888357029428	0.295379779613675
MIX2	0.382822702455008	0.264850419342824	0.0474983251839797	0.304828553018189
MIX3	0.438740743715958	0.429820130504458	0.102935502492873	0.0285036232867107
MIX4	0.191932134003213	0.456170491880549	0.0141802911187875	0.337717082997451
MIX5	0.193022740887776	0.378862556278566	0.339909802913582	0.0882048999200758
MIX6	0.286377127010874	0.174026560761538	0.274029828220266	0.265566484007322
MIX7	0.07823386314	0.393533530950495	0.173334026008641	0.354898579900865
MIX8	0.157641294462738	0.416642956653228	0.421152471818694	0.00456327706534007
MIX9	0.22693276433295	0.50633154767864	0.190646753061649	0.0760889349267611
MIX10	0.139020407840339	0.337512450350743	0.236243960400037	0.287223181408881
MIX11	0.351688898872273	0.486174789473717	0.113450444409663	0.048685867244347
MIX12	0.0324770222056444	0.40955127920767	0.365792526000117	0.192179172586568
MIX13	0.114823548256807	0.337019680024788	0.218558378872629	0.329598392845775
MIX14	0.295399780284789	0.289449151348092	0.124351656607921	0.290799411759199
MIX15	0.272052980168873	0.186454800117876	0.0612639247678333	0.480228294945417
MIX16	0.299993773540143	0.396543181017196	0.254412795835358	0.0490502496073039
MIX17	0.431258855461358	0.258980982154109	0.0727591324959976	0.237001029888536
MIX18	0.340520107790347	0.327990894840545	0.131731318603097	0.199757678766011
MIX19	0.348160772362388	0.306268814573266	0.0779489199982323	0.267621493066113
MIX20	0.303043362485132	0.308075941129799	0.292491829137116	0.0963888672479533
MIX21	0.281675870713737	0.353795724927885	0.0326541683642425	0.331874235994135
MIX22	0.26865880449666	0.0379225893565329	0.248309681518284	0.445108924628524
MIX23	0.133169892335247	0.267129194655537	0.351830052136797	0.247870860872418
MIX24	0.529306840829992	0.335655551431613	0.127673905634638	0.00736370210375767
MIX25	0.3249557230933	0.0748909875981189	0.339258166917077	0.260895122391504
MIX26	0.135615266918949	0.329231144833077	0.255675229035514	0.279478359212461
MIX27	0.0900420815543458	0.197576514646733	0.428283198026365	0.284098205772556
MIX28	0.386648997021046	0.332712170727603	0.172206782668211	0.10843204958314
MIX29	0.077363630386532	0.260147893624274	0.347270508908754	0.315217967080441
MIX30	0.171311243710993	0.139145519800446	0.476626717087685	0.212916519400877
MIX31	0.32832271294113	0.206409465677039	0.274150888847763	0.191116932534067
MIX32	0.0546023731099598	0.157005289470112	0.390892577775957	0.397499759643971
MIX33	0.225949359075842	0.349228973357013	0.0957820355313504	0.329039632035794
MIX34	0.194578361792875	0.314928123782759	0.222312614484858	0.268180899939508
MIX35	0.235432699946903	0.0529861075581361	0.383323581592196	0.328257610902765
MIX36	0.216788764927133	0.278839939414947	0.20282971231464	0.30154158334328
MIX37	0.42400979782658	0.0209759194200395	0.465808517032521	0.0892057657208597
MIX38	0.304340962504709	0.445610043100732	0.0567718477276277	0.193277146666931
MIX39	0.230527816073465	0.268861561304404	0.101868559039621	0.39874206358251
MIX40	0.121216642803856	0.401614955695373	0.412314630551811	0.0648537709489609
MIX41	0.120237179706343	0.360065856544138	0.190376002668112	0.329320961081407
MIX42	0.224296603002403	0.160451353116291	0.113531937274185	0.501720106607121
MIX43	0.0697421756225658	0.401745114102744	0.222660626440877	0.305852083833812
MIX44	0.320776729492683	0.138725622675331	0.3336165168748	0.206881130957186
MIX45	0.0111891457657396	0.352344037964778	0.171040103283534	0.465426712985948
MIX46	0.102519094258863	0.56139941687776	0.131765939805032	0.204315549058345
MIX47	0.0973857686097367	0.424155062496847	0.166235433674619	0.312223735218797
MIX48	0.00162002963211546	0.372456131451817	0.466855425470473	0.159068413445595
MIX49	0.478897079590501	0.016609927010757	0.373179996466205	0.131312996932537
MIX50	0.325195233132085	0.186311067101787	0.19620076303886	0.292292936727268
MIX51	0.0764327512667684	0.397403728631978	0.455305426312851	0.0708580937884031
MIX52	0.196294257963709	0.0732725569457528	0.348781714299425	0.381651470791113
MIX53	0.190706396315457	0.145331321689265	0.452001805814955	0.211960476180323
MIX54	0.100856287611947	0.117066748605538	0.371691816413831	0.410385147368684
MIX55	0.0122885775884635	0.577197222974913	0.101683377711651	0.308830821724972
MIX56	0.217825648908489	0.272612096085864	0.430819349339663	0.0787429056659847
MIX57	0.228073425544792	0.173610442751324	0.334651921436125	0.263664210267758
MIX58	0.206848984751573	0.174436471261161	0.237853902220719	0.380860641766547
MIX59	0.325105145778107	0.344711066614136	0.0332544144975035	0.296929373110253
MIX60	0.215803460398243	0.277104871886772	0.28264821229317	0.224443455421815
MIX61	0.373610044112061	0.099684658204842	0.22479602144466	0.301909276238437
MIX62	0.105400756763327	0.152363269492225	0.266487718992223	0.475748254752225
MIX63	0.437500889817363	0.112963648142983	0.307978296096337	0.141557165943318
MIX64	0.382913731918269	0.0606863518996661	0.0788395322845054	0.47756038389756
MIX65	0.127099713408495	0.433347932652861	0.317197849744479	0.122354504194165
MIX66	0.628290289364483	0.12866561718621	0.121779706424005	0.121264387025302
MIX67	0.146279239381978	0.238906827246046	0.251634536574451	0.363179396797525
MIX68	0.478707918966771	0.0806849543734048	0.267571630125229	0.173035496534596
MIX69	0.501397546837326	0.350054315433496	0.0494028903674107	0.0991452473617671
MIX70	0.0494337130297848	0.194944997303439	0.064341263394717	0.691280026272059
MIX71	0.162080995375878	0.286731478908531	0.0681049349324483	0.483082590783143
MIX72	0.383505372405892	0.298638489772834	0.0182435063286986	0.299612631492576
MIX73	0.00120507415021618	0.506052287841227	0.240196858808069	0.252545779200488
MIX74	0.299892345070633	0.419867167326706	0.0180418455314193	0.262198642071242
MIX75	0.271809185978838	0.151225671079572	0.204534665543987	0.372430477397603
MIX76	0.182027649621199	0.374195968562696	0.194483737227037	0.249292644589068
MIX77	0.347679100707782	0.308417090141499	0.264413329648642	0.0794904795020771
MIX78	0.367194661281415	0.376655479292698	0.0249126454690357	0.231237213956852
MIX79	0.241428355927789	0.23512797892693	0.336464222916723	0.186979442228558
MIX80	0.240425434675819	0.340580732184796	0.349198710446024	0.0697951226933615
MIX81	0.134544673115366	0.253428780375642	0.158008144348788	0.454018402160204
MIX82	0.150584505570394	0.354212446032334	0.465354468246007	0.0298485801512656
MIX83	0.186434989117155	0.0491980865522077	0.398421628631186	0.365945295699451
MIX84	0.177306937575713	0.374964817478996	0.345253107499508	0.102475137445783
MIX85	0.397565023972756	0.551599561621724	0.0263288125260495	0.024506601879471
MIX86	0.281551887956862	0.226809570896931	0.32864372652676	0.162994814619447
MIX87	0.364225895671799	0.146112173653146	0.13644207182064	0.353219858854415
MIX88	0.106193424150533	0.0831012900392951	0.384339852683711	0.42636543312646
MIX89	0.106182732704059	0.318321727803502	0.28830093399156	0.287194605500878
MIX90	0.300369811741877	0.325734644857193	0.266639209970887	0.107256333430043
MIX91	0.331571806686505	0.207478076627587	0.0403488331249688	0.420601283560939
MIX92	0.275011070587042	0.245820537502602	0.280883672336061	0.198284719574294
MIX93	0.23659123042146	0.0811809543182116	0.437086140523807	0.245141674736522
MIX94	0.269199255784055	0.149291276117035	0.350569094998281	0.230940373100629
MIX95	0.302717163061639	0.302170277756544	0.297662218236139	0.0974503409456784
MIX96	0.339574826495381	0.303675142637522	0.332939054012966	0.0238109768541309
MIX97	0.266953630917502	0.31982783022788	0.231904043715656	0.181314495138962
MIX98	0.553282525895618	0.312501387718735	0.113024364519577	0.0211917218660699
MIX99	0.291747548527055	0.242120580229679	0.349329874640126	0.116801996603141
MIX100	0.253065253169312	0.063418037664193	0.264182799963252	0.419333909203243
MIX101	0.388060707896603	0.0454361447154647	0.261812977943588	0.304690169444345
MIX102	0.248864046514841	0.153423930918744	0.336542028494677	0.261169994071737
MIX103	0.307492454629753	0.19263526936621	0.0881353935166972	0.411736882487339
MIX104	0.280819710499323	0.167904195380227	0.310293021588423	0.240983072532027
MIX105	0.100136157251192	0.284973007419988	0.365314234377817	0.249576600951003
MIX106	0.335512346813471	0.204091509837546	0.149078096729887	0.311318046619095
MIX107	0.25400541194709	0.318026061995003	0.0854313497615018	0.342537176296406
MIX108	0.338388678973016	0.144135646752776	0.380274733170279	0.137200941103929
MIX109	0.210086494391013	0.476117726816273	0.266614809082855	0.0471809697098586
MIX110	0.069931382922777	0.248965265247499	0.290450640485873	0.390652711343851
MIX111	0.210694379975904	0.239750912734773	0.257334821286328	0.292219886002995
MIX112	0.0640519023215153	0.0406039960086184	0.305331875431468	0.590012226238398
MIX113	0.316093157967681	0.320404298123448	0.245439532006669	0.118063011902203
MIX114	0.222842409701492	0.327904254098633	0.237164898982259	0.212088437217616
MIX115	0.204255604489179	0.0827974992661483	0.368355854812282	0.344591041432391
MIX116	0.119137019181335	0.524182326598058	0.169126086928159	0.187554567292449
MIX117	0.206871729358303	0.264232687249192	0.228915791904767	0.299979791487737
MIX118	0.185526033709304	0.214432360782507	0.327552430808505	0.272489174699684
MIX119	0.229138467952613	0.318805196193734	0.255230618699582	0.196825717154071
MIX120	0.197616197543074	0.135839101607277	0.202739074935624	0.463805625914025
MIX121	0.492776251535802	0.0957402248946284	0.144585589525961	0.266897934043608
MIX122	0.138289533176861	0.499324592503058	0.221995016389857	0.140390857930224
MIX123	0.222809282925214	0.252046802953613	0.282250382045812	0.242893532075361
MIX124	0.224242539059445	0.390601876084083	0.0365188395122238	0.348636745344248
MIX125	0.405378136326213	0.203025630633184	0.0194410895179632	0.37215514352264
MIX126	0.0207837957710563	0.33907970781705	0.355990166368562	0.284146330043332
MIX127	0.402233126307995	0.0123132500561338	0.01391632031386	0.571537303322011
MIX128	0.199983132122142	0.12618913188107	0.283680275614343	0.390147460382444
MIX129	0.441733095922833	0.406590657180615	0.123433243491255	0.0282430034052968
MIX130	0.395088957796828	0.257786135826102	0.0280822886072779	0.319042617769792
MIX131	0.337788370467849	0.3601044987048	0.0826968110653425	0.219410319762008
MIX132	0.350659014950285	0.180855881096263	0.11677671928674	0.351708384666712
MIX133	0.246940815078666	0.265889385149873	0.355995827726531	0.13117397204493
MIX134	0.38122373559252	0.32840499987014	0.17274522899387	0.11762603554347
MIX135	0.335198780516969	0.26302290014067	0.315651290290831	0.0861270290515297
MIX136	0.663116936226988	0.246409704655566	0.0755139527015479	0.0149594064158983
MIX137	0.313703999157413	0.282944980438741	0.0528004299460711	0.350550590457774
MIX138	0.404011642474275	0.11988402974251	0.232489639458664	0.243614688324551
MIX139	0.208730321155724	0.264710779166342	0.244506153805491	0.282052745872444
MIX140	0.304280694563732	0.0310644956500852	0.2384659123505	0.426188897435682
MIX141	0.0731732946689571	0.260637753243876	0.31103546173991	0.355153490347257
MIX142	0.407285298996439	0.287963701878428	0.205059679870458	0.0996913192546743
MIX143	0.0686100892072817	0.39642066341924	0.254582222301738	0.28038702507174
MIX144	0.144706059154979	0.403914563415003	0.307922742414743	0.143456635015275
MIX145	0.0894029181003737	0.190912081863234	0.345389920180095	0.374295079856297
MIX146	0.040218177700305	0.654890069300801	0.284681250602673	0.0202105023962208
MIX147	0.367676122879859	0.271925419085454	0.151545734944681	0.208852723090006
MIX148	0.125575307594428	0.0400818833443805	0.565341485145065	0.269001323916126
MIX149	0.280968332184961	0.313580338093649	0.161564717451447	0.243886612269942
MIX150	0.273802640419533	0.141223902390244	0.233303898792767	0.351669558397456
MIX151	0.476430797810927	0.198616711384294	0.151872193876372	0.173080296928408
MIX152	0.336784590891942	0.291353116792774	0.164015231155334	0.207847061159951
MIX153	0.281513175341356	0.0274193886266574	0.408889791826756	0.28217764420523
MIX154	0.333513038505847	0.144779486201281	0.0969960686766534	0.424711406616219
MIX155	0.0311419552713344	0.336461385719684	0.23619523007257	0.396201428936412
MIX156	0.498872152813044	0.0571670733363252	0.0042872124085011	0.43967356144213
MIX157	0.507530943214613	0.0729222670035129	0.24332532255077	0.176221467231104
MIX158	0.371331111446834	0.207415701019466	0.115726626429938	0.305526561103762
MIX159	0.255651101218814	0.0891053841918567	0.0255580507512131	0.629685463838117
MIX160	0.243821140710606	0.328361810108211	0.152135360132842	0.275681689048342
MIX161	0.404896002868438	0.461055879769664	0.0911859275026188	0.0428621898592786
MIX162	0.0568684043259196	0.423637982801534	0.0311527628122823	0.488340850060264
MIX163	0.320336280543468	0.0349760700106307	0.198471195298645	0.446216454147256
MIX164	0.22957699975978	0.181161354134283	0.277842892513648	0.31141875359229
MIX165	0.339638285257488	0.0791342236212726	0.0585038254764262	0.522723665644813
MIX166	0.249084880431742	0.139216122632508	0.439020011787447	0.172678985148304
MIX167	0.131364101901116	0.479693605808984	0.138622130395026	0.250320161894874
MIX168	0.22210665874984	0.33358726144053	0.272700392308422	0.171605687501209
MIX169	0.290233084776073	0.415315316393655	0.217627074040087	0.0768245247901849
MIX170	0.0768711053618351	0.389645215975556	0.0571108485381796	0.476372830124429
MIX171	0.430343670133455	0.148983831913939	0.213570232991806	0.2071022649608
MIX172	0.0568419264198724	0.215429479054259	0.35832329147433	0.369405303051539
MIX173	0.0287488332666138	0.740428976433189	0.0109170972137361	0.219905093086462
MIX174	0.220280909696349	0.253655546534876	0.139980996265332	0.386082547503443
MIX175	0.332180943598328	0.138147584795068	0.378644065204105	0.151027406402499
MIX176	0.484132466124839	0.314795300879303	0.00720531076640736	0.19386692222945
MIX177	0.0776378011984709	0.409365394858616	0.282039573870806	0.230957230072107
MIX178	0.140327808046959	0.224275771484433	0.00630961571809301	0.629086804750515
MIX179	0.310457763808658	0.230592036151469	0.184120107120053	0.27483009291982
MIX180	0.213363147883263	0.0634809085423178	0.25063169196166	0.472524251612759
MIX181	0.377850800389686	0.144153310602246	0.347643492538033	0.130352396470035
MIX182	0.425744261060804	0.05024433826303	0.455348413085427	0.0686629875907386
MIX183	0.543583765152235	0.100445548152026	0.106331979430329	0.249638707265411
MIX184	0.134735794447221	0.482869814003178	0.117182227091146	0.265212164458455
MIX185	0.221384804731925	0.0798221289719083	0.27040959693836	0.428383469357806
MIX186	0.314949938580199	0.245020335269843	0.436525102091145	0.00350462405881299
MIX187	0.365513611756202	0.236508381080384	0.101896875443314	0.296081131720101
MIX188	0.0221441753930708	0.242445912505925	0.230290047199791	0.505119864901213
MIX189	0.224735205998588	0.430736787080331	0.317405490107029	0.0271225168140513
MIX190	0.294190545871868	0.07106005725634	0.413505795191579	0.221243601680213
MIX191	0.282507324875076	0.033244828705698	0.244642655485745	0.439605190933481
MIX192	0.181473405325594	0.363531983672185	0.11397525264242	0.341019358359802
MIX193	0.394078303763932	0.446633789952671	0.07890752315881	0.0803803831245868
MIX194	0.52566956957642	0.0688459463790243	0.0518865765987965	0.353597907445759
MIX195	0.328752338814086	0.343716188024772	0.252408525234332	0.0751229479268096
MIX196	0.213678292304743	0.150637305643066	0.375052909988443	0.260631492063747
MIX197	0.207521799623079	0.0382312270007376	0.351022650709395	0.403224322666788
MIX198	0.325114375181853	0.266625425109408	0.0864011537538758	0.321859045954863
MIX199	0.128349287867365	0.22447238115169	0.0825969614820245	0.56458136949892
MIX200	0.0851087301943189	0.0522611305930233	0.425844157634308	0.43678598157835

## Sheet: Immune_cells_450k
	Neutrophil	Natural killer cell	B-cell	CD4+ T-cell	CD8+ T-cell	Monocyte
MIX1	0.231229064612715	0.226749514535338	0.129643408299115	0.144093369824981	0.171450691362853	0.0968339513649977
MIX2	0.265946702026932	0.268506644003666	0.080343403690823	0.172181804389966	0.0567445347387161	0.156276911149896
MIX3	0.00891098924175696	0.330603631078893	0.155752521704397	0.102117464302929	0.158792838054443	0.243822555617581
MIX4	0.172763659491399	0.241610005972495	0.214005884189049	0.0355879437326444	0.0967487691507778	0.239283737463634
MIX5	0.17727805247428	0.0857388444337179	0.256985250946692	0.238057344134968	0.0648042360463806	0.17713627196396
MIX6	0.102342157486698	0.393047060690165	0.289739837536605	0.0637910766626811	0.0423181637712373	0.108761703852613
MIX7	0.249687690125616	0.208088184300534	0.112857888934734	0.108401757242315	0.044040240601333	0.276924238795469
MIX8	0.223188522369489	0.095400095245194	0.255894783442974	0.040565926793506	0.112470067535635	0.272480604613202
MIX9	0.0655077372753957	0.23723239863798	0.240118825244017	0.378537761798139	0.0287981799190266	0.0498050971254412
MIX10	0.0831775378308503	0.246147427094367	0.122688178878392	0.278735799774148	0.195274026825118	0.0739770295971249
MIX11	0.0220282981003774	0.181475508971117	0.330213219593062	0.0269585822123921	0.13964707373823	0.299677317384821
MIX12	0.0565350043050366	0.266760730997324	0.155201667496286	0.224437505664177	0.247297565488429	0.0497675260487483
MIX13	0.0859937259879634	0.00459657978207061	0.270014092954337	0.111948348023574	0.441153959820717	0.0862932934313374
MIX14	0.231298546798379	0.0101046327910958	0.345035241227937	0.148979073442371	0.152723712016937	0.11185879372328
MIX15	0.125972166871534	0.149392068251043	0.0645095842230382	0.296673854371901	0.0871919179147307	0.276260408367754
MIX16	0.281680337903002	0.154585184148386	0.250112813770174	0.109501484966379	0.122797484824121	0.0813226943879386
MIX17	0.291769789517108	0.122118908215732	0.308243322622508	0.0147910109411031	0.0818860906605005	0.181190878043048
MIX18	0.0911548806409477	0.307415803166754	0.108483863916081	0.145867900658834	0.269799522388393	0.0772780292289912
MIX19	0.0844121162814666	0.22351637839138	0.280963742662754	0.228687792712642	0.125215708719451	0.0572042612323069
MIX20	0.155539646025175	0.300905990857352	0.110639971525102	0.130882923801076	0.181400146913597	0.120631320877698
MIX21	0.156578958181111	0.173127782568946	0.0822662749014215	0.284013645552069	0.0556045453895504	0.248408793406902
MIX22	0.112867942942883	0.115622265870502	0.246490044396256	0.311422862882396	0.0800546324037443	0.133542251504218
MIX23	0.336296382184352	0.0183639397861338	0.229970769459318	0.000721096389804965	0.0358742288159126	0.378773583364478
MIX24	0.0472167594393577	0.369698121068378	0.144831983188453	0.182713311657682	0.0103987855231074	0.245141039123022
MIX25	0.0707902602351417	0.0535514707393793	0.0473533475632015	0.247793758970064	0.320569639753149	0.259941522739065
MIX26	0.119013899902349	0.0345340632763775	0.231147399972791	0.150229479620513	0.219952955048486	0.245122202179483
MIX27	0.109441536350015	0.161231472047926	0.196066124731823	0.0793330767043692	0.0860817209200184	0.367846069245848
MIX28	0.272689020995148	0.207302026949328	0.207438470483864	0.0595478095263873	0.0923334084788188	0.160689263566453
MIX29	0.156293842186998	0.144285575241955	0.19565060651398	0.235054996400118	0.247046050026027	0.0216689296309228
MIX30	0.329040782478339	0.0640047917946202	0.0431453871181127	0.376861250973555	0.108025407645276	0.0789223799900967
MIX31	0.0530937154571536	0.413794918724284	0.152449768127023	0.140063925942602	0.0681310726366847	0.172466599112252
MIX32	0.280232065856263	0.201194633927562	0.242478248488148	0.062317142498207	0.0727813409200951	0.140996568309725
MIX33	0.00539491965882925	0.335737016321642	0.188295584497022	0.0992445724683777	0.232030795666933	0.139297111387196
MIX34	0.0543392270772833	0.120386532796425	0.119841643085751	0.26699402584859	0.18963354442931	0.24880502676264
MIX35	0.173999874613168	0.189288208010241	0.219783096621208	0.0914746725641127	0.112895458274428	0.212558689916841
MIX36	0.0740396850567915	0.252482620593383	0.111572317593719	0.363047136988752	0.102868237193777	0.0959900025735769
MIX37	0.110588805969924	0.043466809319465	0.0808398464139474	0.299906782210754	0.276434133861347	0.188763622224563
MIX38	0.0212705805698734	0.14573429209174	0.237652591162996	0.176726312315686	0.248709611804826	0.169906612054879
MIX39	0.0337411055778949	0.28013997472054	0.0296115337801071	0.267895027454118	0.150730703940383	0.237881654526957
MIX40	0.281567488741841	0.208676509731264	0.250750193446602	0.157530866777044	0.0992942274930293	0.00218071381021972
MIX41	0.0686744074130183	0.284600489007792	0.211310022637425	0.12537879969889	0.239602137640261	0.0704341436026142
MIX42	0.253664106468275	0.14674806471901	0.132650540440217	0.224638490028226	0.131995043334238	0.110303755010034
MIX43	0.000905158425935468	0.150730439776596	0.307609138917593	0.289300796360545	0.0898566142222279	0.161597852297103
MIX44	0.275333879849905	0.27678661762674	0.00308156646698186	0.219359228814945	0.10109197809467	0.124346729146759
MIX45	0.199799819265314	0.368085088551629	0.167613040342325	0.0127346910189922	0.17209923472248	0.0796681260992602
MIX46	0.0544881385664753	0.366450980904064	0.0718876891462034	0.112227043356156	0.155769330313483	0.239176817713617
MIX47	0.0638720279127415	0.0027696292906699	0.0915760327230075	0.149513918345464	0.45883610508053	0.233432286647587
MIX48	0.200170733392882	0.216760825640009	0.260684743589958	0.0771325223980445	0.132662880354529	0.112588294624577
MIX49	0.12047754132987	0.132719721709194	0.0256316962808654	0.280419230590676	0.328217852277585	0.112533957811809
MIX50	0.11962574810993	0.218718579105345	0.259844143060756	0.0304411516880204	0.194162459367096	0.177207918668853
MIX51	0.313650280931721	0.277423783578869	0.155867146209799	0.136070534655655	0.0107995868335707	0.106188667790385
MIX52	0.1074834115438	0.256200200596647	0.0666298572741475	0.0552358608400052	0.246262647303203	0.268188022442197
MIX53	0.135312306969156	0.099304290622771	0.240946159644206	0.197591302186506	0.193156588598162	0.1336893519792
MIX54	0.243124585910219	0.329358232527976	0.181301820685651	0.00359291168933209	0.0757665854659767	0.166855863720846
MIX55	0.0702876307722407	0.172940659802429	0.245796194623878	0.227229138468844	0.188003711028652	0.0957426653039553
MIX56	0.235393913741379	0.148788150557022	0.180810314564654	0.171160564694582	0.21803573141679	0.0458113250255728
MIX57	0.110475203608261	0.155474527122152	0.081948506924259	0.168752746790773	0.282097525112745	0.20125149044181
MIX58	0.0623427826507044	0.221059474399268	0.201727398918087	0.105292748484931	0.228724672140986	0.180852923406025
MIX59	0.221827542294253	0.276203099188248	0.116682554622437	0.077727039894101	0.101015855538609	0.206543908462352
MIX60	0.0834789067117928	0.0560339731328495	0.338210727050201	0.168551244265514	0.107213958404772	0.246511190434871
MIX61	0.106753260156972	0.222770541839064	0.286218038328292	0.0266000645131897	0.152040367884138	0.205617727278344
MIX62	0.0419773450740327	0.34274206038766	0.185949221648701	0.0701940918215356	0.211386478672172	0.147750802395898
MIX63	0.0834618792053192	0.0718649410381724	0.315886515201854	0.324717462365191	0.0789011283510088	0.125168073838454
MIX64	0.190312852582896	0.141255983166887	0.101024436975289	0.140824329860044	0.0906242294040861	0.335958168010798
MIX65	0.253311273528475	0.203838298907809	0.154664437956641	0.304507659297218	0.0508464278051587	0.0328319025046984
MIX66	0.170429701521492	0.066038032377409	0.207509005365418	0.29473887868759	0.149346893053727	0.111937488994364
MIX67	0.163245340896401	0.299855177969954	0.0865429899962807	0.156133905681922	0.0203979725883985	0.273824612867044
MIX68	0.121237061855015	0.231841203387075	0.0903934012409236	0.181644171853814	0.170487602106854	0.204396559556319
MIX69	0.222639059771287	0.196464249388217	0.188241112926965	0.164428579656048	0.100144040572777	0.128082957684706
MIX70	0.13014902347438	0.102048805483946	0.206306556947573	0.141391915788933	0.132052575037163	0.288051123268005
MIX71	0.148166055880754	0.203242465376435	0.255168365405247	0.0567509186209428	0.11465828657801	0.222013908138612
MIX72	0.0163200635978045	0.137900332557637	0.309961080396022	0.138680651947027	0.194759228054116	0.202378643447395
MIX73	0.0864593922429746	0.109646867720797	0.216272864269157	0.2108901880415	0.177236486121092	0.19949420160448
MIX74	0.0908189653792795	0.245172052665659	0.206623338089121	0.15967358948924	0.0295139159471984	0.268198138429502
MIX75	0.158454655700793	0.0719217863756095	0.185989535533817	0.05983681272554	0.24603469891362	0.27776251075062
MIX76	0.156406377746047	0.062660101575215	0.134593458149812	0.397133794586249	0.105323435600023	0.143882832342653
MIX77	0.16246999492663	0.299003491712014	0.00495004463778223	0.0164109873893444	0.351723493873063	0.165441987461166
MIX78	0.0228672701279017	0.160530851587073	0.163501875501382	0.078310361946685	0.282119603577798	0.29267003725916
MIX79	0.289962951982435	0.0784117523260826	0.24857227940162	0.0394522417633218	0.212215161923053	0.131385612603488
MIX80	0.0211907370639609	0.323251026176684	0.145622480575183	0.143451248240418	0.0930038338368618	0.273480674106893
MIX81	0.120268082835441	0.515965733298835	0.0812319179736053	0.100627563698105	0.115425557558237	0.0664811446357759
MIX82	0.208745774715716	0.248146038396185	0.245711685765347	0.0968575516103922	0.177332116191549	0.0232068333208102
MIX83	0.019909897695586	0.0523181632182754	0.0568611758202519	0.478925390552125	0.145593297353832	0.246392075359929
MIX84	0.182488174042921	0.106286865362978	0.27551816556787	0.0324770378470696	0.248774824473573	0.154454932705588
MIX85	0.180861356252832	0.0103705449913776	0.14344552332054	0.263592085080535	0.0111068551157681	0.390623635238948
MIX86	0.000690426812500776	0.0259106362261493	0.254931004590231	0.111885389687948	0.262816668853775	0.343765873829396
MIX87	0.234904200922053	0.188827286721254	0.25047137036216	0.0322210217322955	0.220615389548359	0.0729607307138783
MIX88	0.441955016002142	0.120658679408529	0.079988395053645	0.0189408874825177	0.310483967164845	0.0279730548883213
MIX89	0.132576408813467	0.200647142842877	0.109889601646359	0.179244729897856	0.218187344015856	0.159454772783586
MIX90	0.273028862177631	0.0572291372613173	0.188969515445866	0.0635635662557029	0.0958180807825455	0.321390838076937
MIX91	0.0510078153865886	0.27256914941252	0.180133576297493	0.124797845265501	0.330765477838306	0.0407261357995915
MIX92	0.0949812719543022	0.293149422317775	0.244137608591182	0.0986970414885628	0.154407960738914	0.114626694909264
MIX93	0.0600611830148945	0.205717288464579	0.240968519667351	0.155688896146213	0.174242509926289	0.163321602780673
MIX94	0.222003402341709	0.242654349979152	0.183072673007667	0.0074266869799645	0.121884875265816	0.222958012425691
MIX95	0.086471723787791	0.043751406877961	0.21910807549342	0.242554411097725	0.0892708155039802	0.318843567239122
MIX96	0.24792929302625	0.17549544288242	0.239695414354055	0.0692690312344437	0.0102656972031157	0.257345121299716
MIX97	0.0358517100013007	0.216796693664012	0.029991268836116	0.273041359779306	0.00184916695879117	0.442469800760474
MIX98	0.158106676397707	0.124462513123565	0.295824590775881	0.299481014532439	0.107225122155149	0.014900083015259
MIX99	0.233817476612668	0.190958948673352	0.163032374874541	0.0947777832040854	0.222254985616365	0.0951584310189895
MIX100	0.108575986954754	0.242828236450423	0.278423850341777	0.125841578629863	0.108520406057718	0.135809941565464
MIX101	0.0946232015168737	0.240451105559011	0.0116475225211227	0.149709476910255	0.240003642539104	0.263565050953634
MIX102	0.0853141666858166	0.250622179635657	0.0724131764318122	0.225629574395796	0.260288110181774	0.105732792669145
MIX103	0.165283686237659	0.203334268058265	0.0613801768059564	0.13026567703645	0.354465995186075	0.0852701966755949
MIX104	0.190245113998387	0.0920449729945322	0.0579427144310373	0.29645763695348	0.0969364940802029	0.26637306754236
MIX105	0.00704402611541415	0.206477297945173	0.208105424344837	0.241922970106991	0.206081116161361	0.130369165326223
MIX106	0.112306356739348	0.157911946636552	0.278150698716122	0.0213498700076466	0.357867651619341	0.0724134762809902
MIX107	0.254350040134186	0.319417314990074	0.106825490273766	0.00159232437641126	0.261878144377655	0.0559366858479071
MIX108	0.357293157892774	0.0381043268518204	0.0297802419485509	0.0237379990400631	0.129238798409857	0.421845475856934
MIX109	0.240334888647813	0.0252871825712044	0.173926280958079	0.0477929627634489	0.24527124602322	0.267387439036234
MIX110	0.16350232564978	0.167359841991415	0.0526923519396744	0.171981838595339	0.20915522131211	0.235308420511681
MIX111	0.222207614295517	0.135117885224216	0.171921165854749	0.00429223730613755	0.275079032839208	0.191382064480171
MIX112	0.125900506823595	0.31268957402143	0.208785749522501	0.219700787068858	0.00358791939393607	0.12933546316968
MIX113	0.154601121773783	0.090510975132201	0.259348136066348	0.102893964253813	0.187996932378316	0.204648870395539
MIX114	0.399338719442245	0.360026924638199	0.0139638975490575	0.125770397538091	0.0124451081218404	0.0884549527105666
MIX115	0.221372986684414	0.129553837955177	0.237049777252621	0.20790126326026	0.195718891034634	0.00840324381289387
MIX116	0.293924486968532	0.0603865559935617	0.158875361556843	0.0905812046396096	0.269627516467732	0.126604874373722
MIX117	0.162391744466769	0.127817041100745	0.187538746061573	0.237305915135537	0.116749709053749	0.168196844181627
MIX118	0.517402036041797	0.0131484844468638	0.0118947002579278	0.118969293286771	0.282602321214237	0.0559831647524031
MIX119	0.187025451029928	0.0174051196123529	0.198386521486267	0.3012284360296	0.217788025690004	0.0781664461518484
MIX120	0.0624041672510959	0.152432441138021	0.0200653630505943	0.245159554639663	0.257081267059981	0.262857206860645
MIX121	0.3052092821533	0.241769208873075	0.127872525704059	0.116575084174599	0.109800004871481	0.0987738942234868
MIX122	0.080591302999496	0.209858432325814	0.320457074258977	0.206965642558407	0.132957014400276	0.0491705334570299
MIX123	0.127483784214818	0.0368260786421105	0.286270856113378	0.0924373017448504	0.137309910987008	0.319672068297836
MIX124	0.252227844010642	0.0500356162585607	0.0716260515343015	0.332494219889542	0.136430350668821	0.157185917638133
MIX125	0.279714752378202	0.0878719927642391	0.0699148824675124	0.0777747654856725	0.286820745260289	0.197902861644086
MIX126	0.13584465496407	0.183430553132283	0.240219486363801	0.151560054078807	0.246723492005735	0.0422217594553037
MIX127	0.128903829629991	0.187159867750387	0.198553287320613	0.144562920248765	0.0464577330590002	0.294362361991244
MIX128	0.373961995099344	0.189088322503664	0.251464643558398	0.0959087977463971	0.0349961036202916	0.054580137471906
MIX129	0.483803460021772	0.0582918067213288	0.0104090086318192	0.0484837543814004	0.300427963647993	0.0985840065956864
MIX130	0.173772391331515	0.169687685768589	0.206852199091554	0.206946803689524	0.197313320429649	0.045427599689169
MIX131	0.0286809240853132	0.0240663055923419	0.202182478123295	0.413793487104821	0.224787204077906	0.106489601016322
MIX132	0.225431888616241	0.218619951325968	0.0855074396991837	0.134837843944636	0.120045480942569	0.215557395471402
MIX133	0.252176962438578	0.230309779855956	0.164340424035996	0.0626352143349624	0.0143330241544793	0.276204595180028
MIX134	0.0715173650731964	0.131692133066588	0.0348376034333059	0.280744220136508	0.299654641944614	0.181554036345788
MIX135	0.219915629460208	0.325543207888131	0.060797145044602	0.0417160658666665	0.139168346308766	0.212859605431627
MIX136	0.272595279142061	0.00833293173409515	0.283037762348469	0.13637512552579	0.0325820125417116	0.267076888707874
MIX137	0.13195547450396	0.214399620437756	0.105747702926406	0.102696759395616	0.375967065305762	0.0692333774305002
MIX138	0.00529316599104378	0.194994895312841	0.227258884262682	0.222117643512002	0.189934763976477	0.160400646944954
MIX139	0.117021038841386	0.200355583931169	0.0249162862949388	0.229855402073162	0.204034810418214	0.223816878441131
MIX140	0.0773727500722435	0.0479862689098448	0.00708943778701142	0.360394934839907	0.252514208093191	0.254642400297802
MIX141	0.143929024138186	0.260491135288524	0.0307258323949915	0.192327155954929	0.260773043463685	0.111753808759684
MIX142	0.0792694266915046	0.169422948212479	0.11508455695038	0.265469780482336	0.0848589288457323	0.285894358817567
MIX143	0.166269311140254	0.221472293926753	0.379157021383392	0.106740434257245	0.0971097374565147	0.029251201835841
MIX144	0.179860967679093	0.242235568960268	0.0550694250840378	0.123248173719374	0.284647922517965	0.114937942039263
MIX145	0.13381370146188	0.162160832012986	0.158816361258299	0.117775254725506	0.192141613137348	0.23529223740398
MIX146	0.247969624075715	0.210888616063819	0.131216495596215	0.131326030806905	0.0916563141233341	0.186942919334012
MIX147	0.319298238314944	0.305546859067227	0.112364321252319	0.077573531550235	0.0609165389710481	0.124300510844227
MIX148	0.311416184895399	0.164569725192775	0.290474875406279	0.0165516042277953	0.149669250189318	0.0673183600884335
MIX149	0.177189159247326	0.289042148221912	0.0572903955928709	0.265370297109663	0.00587328328080854	0.205234716547419
MIX150	0.049138877611654	0.237032456138716	0.164786620438139	0.272665626558218	0.0528168830446029	0.22355953620867
MIX151	0.0785877306978378	0.0663914935603618	0.0367409078177182	0.220284408936841	0.403514237082044	0.194481221905197
MIX152	0.0594228377796599	0.128902019496037	0.277550769894746	0.0759290683901991	0.269071776905586	0.189123527533773
MIX153	0.162617495655442	0.00285601039645694	0.190658899450901	0.0948013427948819	0.304235232689748	0.24483101901257
MIX154	0.185660661910672	0.166847173024993	0.0585035090433879	0.177172387249086	0.334048184695018	0.0777680840768432
MIX155	0.317742731973825	0.0230149650858105	0.0689866398508005	0.162119299510114	0.099099984264211	0.329036379315238
MIX156	0.141418937842961	0.0249174958309083	0.176551194251512	0.261352544527993	0.234195136055477	0.161564691491149
MIX157	0.119247069973211	0.0347754223282533	0.155363294261856	0.315122768675448	0.251894851504187	0.123596593257044
MIX158	0.158843129921092	0.172242036531327	0.147244954259762	0.171001547361561	0.166073606021979	0.184594725904278
MIX159	0.258120788544331	0.0447045457483701	0.18258870188677	0.0106566622017449	0.235947244531775	0.267982057087009
MIX160	0.116057319832492	0.127115235697733	0.0439468675552852	0.195627293651593	0.270614994616671	0.246638288646225
MIX161	0.0703567894522038	0.363367979953222	0.416029595865911	0.0114330563646115	0.0758316073799668	0.0629809709840846
MIX162	0.171969060966706	0.216033617213197	0.257185723615494	0.249418127700584	0.0260477570731313	0.0793457134308876
MIX163	0.155227928320455	0.112907442860051	0.173432130282612	0.08762149530929	0.2218905552721	0.248920447955491
MIX164	0.248279994876518	0.293088367427985	0.181269434084302	0.0502131406599858	0.0797073047184881	0.147441758232721
MIX165	0.215924013336465	0.227828405572575	0.196850652981571	0.109918279976343	0.0415414036933038	0.207937244439743
MIX166	0.254611876371393	0.258773741279843	0.020294323255762	0.0785092934015857	0.172392418741091	0.215418346950325
MIX167	0.322257126390618	0.308265791055307	0.0645244866215656	0.179862348606719	0.0204508216044219	0.104639425721369
MIX168	0.184845740971974	0.288107269020807	0.0883846350658081	0.248154116073509	0.00394555398989663	0.186562684878005
MIX169	0.125589208751976	0.209093909993661	0.0139730690614704	0.175985547449105	0.262225650768011	0.213132613975777
MIX170	0.113492180588425	0.0332081602279813	0.280536946598804	0.209289313333375	0.267290129875927	0.0961832693754876
MIX171	0.0796805959165599	0.268553537944218	0.222168606140462	0.127489190653061	0.283919991992028	0.0181880773536717
MIX172	0.27351045844225	0.0986060020562622	0.14410635157543	0.201761809910708	0.214528362789039	0.0674870152263096
MIX173	0.407162665787934	0.0653401056523457	0.0582361072432861	0.411575601822631	0.0418229028568946	0.0158626166369093
MIX174	0.0646376607405801	0.392075216665292	0.159952472486258	0.00287345618397741	0.219347824932457	0.161113368991434
MIX175	0.235123980160007	0.211410849984342	0.262688738271414	0.0310237063498773	0.00607185498107447	0.253680870253285
MIX176	0.241154511414766	0.0873833067363998	0.146840983765092	0.192748130461777	0.315219368240098	0.0166536993818663
MIX177	0.0724061660923793	0.215581891341574	0.0898563186919444	0.119487017019907	0.201189478251811	0.301479128602384
MIX178	0.14265908660405	0.100626055516081	0.118168708714782	0.294589336142712	0.343258465412318	0.000698347610057573
MIX179	0.186849502735251	0.0945751173482123	0.269883240253332	0.130761069076922	0.168896723710765	0.149034346875518
MIX180	0.139507975360839	0.0734886433827218	0.157187964405778	0.176985101114819	0.204717538389665	0.248112777346178
MIX181	0.232486475148332	0.207723131461153	0.0507058505254575	0.331681718816795	0.0508845853170196	0.126518238731243
MIX182	0.105699329386943	0.133896000194785	0.121856788724368	0.243058653946005	0.17879293745772	0.216696290290178
MIX183	0.123073339083057	0.0271309344723992	0.111254019042885	0.103888505016075	0.267054958010324	0.36759824437526
MIX184	0.0325375911741197	0.199823829306082	0.0550285648947455	0.159932377401227	0.27778923033869	0.274888406885136
MIX185	0.258824849914265	0.333326593496948	0.00902135816135913	0.158372657969276	0.110985955484322	0.12946858497383
MIX186	0.0340841063784802	0.10545420823593	0.0395904189253625	0.27494009548999	0.28344284310698	0.262488327863258
MIX187	0.0409717067517508	0.230398787216264	0.138152040841841	0.197059185845437	0.137681531637127	0.25573674770758
MIX188	0.16528567279609	0.312515344855202	0.127754745217703	0.0526904460993718	0.0596595987348393	0.282094192296795
MIX189	0.314387048569917	0.452254468236476	0.00823018746667715	0.00399747751674021	0.0266390301262424	0.194491788083948
MIX190	0.0852141788067856	0.263600028117167	0.138852754035063	0.332297695552598	0.100949444177657	0.0790858993107287
MIX191	0.0213781044304332	0.31200886406388	0.169258534256542	0.107301487501724	0.285299450833596	0.104753558913825
MIX192	0.108593934128108	0.191936051482731	0.136202691858007	0.237056132218126	0.0813581470044388	0.244853043308588
MIX193	0.0313298422335211	0.106391366566986	0.224335313380218	0.108698145618088	0.281004689061994	0.248240643139194
MIX194	0.205911234951934	0.233372874346277	0.0537774355012454	0.114361617655517	0.215153987049025	0.177422850496002
MIX195	0.0486151002456546	0.249122456925856	0.188171233620896	0.164284567542226	0.243652508084595	0.106154133580772
MIX196	0.181014442657507	0.369288445528345	0.087478843880997	0.090032789210291	0.190659285547393	0.0815261931754672
MIX197	0.113571698195962	0.164313653856028	0.232371062412829	0.133976600394798	0.142592393273471	0.213174591866913
MIX198	0.323797166141021	0.0218533336025687	0.0415112293556771	0.283766785315912	0.0256040385831989	0.303467447001622
MIX199	0.0437078112324145	0.171777958807487	0.043701541867677	0.189277761273346	0.245263003349981	0.306271923469094
MIX200	0.24659916874748	0.24581797760256	0.0891881756204466	0.0535469887361034	0.231739593406713	0.133108095886696

## Sheet: Immune_cells_850k
	Neutrophil	Natural killer cell	B-cell	CD4+ T-cell	CD8+ T-cell	Monocyte
MIX1	0.2994519973092	0.21745566263938	0.133345945347742	0.220293315730672	0.111331933873057	0.0181211450999486
MIX2	0.0782099069454311	0.370916980694488	0.115233794792221	0.0784172244562534	0.311001918233848	0.0462201748777589
MIX3	0.287092678760309	0.023189632388307	0.228650420824481	0.211022025307539	0.0580914795559525	0.191953763163411
MIX4	0.240825554605746	0.241713976506494	0.0266296907170618	0.322570442282708	0.0322190806489392	0.136041255239051
MIX5	0.204530691223263	0.021702803886893	0.248222464526428	0.280177710612782	0.0741241403419133	0.171242189408722
MIX6	0.188129892814899	0.0972879609350207	0.13688632317641	0.0685334388788904	0.24302209621233	0.26614028798245
MIX7	0.0153241549893917	0.39373254725939	0.129164766232137	0.340212623532898	0.0482542791090967	0.0733116288770865
MIX8	0.201018598342648	0.109995774043595	0.232201950023685	0.202532322130584	0.211262078784068	0.0429892766754193
MIX9	0.0704202028601274	0.128744939615708	0.261651239737289	0.221466377967333	0.13239706947608	0.185320170343463
MIX10	0.208996822005931	0.109127466389787	0.230568920081304	0.178252686708546	0.186534042235787	0.0865200625786451
MIX11	0.181529366660975	0.00395749147422349	0.177662901061571	0.159005502334034	0.150891897154884	0.326952841314313
MIX12	0.182882673994733	0.260047426601393	0.145597148459636	0.0753242080145832	0.142491221103112	0.193657321826543
MIX13	0.308533131953667	0.112744771210335	0.200740042361348	0.091993607876234	0.000414261945635675	0.285574184652781
MIX14	0.198686608375034	0.247175834458135	0.0529371886101127	0.0462194890737021	0.218390670185934	0.236590209297083
MIX15	0.0919306616856261	0.179062072067803	0.198328363454685	0.221121884872058	0.164594696014097	0.14496232190573
MIX16	0.309547096304382	0.110724371731933	0.180938151110194	0.0814214602599799	0.103672258209048	0.213696662384463
MIX17	0.23574306205768	0.233429417883661	0.227191778907082	0.166334010446705	0.0837046155263416	0.0535971151785307
MIX18	0.242975276565435	0.126471985637736	0.00301210438034944	0.168917189136656	0.359042393643296	0.0995810506365265
MIX19	0.28005375922103	0.0885340999946571	0.0437753405005482	0.10443238620738	0.202635854997031	0.280568559079355
MIX20	0.0192516385207799	0.28724312229753	0.0490112871495915	0.0980862286844854	0.260658538666879	0.285749184680734
MIX21	0.159417285167966	0.176788823144767	0.124222254092227	0.0859529197414202	0.229251904898068	0.224366812955551
MIX22	0.217639725248709	0.188575326907021	0.226476581448454	0.0611216705227314	0.210308558163588	0.0958781377094967
MIX23	0.10465869876349	0.257148166342642	0.066761753543727	0.139034303417709	0.183551089759444	0.248845988172988
MIX24	0.139998921639766	0.178002748492313	0.271216594969888	0.0795245962439895	0.229228891807928	0.102028246846115
MIX25	0.0453540349945689	0.0394345044038655	0.118979643101736	0.120173210183936	0.129013587679974	0.547045019635919
MIX26	0.293188705775748	0.184854654352684	0.146913438441058	0.0150672391209291	0.127598165030237	0.232377797279344
MIX27	0.297200884132995	0.0952233167035766	0.117140718378198	0.108987454977492	0.118741298786702	0.262706327021037
MIX28	0.343629628430496	0.123426536169008	0.207862449036521	0.00715106822046956	0.264551653089127	0.0533786650543776
MIX29	0.064353908949476	0.0988409794091816	0.066044629480507	0.162416283069681	0.291467083069648	0.316877116021506
MIX30	0.238650209018253	0.0725169103253097	0.209548733219126	0.0251402029304824	0.124062391319228	0.3300815531876
MIX31	0.0570279560270022	0.0326105049518554	0.16599464709657	0.349652825934459	0.164621866652067	0.230092199338046
MIX32	0.216714497323585	0.171684372957963	0.112125474774455	0.180483640578225	0.0839984779516663	0.234993536414106
MIX33	0.121825695550326	0.257540463192392	0.0371550664216643	0.103628656371307	0.218015816618983	0.261834301845328
MIX34	0.0869091366674102	0.0870488678724874	0.228277833514389	0.16303768960608	0.183175842808692	0.251550629530941
MIX35	0.163277824108307	0.0343128941844072	0.282458435441559	0.195615642465253	0.0666158009728732	0.257719402827601
MIX36	0.169917841833745	0.000926829114475246	0.173616296425948	0.214528956926566	0.273469107220768	0.167540968478498
MIX37	0.0358361533522537	0.085386084553264	0.255310025718152	0.245107895182046	0.226403280995512	0.151956560198772
MIX38	0.251731813331289	0.125162858695324	0.136106968680657	0.194320252502246	0.0725380187070589	0.220140088083426
MIX39	0.31899037868163	0.00186223718283421	0.1414223901171	0.246799350282883	0.21729649361063	0.0736291501249232
MIX40	0.114494730905519	0.052873531667924	0.263628951283251	0.113595076513593	0.219952052569522	0.235455657060191
MIX41	0.0267268371156765	0.387514063472396	0.231982588980677	0.034283485711118	0.00168299777362461	0.317810026946508
MIX42	0.181582280276807	0.215413234068747	0.17037860038414	0.129788496314695	0.126369507858462	0.17646788109715
MIX43	0.21444425073585	0.0665376655652393	0.171349053214541	0.113619078592273	0.232208073222937	0.20184187866916
MIX44	0.174707181460821	0.155846636786764	0.143195879187098	0.139882403654393	0.195283932349586	0.191083966561337
MIX45	0.236875516386409	0.100874646594558	0.178538489569661	0.193540808213574	0.069545151864357	0.220625387371441
MIX46	0.134355914026918	0.00324989805234254	0.437686117740048	0.175170200329697	0.0563319080696713	0.193205961781323
MIX47	0.0912582317466554	0.439835681493634	0.0875407005997303	0.288521937679675	0.0618472876234486	0.0309961608568563
MIX48	0.238864264286605	0.0781654417459156	0.302558650800038	0.0707680183263034	0.197067512135395	0.112576112705744
MIX49	0.293687104120074	0.268974104237408	0.0184816227984369	0.196546838681044	0.0543543415794239	0.167955988583614
MIX50	0.259547360625046	0.136148006835223	0.285181796369095	0.221566529215838	0.045509622855773	0.0520466840990249
MIX51	0.31658868292766	0.0546592080467902	0.269161107155102	0.184526789448054	0.137652843276873	0.0374113691455208
MIX52	0.2445421872926	0.242217720393862	0.208498911356508	0.0501290535298687	0.196797746896343	0.057814380530819
MIX53	0.262008875280723	0.0506634931389295	0.0760833638492179	0.210195750164006	0.187885354622522	0.213163162944601
MIX54	0.0940912409227418	0.250103166498844	0.0733685467116024	0.221243831010834	0.171315813191718	0.18987740166426
MIX55	0.087971539408776	0.097037895981348	0.248160404758818	0.152673727343533	0.0994387886311161	0.314717643876409
MIX56	0.221966042698468	0.242126343317754	0.0349637934694083	0.0418013978503828	0.161621966928838	0.297520455735149
MIX57	0.162536106748655	0.237623594448437	0.0460174995333699	0.1107245608024	0.274056003364139	0.169042235102999
MIX58	0.0933188986101604	0.264386190717203	0.226909026379499	0.272455989533808	0.120130843312915	0.0227990514464149
MIX59	0.12403550369241	0.141844911870703	0.29322463877528	0.23772231152815	0.064631311422751	0.138541322710706
MIX60	0.214277069312411	0.138388259144801	0.177236631919096	0.162585476380337	0.1281968103874	0.179315752855955
MIX61	0.0270998050869374	0.208698629202024	0.0314292788757731	0.279859871718533	0.257145322316716	0.195767092800016
MIX62	0.0316032351740708	0.309969694135865	0.278696710737662	0.120496351445485	0.0923463590049685	0.166887649501948
MIX63	0.192557839515301	0.202516256181042	0.155096296643663	0.155818121075715	0.116383088822759	0.177628397761521
MIX64	0.148005813943997	0.0317797499457436	0.142638306356585	0.0261304653995006	0.31225222030228	0.339193444051893
MIX65	0.331323343288957	0.114464169486805	0.234063092474652	0.0354592149165987	0.212688954698346	0.07200122513464
MIX66	0.107226364218096	0.054365011924852	0.461560401607094	0.149540438966551	0.06789095768946	0.159416825593946
MIX67	0.00859701994254633	0.357045914720765	0.177109963046351	0.129592725067014	0.0275244460032995	0.300129931220025
MIX68	0.183124143374215	0.186484921306486	0.290339751724127	0.15085573620612	0.104725664061935	0.0844697833271178
MIX69	0.290845475863522	0.0446023694555372	0.0895090852168155	0.0459116434303518	0.186345829358319	0.342785596675455
MIX70	0.2186039976787	0.12773775777187	0.0390186643729031	0.238833899205224	0.253249836935889	0.122555844035414
MIX71	0.199450077033132	0.203680982416887	0.0811317381327974	0.222275328861301	0.211075973570492	0.0823858999853906
MIX72	0.143095069975827	0.13949391416033	0.266110126411087	0.271540036239518	0.125210702238859	0.0545501509743793
MIX73	0.172103863980913	0.16590492266558	0.0677829326302875	0.241246002632187	0.302220468464278	0.0507418096267537
MIX74	0.104890343814277	0.24341409462706	0.182073813148716	0.191806793124209	0.195613857657481	0.0822010976282564
MIX75	0.360611162217894	0.0570481996118522	0.064316213578705	0.056083434997642	0.145686653209289	0.316254336384619
MIX76	0.0389879481644807	0.113814410236757	0.229459008038867	0.0734818109192833	0.188714163466308	0.355542659174304
MIX77	0.3247031905198	0.288567898828617	0.0297299448969233	0.000710256948521399	0.306897552835825	0.0493911559703133
MIX78	0.0429202343022631	0.0538304103449283	0.232303302910234	0.310041002082481	0.320433258947221	0.0404717914128715
MIX79	0.268330754998256	0.0972589025148948	0.104606601809833	0.176384907495019	0.224890508942143	0.128528324239854
MIX80	0.183457660866941	0.181059167065222	0.280746714715533	0.102613803429737	0.0656259229349424	0.186496730987625
MIX81	0.145617404736645	0.286346299041345	0.2204165886611	0.262594017325592	0.0406439501566436	0.0443817400786745
MIX82	0.304541528596283	0.125081888382765	0.0455485541471513	0.0306169286013624	0.317264651588917	0.176946448683521
MIX83	0.298181798667805	0.242652694292179	0.0263312186453942	0.226776445258025	0.0959395476691802	0.110118295467418
MIX84	0.13502872044137	0.17914988215016	0.0173284212420754	0.207620227318151	0.15615831699104	0.304714431857203
MIX85	0.0744303339038281	0.274767212783489	0.202893407753915	0.291956522533483	0.0290348680125784	0.126917655012706
MIX86	0.213199840883382	0.243681326897245	0.0820303897609717	0.0787917091450351	0.141317239012295	0.240979494301072
MIX87	0.0622671424043035	0.0995922903876306	0.179530794819033	0.277419338424162	0.179181501207521	0.202008932757349
MIX88	0.136016462921279	0.102430830079723	0.117063505136721	0.106213132707074	0.281249302106107	0.257026767049096
MIX89	0.076013621455137	0.136180386757436	0.256469366611498	0.137730282741683	0.204407616773246	0.189198725661
MIX90	0.18231056804774	0.18695507838516	0.0808496770075787	0.201327194432692	0.272773313884283	0.0757841682425469
MIX91	0.051534873345535	0.243067313187982	0.250630136270969	0.0669861727094628	0.145614422086122	0.242167082399929
MIX92	0.165638082864356	0.173800630495591	0.131171388720689	0.222344472945036	0.144983675598609	0.162061749375719
MIX93	0.172653219524837	0.267454922670098	0.0288512735450384	0.0733960609824315	0.310469298174045	0.14717522510355
MIX94	0.143293319856193	0.0540672372543408	0.303643240312999	0.0397584232786105	0.313122594785058	0.146115184512799
MIX95	0.134009930806938	0.173876251156763	0.0664412678402797	0.118364789441178	0.248466894880777	0.258840865874064
MIX96	0.192468310640915	0.217217197333643	0.284963480401777	0.191141878238725	0.0566068571733194	0.0576022762116192
MIX97	0.179055847142048	0.303336008155034	0.250619897310372	0.13469096994417	0.0405839028157371	0.0917133746326389
MIX98	0.084938192442128	0.223174860001311	0.306140442951685	0.102277648684143	0.074291902509166	0.209176953411566
MIX99	0.168568787448472	0.117104154763646	0.0397197353195381	0.362939721494411	0.203021036728911	0.108646564245023
MIX100	0.090957727682654	0.317225431905945	0.168591867250245	0.12802931666093	0.0360041234291303	0.259191533071095
MIX101	0.267379656315191	0.102478089879464	0.214660753159127	0.208200442622865	0.116025727765988	0.0912553302573634
MIX102	0.112731403026819	0.20056719288122	0.184900495517962	0.239770495835746	0.117070460426002	0.14495995231225
MIX103	0.0729627566097782	0.142741940062683	0.26135380564869	0.174944884034877	0.263497258040898	0.0844993556030744
MIX104	0.140589491689702	0.409106674404309	0.0827937355425808	0.3110064054849	0.0215425123694846	0.0349611805090242
MIX105	0.0354342535224516	0.0623917354183283	0.27474041016798	0.0989044445836813	0.306612339025887	0.221916817281672
MIX106	0.102894932059667	0.098184632858416	0.0136938074602585	0.376262051654174	0.256485564311077	0.152479011656408
MIX107	0.205718368289475	0.269086004600654	0.295813085099793	0.146375065218954	0.0727015517659206	0.0103059250252031
MIX108	0.22986861030817	0.167352160958356	0.0269094290074702	0.221148372155057	0.226085661451663	0.128635766119283
MIX109	0.0118592233394617	0.264831779416828	0.294417485122502	0.00600010778296896	0.278738487666325	0.144152916671913
MIX110	0.0944017844826424	0.215979599991685	0.22916006021969	0.049646667454725	0.226917350134108	0.183894537717149
MIX111	0.013686519870316	0.227840430312024	0.216459394587346	0.186176514204854	0.0867394761529176	0.269097664872543
MIX112	0.140853252210096	0.171893004514102	0.178036203049866	0.159125254725336	0.173800569409638	0.176291716090962
MIX113	0.140622997021097	0.264903658393187	0.028731060614598	0.154897967797461	0.11452170276139	0.296322613412267
MIX114	0.219435633568881	0.208220232716627	0.218589993593605	0.170712744736403	0.104634413700049	0.0784069816844352
MIX115	0.310567193330354	0.125209768493074	0.0979235640082434	0.173375716943125	0.166977552892721	0.125946204332483
MIX116	0.072433014789879	0.251407577684718	0.118864646819711	0.0811386980239723	0.238223819298153	0.237932243383566
MIX117	0.134319273910969	0.0451581092630663	0.256965758553981	0.187381471418491	0.129310086977219	0.246865299876274
MIX118	0.0192456488177528	0.250374446260148	0.262550822003675	0.194966092889163	0.185694696742375	0.0871682932868869
MIX119	0.0729569881089756	0.221782872692465	0.059425759390057	0.202802833901012	0.240730025462572	0.202301520444918
MIX120	0.239532641240126	0.132488679765962	0.112505268525318	0.121587765470621	0.0584835204117011	0.335402124586272
MIX121	0.337617794336773	0.151392822079633	0.00802116323013987	0.0115275390757294	0.184723451432329	0.306717229845395
MIX122	0.0783413149977874	0.234594722106079	0.210049609560129	0.143594122929495	0.156998443871577	0.176421786534933
MIX123	0.280942816186801	0.0361091765982301	0.0389758949013343	0.246612291158777	0.222343770602575	0.175016050552283
MIX124	0.0365318883047176	0.0837106807483809	0.310626190939298	0.232625872022173	0.308666432837669	0.0278389351477615
MIX125	0.22553733285197	0.083052958838957	0.169232320659456	0.242053194738515	0.026276911404732	0.253847281506371
MIX126	0.292166473261885	0.00273049178349233	0.117370418465678	0.0186627058543592	0.225888562533052	0.343181348101533
MIX127	0.129178209016166	0.12490470489208	0.355629916303111	0.204877741273543	0.0322225509622377	0.153186877552863
MIX128	0.242040741819838	0.186422038439521	0.148267595493113	0.24959874196644	0.146357652778713	0.0273132295023737
MIX129	0.197143976818661	0.236361428510888	0.224658812247526	0.219245472091707	0.073873458122904	0.0487168522083125
MIX130	0.0875164705738414	0.237673765731397	0.203526296628182	0.321646877895897	0.102407085307104	0.0472295038635786
MIX131	0.0979324138847111	0.0496476382001854	0.0651398942856043	0.321037565496387	0.224792387636302	0.24145010049681
MIX132	0.177758552056844	0.00279103392038893	0.318107273078074	0.220155369239357	0.19182892087073	0.0893588508346062
MIX133	0.120498436449401	0.235523639637806	0.384840597690513	0.0567593923096988	0.182584915486399	0.0197930184261819
MIX134	0.23318402951304	0.216663321351019	0.164031699221802	0.0166376359549323	0.0700334883527225	0.299449825606484
MIX135	0.0698215427308446	0.355456518969583	0.262530623875165	0.0531194967176941	0.0703002500911055	0.188771567615607
MIX136	0.21216966936043	0.163548125478279	0.142230257826438	0.227807132991825	0.0369432594819223	0.217301554861106
MIX137	0.194210185765316	0.0529414108230652	0.0506883147943914	0.256476620053256	0.185328698855075	0.260354769708896
MIX138	0.103352405645639	0.277753621056784	0.273236073569571	0.067431194081587	0.128610683928513	0.149616021717907
MIX139	0.016517328356372	0.0955060436915085	0.0888603397566569	0.176553247453826	0.491776191998096	0.13078684874354
MIX140	0.0214030598810093	0.184404786198568	0.132918127965549	0.21564816699038	0.138246515363687	0.307379343600807
MIX141	0.0618303179228742	0.142494250385119	0.0239038837289619	0.28576762592039	0.255854986113283	0.230148935929372
MIX142	0.26174913555492	0.0285696319801834	0.280980376337815	0.179670714468841	0.235249325831859	0.0137808158263811
MIX143	0.117490958749426	0.0869183225081738	0.197049977318266	0.0142662839547701	0.29881809360901	0.285456363860355
MIX144	0.24260889531703	0.0842164196427679	0.238626491614963	0.0224285333891014	0.17970893929394	0.232410720742197
MIX145	0.216004262185331	0.22473527544636	0.0685197539106136	0.232924172210502	0.080429876990804	0.177386659256389
MIX146	0.143227990560462	0.127084861111251	0.259802184682291	0.262772110333352	0.158739283764855	0.0483735695477894
MIX147	0.20119691558553	0.110525837631553	0.235705612245562	0.262748185953208	0.184814008583645	0.00500944000050186
MIX148	0.293512951762292	0.296059981437494	0.168257981074275	0.0539183336758019	0.156466731677051	0.031784020373086
MIX149	0.0341151046002016	0.0162057716510936	0.0794405201573033	0.323855140337834	0.289735298211381	0.256648165042187
MIX150	0.00468453410533043	0.26774980886127	0.178824367077929	0.135922178965563	0.360763048593767	0.0520560623961408
MIX151	0.291762336636126	0.0813307116255572	0.228008335190524	0.0889489999373098	0.169961819121844	0.139987797488639
MIX152	0.220294674735846	0.0828821208630867	0.0739346858505397	0.264882170684966	0.130959660907895	0.227046686957666
MIX153	0.211276779126395	0.133523489844245	0.129706014719357	0.162985247174461	0.192603719200201	0.169904749935342
MIX154	0.159476688848217	0.132321063718859	0.220983947018585	0.244216000198587	0.125702587206861	0.117299713008892
MIX155	0.296783223274567	0.0447713441817999	0.372953772784476	0.0812053045118117	0.155779897363656	0.0485064578836897
MIX156	0.172111161824158	0.149785582972916	0.115396367118966	0.423720611520949	0.0940636337169572	0.0449226428460531
MIX157	0.0779019225626957	0.210970496227339	0.122332683893917	0.186239282129248	0.25481882774662	0.14773678744018
MIX158	0.339993989810237	0.00429300303867482	0.0295747468040557	0.243314479824277	0.118971250212747	0.263852530310008
MIX159	0.0979849195326815	0.211218083369101	0.132543005957376	0.139035278642466	0.249016375546504	0.170202336951871
MIX160	0.142919724665865	0.161337959385701	0.270809077547166	0.224963280893743	0.0789354437639011	0.121034513743624
MIX161	0.137593075721302	0.0275284118133286	0.0616178756935939	0.259749875423445	0.28043477703303	0.233075984315301
MIX162	0.187863541237646	0.186852646259726	0.113096457546895	0.0374126097676071	0.247180161007457	0.227594584180668
MIX163	0.283422504591714	0.187072890348828	0.117336162505074	0.148196413553402	0.0648026326733951	0.199169396327587
MIX164	0.244544808716297	0.0236283543013966	0.0201711295837404	0.0197540668977519	0.446234886818331	0.245666753682483
MIX165	0.216539524180988	0.174424258326549	0.213066376585209	0.217929346302702	0.164968896560671	0.0130715980438809
MIX166	0.0767380182509989	0.142570183234321	0.127733282449302	0.273510222452448	0.16254006097623	0.216908232636699
MIX167	0.179018179815357	0.260071691380579	0.0866036702552766	0.0215416294472686	0.248030277581894	0.204734551519626
MIX168	0.129177290889512	0.140020825350275	0.239599777715774	0.200055948633987	0.245908324564916	0.0452378328455355
MIX169	0.123509169912005	0.220522636341023	0.126641053982187	0.117061567658245	0.270447362800844	0.141818209305696
MIX170	0.330438471575536	0.271310478791452	0.0169669380884418	0.0823019956161725	0.235927913683387	0.06305420224501
MIX171	0.208580896064182	0.0439166195486698	0.226488854367665	0.0791272487307691	0.231632522519957	0.210253858768757
MIX172	0.23380724195757	0.193606592087816	0.201131500844316	0.0914704890231152	0.0366826266992031	0.243301549387979
MIX173	0.0524657125941072	0.293763519101382	0.0399883851743146	0.268360795830251	0.175371823173636	0.17004976412631
MIX174	0.193514636180719	0.25298518328055	0.179185801419115	0.204075187613317	0.0848742326364387	0.0853649588698601
MIX175	0.192211199895041	0.245152158940859	0.00236911435453144	0.290060212154892	0.116596060188056	0.15361125446662
MIX176	0.0472269980276989	0.167470432897497	0.261000559451005	0.127995586905269	0.273869423442101	0.122436999276428
MIX177	0.273550458457659	0.111112934659662	0.169259424560179	0.0965063915565964	0.253965575846088	0.0956052149198158
MIX178	0.230666821507536	0.150191103851992	0.256865498273794	0.256002097044629	0.0986024558154168	0.00767202350663155
MIX179	0.371064953149483	0.175052562365018	0.0900071599186318	0.14136933203688	0.194351306976071	0.0281546855539167
MIX180	0.0802693930714496	0.037732108677342	0.123661655989436	0.128389675624621	0.313340420970936	0.316606745666215
MIX181	0.17777312039834	0.183520677516614	0.147199077902639	0.174295908896582	0.157825505360126	0.1593857099257
MIX182	0.22126789336476	0.119138444040331	0.111998913129612	0.253634141140001	0.238796955696125	0.0551636526291709
MIX183	0.106474486736095	0.208159143456081	0.201850335075861	0.117418058059308	0.227403620301491	0.138694356371165
MIX184	0.205466787038242	0.311116459690292	0.0245182068035565	0.0944375892123368	0.104723233231837	0.259737724023735
MIX185	0.0107258586452884	0.113911222170565	0.329046372550576	0.290230178409669	0.0685071434936601	0.187579224730241
MIX186	0.0624761636548771	0.256409463357575	0.115784370465362	0.250390498761213	0.213736622716269	0.101202881044704
MIX187	0.258979439363636	0.0944087789543549	0.157974326717076	0.153413380605789	0.14566174523992	0.189562329119225
MIX188	0.291569763834807	0.0733313690613547	0.169807681261415	0.0461956416108852	0.284715377775644	0.134380166455894
MIX189	0.231744204505447	0.205542115361385	0.211002263687289	0.260365473616946	0.0396312764571084	0.051714666371825
MIX190	0.126503577137537	0.0535016730521123	0.180445466226592	0.261817215138358	0.109015498279435	0.268716570165965
MIX191	0.274075708611843	0.0205820805278659	0.0719830554451659	0.19696487300731	0.223547222306659	0.212847060101156
MIX192	0.322512957573366	0.038126357591193	0.185592323936806	0.117970262867609	0.167333025834594	0.168465072196431
MIX193	0.0800031353099582	0.196090933931769	0.487318861660403	0.00298333356539682	0.147484416661344	0.0861193188711293
MIX194	0.256545134821264	0.0997980515701617	0.114755459612005	0.0340432023878401	0.246896682895587	0.247961468713142
MIX195	0.00728733197811068	0.251975534253581	0.246713776640121	0.246337999193543	0.147453701348147	0.100231656586497
MIX196	0.12852684002009	0.0435793704044627	0.194114965879784	0.209426004209936	0.0158748638581242	0.408477955627603
MIX197	0.0610734017533491	0.256621149065916	0.155430223458317	0.110360625844734	0.257047151241487	0.159467448636196
MIX198	0.0748073753890718	0.0980147644058552	0.14206752608253	0.308581437634723	0.0686545406993884	0.307874355788432
MIX199	0.0916013440889899	0.142002040581837	0.233520156221026	0.205337752978928	0.172020681996188	0.155518024133032
MIX200	0.167351910752862	0.113618752630222	0.0885816942557092	0.241567443055316	0.30171217247007	0.0871680268358206

## Sheet: Immune_cells_WGBS
	Neutrophil	Natural killer cell	B-cell	CD4+ T-cell	CD8+ T-cell	Monocyte
MIX1	0.2994519973092	0.21745566263938	0.133345945347742	0.220293315730672	0.111331933873057	0.0181211450999486
MIX2	0.0782099069454311	0.370916980694488	0.115233794792221	0.0784172244562534	0.311001918233848	0.0462201748777589
MIX3	0.287092678760309	0.023189632388307	0.228650420824481	0.211022025307539	0.0580914795559525	0.191953763163411
MIX4	0.240825554605746	0.241713976506494	0.0266296907170618	0.322570442282708	0.0322190806489392	0.136041255239051
MIX5	0.204530691223263	0.021702803886893	0.248222464526428	0.280177710612782	0.0741241403419133	0.171242189408722
MIX6	0.188129892814899	0.0972879609350207	0.13688632317641	0.0685334388788904	0.24302209621233	0.26614028798245
MIX7	0.0153241549893917	0.39373254725939	0.129164766232137	0.340212623532898	0.0482542791090967	0.0733116288770865
MIX8	0.201018598342648	0.109995774043595	0.232201950023685	0.202532322130584	0.211262078784068	0.0429892766754193
MIX9	0.0704202028601274	0.128744939615708	0.261651239737289	0.221466377967333	0.13239706947608	0.185320170343463
MIX10	0.208996822005931	0.109127466389787	0.230568920081304	0.178252686708546	0.186534042235787	0.0865200625786451
MIX11	0.181529366660975	0.00395749147422349	0.177662901061571	0.159005502334034	0.150891897154884	0.326952841314313
MIX12	0.182882673994733	0.260047426601393	0.145597148459636	0.0753242080145832	0.142491221103112	0.193657321826543
MIX13	0.308533131953667	0.112744771210335	0.200740042361348	0.091993607876234	0.000414261945635675	0.285574184652781
MIX14	0.198686608375034	0.247175834458135	0.0529371886101127	0.0462194890737021	0.218390670185934	0.236590209297083
MIX15	0.0919306616856261	0.179062072067803	0.198328363454685	0.221121884872058	0.164594696014097	0.14496232190573
MIX16	0.309547096304382	0.110724371731933	0.180938151110194	0.0814214602599799	0.103672258209048	0.213696662384463
MIX17	0.23574306205768	0.233429417883661	0.227191778907082	0.166334010446705	0.0837046155263416	0.0535971151785307
MIX18	0.242975276565435	0.126471985637736	0.00301210438034944	0.168917189136656	0.359042393643296	0.0995810506365265
MIX19	0.28005375922103	0.0885340999946571	0.0437753405005482	0.10443238620738	0.202635854997031	0.280568559079355
MIX20	0.0192516385207799	0.28724312229753	0.0490112871495915	0.0980862286844854	0.260658538666879	0.285749184680734
MIX21	0.159417285167966	0.176788823144767	0.124222254092227	0.0859529197414202	0.229251904898068	0.224366812955551
MIX22	0.217639725248709	0.188575326907021	0.226476581448454	0.0611216705227314	0.210308558163588	0.0958781377094967
MIX23	0.10465869876349	0.257148166342642	0.066761753543727	0.139034303417709	0.183551089759444	0.248845988172988
MIX24	0.139998921639766	0.178002748492313	0.271216594969888	0.0795245962439895	0.229228891807928	0.102028246846115
MIX25	0.0453540349945689	0.0394345044038655	0.118979643101736	0.120173210183936	0.129013587679974	0.547045019635919
MIX26	0.293188705775748	0.184854654352684	0.146913438441058	0.0150672391209291	0.127598165030237	0.232377797279344
MIX27	0.297200884132995	0.0952233167035766	0.117140718378198	0.108987454977492	0.118741298786702	0.262706327021037
MIX28	0.343629628430496	0.123426536169008	0.207862449036521	0.00715106822046956	0.264551653089127	0.0533786650543776
MIX29	0.064353908949476	0.0988409794091816	0.066044629480507	0.162416283069681	0.291467083069648	0.316877116021506
MIX30	0.238650209018253	0.0725169103253097	0.209548733219126	0.0251402029304824	0.124062391319228	0.3300815531876
MIX31	0.0570279560270022	0.0326105049518554	0.16599464709657	0.349652825934459	0.164621866652067	0.230092199338046
MIX32	0.216714497323585	0.171684372957963	0.112125474774455	0.180483640578225	0.0839984779516663	0.234993536414106
MIX33	0.121825695550326	0.257540463192392	0.0371550664216643	0.103628656371307	0.218015816618983	0.261834301845328
MIX34	0.0869091366674102	0.0870488678724874	0.228277833514389	0.16303768960608	0.183175842808692	0.251550629530941
MIX35	0.163277824108307	0.0343128941844072	0.282458435441559	0.195615642465253	0.0666158009728732	0.257719402827601
MIX36	0.169917841833745	0.000926829114475246	0.173616296425948	0.214528956926566	0.273469107220768	0.167540968478498
MIX37	0.0358361533522537	0.085386084553264	0.255310025718152	0.245107895182046	0.226403280995512	0.151956560198772
MIX38	0.251731813331289	0.125162858695324	0.136106968680657	0.194320252502246	0.0725380187070589	0.220140088083426
MIX39	0.31899037868163	0.00186223718283421	0.1414223901171	0.246799350282883	0.21729649361063	0.0736291501249232
MIX40	0.114494730905519	0.052873531667924	0.263628951283251	0.113595076513593	0.219952052569522	0.235455657060191
MIX41	0.0267268371156765	0.387514063472396	0.231982588980677	0.034283485711118	0.00168299777362461	0.317810026946508
MIX42	0.181582280276807	0.215413234068747	0.17037860038414	0.129788496314695	0.126369507858462	0.17646788109715
MIX43	0.21444425073585	0.0665376655652393	0.171349053214541	0.113619078592273	0.232208073222937	0.20184187866916
MIX44	0.174707181460821	0.155846636786764	0.143195879187098	0.139882403654393	0.195283932349586	0.191083966561337
MIX45	0.236875516386409	0.100874646594558	0.178538489569661	0.193540808213574	0.069545151864357	0.220625387371441
MIX46	0.134355914026918	0.00324989805234254	0.437686117740048	0.175170200329697	0.0563319080696713	0.193205961781323
MIX47	0.238864264286605	0.0781654417459156	0.302558650800038	0.0707680183263034	0.197067512135395	0.112576112705744
MIX48	0.293687104120074	0.268974104237408	0.0184816227984369	0.196546838681044	0.0543543415794239	0.167955988583614
MIX49	0.259547360625046	0.136148006835223	0.285181796369095	0.221566529215838	0.045509622855773	0.0520466840990249
MIX50	0.31658868292766	0.0546592080467902	0.269161107155102	0.184526789448054	0.137652843276873	0.0374113691455208
MIX51	0.2445421872926	0.242217720393862	0.208498911356508	0.0501290535298687	0.196797746896343	0.057814380530819
MIX52	0.262008875280723	0.0506634931389295	0.0760833638492179	0.210195750164006	0.187885354622522	0.213163162944601
MIX53	0.0940912409227418	0.250103166498844	0.0733685467116024	0.221243831010834	0.171315813191718	0.18987740166426
MIX54	0.087971539408776	0.097037895981348	0.248160404758818	0.152673727343533	0.0994387886311161	0.314717643876409
MIX55	0.221966042698468	0.242126343317754	0.0349637934694083	0.0418013978503828	0.161621966928838	0.297520455735149
MIX56	0.162536106748655	0.237623594448437	0.0460174995333699	0.1107245608024	0.274056003364139	0.169042235102999
MIX57	0.0933188986101604	0.264386190717203	0.226909026379499	0.272455989533808	0.120130843312915	0.0227990514464149
MIX58	0.12403550369241	0.141844911870703	0.29322463877528	0.23772231152815	0.064631311422751	0.138541322710706
MIX59	0.214277069312411	0.138388259144801	0.177236631919096	0.162585476380337	0.1281968103874	0.179315752855955
MIX60	0.0270998050869374	0.208698629202024	0.0314292788757731	0.279859871718533	0.257145322316716	0.195767092800016
MIX61	0.0316032351740708	0.309969694135865	0.278696710737662	0.120496351445485	0.0923463590049685	0.166887649501948
MIX62	0.192557839515301	0.202516256181042	0.155096296643663	0.155818121075715	0.116383088822759	0.177628397761521
MIX63	0.148005813943997	0.0317797499457436	0.142638306356585	0.0261304653995006	0.31225222030228	0.339193444051893
MIX64	0.331323343288957	0.114464169486805	0.234063092474652	0.0354592149165987	0.212688954698346	0.07200122513464
MIX65	0.107226364218096	0.054365011924852	0.461560401607094	0.149540438966551	0.06789095768946	0.159416825593946
MIX66	0.00859701994254633	0.357045914720765	0.177109963046351	0.129592725067014	0.0275244460032995	0.300129931220025
MIX67	0.183124143374215	0.186484921306486	0.290339751724127	0.15085573620612	0.104725664061935	0.0844697833271178
MIX68	0.290845475863522	0.0446023694555372	0.0895090852168155	0.0459116434303518	0.186345829358319	0.342785596675455
MIX69	0.2186039976787	0.12773775777187	0.0390186643729031	0.238833899205224	0.253249836935889	0.122555844035414
MIX70	0.199450077033132	0.203680982416887	0.0811317381327974	0.222275328861301	0.211075973570492	0.0823858999853906
MIX71	0.143095069975827	0.13949391416033	0.266110126411087	0.271540036239518	0.125210702238859	0.0545501509743793
MIX72	0.172103863980913	0.16590492266558	0.0677829326302875	0.241246002632187	0.302220468464278	0.0507418096267537
MIX73	0.104890343814277	0.24341409462706	0.182073813148716	0.191806793124209	0.195613857657481	0.0822010976282564
MIX74	0.360611162217894	0.0570481996118522	0.064316213578705	0.056083434997642	0.145686653209289	0.316254336384619
MIX75	0.0389879481644807	0.113814410236757	0.229459008038867	0.0734818109192833	0.188714163466308	0.355542659174304
MIX76	0.3247031905198	0.288567898828617	0.0297299448969233	0.000710256948521399	0.306897552835825	0.0493911559703133
MIX77	0.0429202343022631	0.0538304103449283	0.232303302910234	0.310041002082481	0.320433258947221	0.0404717914128715
MIX78	0.268330754998256	0.0972589025148948	0.104606601809833	0.176384907495019	0.224890508942143	0.128528324239854
MIX79	0.183457660866941	0.181059167065222	0.280746714715533	0.102613803429737	0.0656259229349424	0.186496730987625
MIX80	0.145617404736645	0.286346299041345	0.2204165886611	0.262594017325592	0.0406439501566436	0.0443817400786745
MIX81	0.304541528596283	0.125081888382765	0.0455485541471513	0.0306169286013624	0.317264651588917	0.176946448683521
MIX82	0.298181798667805	0.242652694292179	0.0263312186453942	0.226776445258025	0.0959395476691802	0.110118295467418
MIX83	0.13502872044137	0.17914988215016	0.0173284212420754	0.207620227318151	0.15615831699104	0.304714431857203
MIX84	0.0744303339038281	0.274767212783489	0.202893407753915	0.291956522533483	0.0290348680125784	0.126917655012706
MIX85	0.213199840883382	0.243681326897245	0.0820303897609717	0.0787917091450351	0.141317239012295	0.240979494301072
MIX86	0.0622671424043035	0.0995922903876306	0.179530794819033	0.277419338424162	0.179181501207521	0.202008932757349
MIX87	0.136016462921279	0.102430830079723	0.117063505136721	0.106213132707074	0.281249302106107	0.257026767049096
MIX88	0.076013621455137	0.136180386757436	0.256469366611498	0.137730282741683	0.204407616773246	0.189198725661
MIX89	0.18231056804774	0.18695507838516	0.0808496770075787	0.201327194432692	0.272773313884283	0.0757841682425469
MIX90	0.051534873345535	0.243067313187982	0.250630136270969	0.0669861727094628	0.145614422086122	0.242167082399929
MIX91	0.165638082864356	0.173800630495591	0.131171388720689	0.222344472945036	0.144983675598609	0.162061749375719
MIX92	0.172653219524837	0.267454922670098	0.0288512735450384	0.0733960609824315	0.310469298174045	0.14717522510355
MIX93	0.143293319856193	0.0540672372543408	0.303643240312999	0.0397584232786105	0.313122594785058	0.146115184512799
MIX94	0.134009930806938	0.173876251156763	0.0664412678402797	0.118364789441178	0.248466894880777	0.258840865874064
MIX95	0.192468310640915	0.217217197333643	0.284963480401777	0.191141878238725	0.0566068571733194	0.0576022762116192
MIX96	0.179055847142048	0.303336008155034	0.250619897310372	0.13469096994417	0.0405839028157371	0.0917133746326389
MIX97	0.084938192442128	0.223174860001311	0.306140442951685	0.102277648684143	0.074291902509166	0.209176953411566
MIX98	0.168568787448472	0.117104154763646	0.0397197353195381	0.362939721494411	0.203021036728911	0.108646564245023
MIX99	0.090957727682654	0.317225431905945	0.168591867250245	0.12802931666093	0.0360041234291303	0.259191533071095
MIX100	0.267379656315191	0.102478089879464	0.214660753159127	0.208200442622865	0.116025727765988	0.0912553302573634

## Sheet: WGBS_varying_seq_depth
	CD4+ T-cell	CD8+ T-cell	Natural killer cell	Monocyte	Neutrophil	B-cell
MIX1	0.1634	0.1504	0.0485	0.2487	0.1438	0.2452
MIX2	0.0246	0.0929	0.0022	0.4082	0.4684	0.0037
MIX3	0.1004	0.0108	0.0336	0.3367	0.1942	0.3243
MIX4	0.1557	0.101	0.1037	0.1933	0.1345	0.3118
MIX5	0.3185	0.048	0.0061	0.2612	0.2988	0.0674
MIX6	0.0885	0.1762	0.08	0.1623	0.1082	0.3848
MIX7	0.0059	0.1168	0.0582	0.2881	0.1938	0.3372
MIX8	0.075	0.0325	0.1054	0.408	0.1179	0.2612
MIX9	0.1441	0.0339	0.1234	0.2562	0.1547	0.2877
MIX10	0.1293	0.1567	0.0115	0.2483	0.3951	0.0591
MIX11	0.1912	0.0881	0.1045	0.4901	0.1127	0.0134
MIX12	0.0905	0.1835	0.0766	0.1908	0.1477	0.3109
MIX13	0.1415	0.2186	0.1424	0.1712	0.2331	0.0932
MIX14	0.0837	0.3353	0.0504	0.0597	0.2933	0.1776
MIX15	0.1425	0.1917	0.0013	0.405	0.2244	0.0351
MIX16	0.1452	0.087	0.0035	0.4509	0.1925	0.1209
MIX17	0.1885	0.0451	0.0345	0.411	0.1985	0.1224
MIX18	0.2577	0.092	0.0693	0.082	0.1796	0.3194
MIX19	0.0692	0.0255	0.0071	0.3329	0.3815	0.1838
MIX20	0.1902	0.1622	0.0752	0.1793	0.3598	0.0333
