# Supplementary material for: Benchmarking of Methods for DNA Methylome Deconvolution
Source: Research Square preprint supplement (doi:10.21203/rs.3.rs-3470543/v1), 2023-10-31
Supplement: Supplementary file 4 [file bd1f946937f672e8e4a7fa66.xlsx]

## Sheet: Tissues_450k
Tissue	Control	Validation
Blood	GSE48472	GSE84003
Kidney	GSE59157	GSE50874
Liver	GSE61258	GSE61278
Small intestine	GSE73832	GSE50475

## Sheet: Immune_cells_450k
Cell type	Control	Validation
Monocyte	GSE71244	GSE35069, GSE77445
CD8+ T-cell	GSE71244	GSE35069, GSE77445
CD4+ T-cell	GSE71244	GSE35069, GSE77445
B-cell	GSE71244	GSE35069, GSE77445
Neutrophil	GSE65097	GSE35069, GSE77445
Natural killer cell	GSE110554	GSE35069, GSE77445

## Sheet: Immune_cells_850k
Cell type	Control	Validation
Monocyte	GSE110544	GSE103541
CD8+ T-cell	GSE110544	GSE103541
CD4+ T-cell	GSE110544	GSE103541
B-cell	GSE110544	GSE103541
Neutrophil	GSE110544	GSE103541
Natural killer cell	GSE110544	GSE129376

## Sheet: Immune_cells_WGBS
Cell type	Control	Validation
Monocyte	GSE186348	EGAD00001001261
CD8+ T-cell	GSE186348	EGAD00001001189
CD4+ T-cell	GSE186348	EGAD00001002460
B-cell	GSE186348	EGAD00001000710
Neutrophil	GSE186348	EGAD00001002508
Natural killer cell	GSE186348	EGAD00001001473
