# Supplementary material for: Benchmarking of Methods for DNA Methylome Deconvolution
Source: Research Square preprint supplement (doi:10.21203/rs.3.rs-3470543/v1), 2023-10-31
Supplement: Supplementary file 5 [file e793ce924dfbe1d1f9786874.xlsx]

## Sheet: Blad1
Method	Algorithm
None	No normalization is applied
(Column) Z-score
(Column) Min-max scaling
Quantile normalization	Sort and rank values per column. Then, reassign values based on mean rank averages over all rows.
Log transformation
