# Supplementary material for: Benchmarking of Methods for DNA Methylome Deconvolution
Source: Research Square preprint supplement (doi:10.21203/rs.3.rs-3470543/v1), 2023-10-31
Supplement: Supplementary file 6 [file f45a73455a2fb0dab8afb382.xlsx]

## Sheet: Tissues_450k
CpG	Cell_type	Genome_build	Chromosome	Locus
cg08846870	Blood	GRCh37	chr19	15568360
cg01053463	Blood	GRCh37	chr1	26186087
cg12050271	Blood	GRCh37	chr1	2980399
cg25009327	Blood	GRCh37	chr7	148820504
cg18383585	Blood	GRCh37	chr1	162183582
cg27626141	Blood	GRCh37	chr8	103876469
cg00767000	Blood	GRCh37	chr16	87525307
cg07912251	Blood	GRCh37	chr12	107712194
cg02349669	Blood	GRCh37	chr5	115155524
cg23058998	Blood	GRCh37	chr5	149969579
cg03760457	Blood	GRCh37	chr15	70326230
cg27314669	Blood	GRCh37	chr1	156822430
cg26981809	Blood	GRCh37	chr17	45786512
cg10095114	Blood	GRCh37	chr7	66056659
cg10817615	Blood	GRCh37	chr11	45687277
cg21355201	Blood	GRCh37	chr17	48013067
cg19983801	Blood	GRCh37	chr3	195538730
cg01396065	Blood	GRCh37	chr3	193789440
cg20079298	Blood	GRCh37	chr15	40572326
cg24720336	Blood	GRCh37	chr1	151170427
cg24504954	Blood	GRCh37	chr3	61237217
cg00147172	Blood	GRCh37	chr22	46423604
cg16748008	Blood	GRCh37	chr7	27155002
cg25996553	Blood	GRCh37	chr8	13133084
cg10187692	Blood	GRCh37	chr8	100872131
cg25431399	Blood	GRCh37	chr3	160117091
cg25307665	Blood	GRCh37	chr7	27183694
cg03027241	Blood	GRCh37	chr20	49620453
cg03139204	Blood	GRCh37	chrX	46937658
cg00106685	Blood	GRCh37	chr3	52720133
cg14557185	Blood	GRCh37	chr3	149374763
cg19961545	Blood	GRCh37	chr2	54087066
cg01775802	Blood	GRCh37	chr14	72945461
cg17373656	Blood	GRCh37	chr21	45196239
cg02218809	Blood	GRCh37	chr16	29973300
cg03534375	Blood	GRCh37	chr3	57743163
cg17100943	Blood	GRCh37	chr19	6459300
cg00806311	Blood	GRCh37	chr1	244625112
cg11085454	Blood	GRCh37	chr17	46628404
cg22235407	Blood	GRCh37	chr15	66209223
cg07808087	Blood	GRCh37	chr4	15005913
cg20820767	Blood	GRCh37	chr1	45082840
cg00894378	Blood	GRCh37	chr10	104680152
cg05247914	Blood	GRCh37	chr19	35629701
cg19300307	Blood	GRCh37	chr13	99136580
cg26069837	Blood	GRCh37	chr10	32345445
cg15963463	Blood	GRCh37	chr1	25253237
cg08433504	Blood	GRCh37	chr15	39872071
cg12843448	Blood	GRCh37	chr3	193789466
cg13946767	Blood	GRCh37	chr1	153599671
cg08400159	Blood	GRCh37	chr20	45947786
cg03199239	Blood	GRCh37	chr19	2588553
cg04643437	Blood	GRCh37	chr12	14518655
cg05233373	Blood	GRCh37	chr2	161127261
cg23218354	Blood	GRCh37	chr1	2885244
cg08196561	Blood	GRCh37	chr16	87525539
cg22876699	Blood	GRCh37	chr3	46535972
cg17189020	Blood	GRCh37	chr17	3851391
cg12416290	Blood	GRCh37	chr3	137432762
cg18610205	Blood	GRCh37	chr12	51717960
cg08612011	Blood	GRCh37	chr12	50350299
cg06551697	Blood	GRCh37	chr17	56612362
cg06380123	Blood	GRCh37	chr12	51717978
cg27196695	Blood	GRCh37	chr10	134571377
cg00702417	Blood	GRCh37	chr1	6054867
cg06928741	Blood	GRCh37	chr6	31691430
cg07380416	Blood	GRCh37	chr11	60739172
cg09294072	Blood	GRCh37	chr14	106366523
cg17508434	Blood	GRCh37	chr7	97831974
cg03252499	Blood	GRCh37	chr11	124324477
cg25922751	Blood	GRCh37	chr12	124950720
cg13525026	Blood	GRCh37	chr17	18061071
cg25408950	Blood	GRCh37	chr1	198290080
cg26150514	Blood	GRCh37	chr15	96907209
cg02522196	Blood	GRCh37	chr12	44226393
cg02154531	Blood	GRCh37	chrX	71237000
cg02597698	Blood	GRCh37	chr22	30662987
cg27381584	Blood	GRCh37	chr17	80407749
cg09238199	Blood	GRCh37	chr13	111097777
cg07119472	Blood	GRCh37	chr12	51718011
cg11436362	Blood	GRCh37	chr11	67053929
cg13713155	Blood	GRCh37	chr4	3522139
cg17221813	Blood	GRCh37	chr20	61590823
cg08306955	Blood	GRCh37	chr6	25137971
cg11791526	Blood	GRCh37	chr11	67177042
cg26360402	Blood	GRCh37	chr14	105973994
cg14134003	Blood	GRCh37	chr9	88952877
cg00255726	Blood	GRCh37	chr8	21769114
cg26175287	Blood	GRCh37	chr14	95877009
cg01684248	Blood	GRCh37	chr16	86536239
cg02913521	Blood	GRCh37	chr2	131792238
cg09001226	Blood	GRCh37	chr6	32155082
cg15939182	Blood	GRCh37	chr6	141887594
cg18739675	Blood	GRCh37	chr2	43041125
cg20324199	Blood	GRCh37	chr9	96080326
cg25110523	Blood	GRCh37	chr6	31868025
cg03272225	Blood	GRCh37	chr19	17957106
cg19982684	Blood	GRCh37	chr3	128403035
cg06064964	Blood	GRCh37	chr20	62199181
cg03699843	Blood	GRCh37	chr16	50701064
cg26439963	Kidney	GRCh37	chr10	102587110
cg17480467	Kidney	GRCh37	chr10	102588959
cg20095124	Kidney	GRCh37	chr10	102588691
cg16574134	Kidney	GRCh37	chr10	102588315
cg14778235	Kidney	GRCh37	chr10	102589102
cg04436818	Kidney	GRCh37	chr10	102589545
cg18494190	Kidney	GRCh37	chr10	102589532
cg23206032	Kidney	GRCh37	chr10	102587844
cg13936452	Kidney	GRCh37	chr1	47911336
cg16781647	Kidney	GRCh37	chr2	73151595
cg25531836	Kidney	GRCh37	chr10	102586999
cg26156687	Kidney	GRCh37	chr10	102586168
cg02770534	Kidney	GRCh37	chr10	102586454
cg00221382	Kidney	GRCh37	chr16	54322308
cg12390895	Kidney	GRCh37	chr5	92946500
cg00256155	Kidney	GRCh37	chr1	47915647
cg06921011	Kidney	GRCh37	chr10	102589467
cg04685170	Kidney	GRCh37	chr7	95025855
cg23877608	Kidney	GRCh37	chr19	48823413
cg04264908	Kidney	GRCh37	chr17	35303330
cg26864230	Kidney	GRCh37	chr1	47911508
cg01064265	Kidney	GRCh37	chr16	55363058
cg22452170	Kidney	GRCh37	chr7	157427295
cg04832450	Kidney	GRCh37	chr16	84487078
cg18992570	Kidney	GRCh37	chr5	134662888
cg13750214	Kidney	GRCh37	chr19	1302619
cg16612423	Kidney	GRCh37	chr5	6491884
cg08841544	Kidney	GRCh37	chr2	9533755
cg24650915	Kidney	GRCh37	chr5	138299677
cg21429725	Kidney	GRCh37	chr3	196693809
cg27596297	Kidney	GRCh37	chr10	130844884
cg16139202	Kidney	GRCh37	chr5	134662788
cg20080878	Kidney	GRCh37	chr8	126479070
cg07646467	Kidney	GRCh37	chr10	130844899
cg00912247	Kidney	GRCh37	chr14	104889116
cg21291759	Kidney	GRCh37	chr1	18406786
cg03048372	Kidney	GRCh37	chr12	124929991
cg02650121	Kidney	GRCh37	chr7	36124562
cg19640581	Kidney	GRCh37	chr5	501343
cg05738240	Kidney	GRCh37	chr12	114337927
cg08396985	Kidney	GRCh37	chr2	5896489
cg07068768	Kidney	GRCh37	chr22	25595840
cg19126169	Kidney	GRCh37	chr11	71725590
cg00527307	Kidney	GRCh37	chr13	34208894
cg23747646	Kidney	GRCh37	chr6	35248951
cg01743020	Kidney	GRCh37	chr2	1886086
cg12389346	Kidney	GRCh37	chr4	1215112
cg05633407	Kidney	GRCh37	chr17	80654900
cg22648815	Kidney	GRCh37	chr2	113969140
cg23402986	Kidney	GRCh37	chr8	58979272
cg25809561	Kidney	GRCh37	chr17	30822961
cg17141577	Kidney	GRCh37	chr10	12940536
cg24027780	Kidney	GRCh37	chr7	150108191
cg14574910	Kidney	GRCh37	chr5	2155809
cg24970360	Kidney	GRCh37	chr4	184297580
cg20462449	Kidney	GRCh37	chr1	1613704
cg07159758	Kidney	GRCh37	chr17	55474061
cg14095720	Kidney	GRCh37	chr1	201195051
cg21978694	Kidney	GRCh37	chr19	45316509
cg24137774	Kidney	GRCh37	chr11	19372014
cg05760765	Kidney	GRCh37	chr12	125243098
cg07919128	Kidney	GRCh37	chr17	18022025
cg07925867	Kidney	GRCh37	chr16	66953432
cg04587617	Kidney	GRCh37	chr17	37907944
cg27173532	Kidney	GRCh37	chr16	84486903
cg24398933	Kidney	GRCh37	chr1	151492569
cg07591921	Kidney	GRCh37	chr13	84413367
cg19755916	Kidney	GRCh37	chr14	28081779
cg26932693	Kidney	GRCh37	chr17	46152449
cg04332422	Kidney	GRCh37	chr14	81852444
cg26019584	Kidney	GRCh37	chr19	1302689
cg04340430	Kidney	GRCh37	chr2	113967479
cg02381965	Kidney	GRCh37	chr2	3418480
cg27452922	Kidney	GRCh37	chr16	88361648
cg07529658	Kidney	GRCh37	chr21	46845160
cg14221831	Kidney	GRCh37	chr16	66952714
cg10520622	Kidney	GRCh37	chr2	237120313
cg09927251	Kidney	GRCh37	chr2	1886105
cg24908198	Kidney	GRCh37	chr11	128812992
cg15517113	Kidney	GRCh37	chr2	620265
cg07581811	Kidney	GRCh37	chr3	184491461
cg16467015	Kidney	GRCh37	chr18	55816677
cg10605735	Kidney	GRCh37	chr15	49966604
cg09158821	Kidney	GRCh37	chr17	1508609
cg11486359	Kidney	GRCh37	chr17	4489504
cg04817300	Kidney	GRCh37	chr11	128812875
cg01884681	Kidney	GRCh37	chr17	70339149
cg05949331	Kidney	GRCh37	chr8	143666563
cg14765933	Kidney	GRCh37	chr5	1414924
cg13606025	Kidney	GRCh37	chr17	68070495
cg21785832	Kidney	GRCh37	chr2	9533680
cg15322542	Kidney	GRCh37	chr17	39471940
cg10652915	Kidney	GRCh37	chr10	130844860
cg13138089	Kidney	GRCh37	chr2	233251770
cg09941017	Kidney	GRCh37	chr7	157688504
cg00971467	Kidney	GRCh37	chr17	4732568
cg07305723	Kidney	GRCh37	chr20	61459078
cg00904548	Kidney	GRCh37	chr3	49720819
cg09682051	Kidney	GRCh37	chr11	128813008
cg05568054	Kidney	GRCh37	chr14	93533637
cg04879832	Liver	GRCh37	chr16	88717456
cg02454890	Liver	GRCh37	chr15	90544015
cg26537639	Liver	GRCh37	chr16	88717374
cg19664267	Liver	GRCh37	chr6	33245163
cg07703462	Liver	GRCh37	chr7	149487338
cg19388016	Liver	GRCh37	chr19	3435350
cg23693289	Liver	GRCh37	chr8	27183097
cg09856068	Liver	GRCh37	chr5	170878246
cg15468521	Liver	GRCh37	chr10	102883343
cg15543281	Liver	GRCh37	chr6	33245181
cg21105227	Liver	GRCh37	chr19	35633669
cg15032314	Liver	GRCh37	chr19	50096610
cg17216478	Liver	GRCh37	chr1	21616619
cg05657618	Liver	GRCh37	chr2	233792732
cg03125427	Liver	GRCh37	chr16	88717482
cg12137206	Liver	GRCh37	chr10	113943397
cg22392666	Liver	GRCh37	chr19	35634167
cg08177833	Liver	GRCh37	chr16	88717537
cg09418984	Liver	GRCh37	chr19	54369447
cg27297851	Liver	GRCh37	chr19	36389833
cg20441502	Liver	GRCh37	chr19	35633794
cg11772919	Liver	GRCh37	chr6	33245328
cg15605448	Liver	GRCh37	chr19	35634229
cg09977969	Liver	GRCh37	chr19	1503778
cg17733616	Liver	GRCh37	chr17	73083887
cg23471612	Liver	GRCh37	chr12	98897216
cg21222370	Liver	GRCh37	chr9	136023905
cg00925616	Liver	GRCh37	chr1	32410211
cg09025501	Liver	GRCh37	chr16	88717472
cg21667878	Liver	GRCh37	chr11	2160980
cg09276315	Liver	GRCh37	chr19	47614071
cg03787864	Liver	GRCh37	chr16	88717134
cg02395363	Liver	GRCh37	chr1	145395846
cg21333861	Liver	GRCh37	chr6	33244976
cg06679087	Liver	GRCh37	chr10	99473206
cg18675043	Liver	GRCh37	chr10	105453224
cg06665109	Liver	GRCh37	chr19	54369436
cg05009389	Liver	GRCh37	chr15	90208810
cg02579136	Liver	GRCh37	chr11	75917404
cg05859777	Liver	GRCh37	chr11	2161102
cg00054525	Liver	GRCh37	chr16	88717587
cg17410295	Liver	GRCh37	chr12	109729809
cg27098900	Liver	GRCh37	chr6	33245128
cg04499151	Liver	GRCh37	chr7	100231278
cg26703661	Liver	GRCh37	chr15	90208915
cg00630164	Liver	GRCh37	chr1	41250062
cg00177496	Liver	GRCh37	chr3	197283127
cg08843517	Liver	GRCh37	chr16	88717464
cg12191938	Liver	GRCh37	chr10	88730946
cg16415340	Liver	GRCh37	chr11	2160964
cg01749347	Liver	GRCh37	chr7	100230985
cg23511432	Liver	GRCh37	chr5	137610255
cg04739306	Liver	GRCh37	chr7	100230781
cg06105778	Liver	GRCh37	chr5	176830667
cg02702614	Liver	GRCh37	chr3	197282691
cg21306329	Liver	GRCh37	chr17	73083876
cg19670286	Liver	GRCh37	chr5	137610127
cg27373972	Liver	GRCh37	chr6	33244788
cg10246531	Liver	GRCh37	chr16	88717628
cg25252585	Liver	GRCh37	chr19	35633972
cg10037494	Liver	GRCh37	chr11	2161135
cg26517849	Liver	GRCh37	chr11	2161141
cg24046411	Liver	GRCh37	chr16	88717646
cg10047173	Liver	GRCh37	chr12	14996587
cg03605686	Liver	GRCh37	chr7	95025194
cg03228065	Liver	GRCh37	chr16	2276770
cg06131338	Liver	GRCh37	chr12	109639461
cg21641834	Liver	GRCh37	chr6	5068684
cg25778166	Liver	GRCh37	chr1	171059935
cg02094018	Liver	GRCh37	chr17	17485934
cg18422423	Liver	GRCh37	chr3	51576922
cg10371483	Liver	GRCh37	chr16	4152045
cg27638288	Liver	GRCh37	chr11	12071946
cg02396797	Liver	GRCh37	chr6	160500689
cg24390871	Liver	GRCh37	chr12	14996508
cg09824255	Liver	GRCh37	chr5	140014002
cg00011605	Liver	GRCh37	chr16	85193529
cg00881370	Liver	GRCh37	chr19	11348439
cg04228042	Liver	GRCh37	chr12	14996527
cg26614815	Liver	GRCh37	chr12	14996776
cg17069650	Liver	GRCh37	chr7	73663536
cg06604968	Liver	GRCh37	chr16	2522266
cg11153969	Liver	GRCh37	chr1	207277031
cg08905654	Liver	GRCh37	chr12	14996743
cg00253681	Liver	GRCh37	chr12	14996583
cg07940011	Liver	GRCh37	chr6	33874211
cg02021180	Liver	GRCh37	chr3	65996909
cg10356463	Liver	GRCh37	chr3	52811376
cg11959387	Liver	GRCh37	chr19	6721027
cg10846328	Liver	GRCh37	chr2	127818131
cg14083603	Liver	GRCh37	chr20	62366419
cg01371233	Liver	GRCh37	chr16	30456325
cg16619721	Liver	GRCh37	chr3	160942782
cg08148488	Liver	GRCh37	chr3	52812973
cg04195454	Liver	GRCh37	chr4	186734622
cg26453360	Liver	GRCh37	chr11	46741373
cg21092551	Liver	GRCh37	chr15	29993498
cg16423337	Liver	GRCh37	chr3	52828818
cg13214149	Liver	GRCh37	chr6	31740978
cg11180966	Liver	GRCh37	chr11	755608
cg25287257	Small_intestine	GRCh37	chr7	156798258
cg21266502	Small_intestine	GRCh37	chr4	155663225
cg14399863	Small_intestine	GRCh37	chr9	707166
cg06702880	Small_intestine	GRCh37	chr4	155663094
cg03041696	Small_intestine	GRCh37	chr14	21094001
cg12534216	Small_intestine	GRCh37	chr6	30095570
cg15528437	Small_intestine	GRCh37	chr5	134386159
cg24592790	Small_intestine	GRCh37	chr8	27450047
cg08498156	Small_intestine	GRCh37	chr6	30095802
cg13441766	Small_intestine	GRCh37	chr5	134376442
cg02983451	Small_intestine	GRCh37	chr2	10183013
cg02071712	Small_intestine	GRCh37	chr12	104235554
cg17495912	Small_intestine	GRCh37	chr13	37006340
cg01579299	Small_intestine	GRCh37	chr8	27450062
cg22108469	Small_intestine	GRCh37	chr5	174158984
cg14994060	Small_intestine	GRCh37	chr5	134376489
cg08566455	Small_intestine	GRCh37	chr2	130971164
cg01516005	Small_intestine	GRCh37	chr10	122709814
cg06609094	Small_intestine	GRCh37	chr4	175132842
cg16762778	Small_intestine	GRCh37	chr8	27449867
cg22895601	Small_intestine	GRCh37	chr14	21131621
cg18055610	Small_intestine	GRCh37	chr6	30095419
cg02853616	Small_intestine	GRCh37	chr4	94755787
cg00918522	Small_intestine	GRCh37	chr4	175132871
cg07686872	Small_intestine	GRCh37	chr7	156794879
cg26398921	Small_intestine	GRCh37	chr1	221065480
cg02456451	Small_intestine	GRCh37	chr7	156871073
cg08346232	Small_intestine	GRCh37	chr12	104235326
cg03696974	Small_intestine	GRCh37	chr16	29888670
cg21836275	Small_intestine	GRCh37	chr12	104235298
cg24717695	Small_intestine	GRCh37	chr7	156809644
cg05060949	Small_intestine	GRCh37	chr7	156798581
cg02587316	Small_intestine	GRCh37	chr19	37096321
cg09839170	Small_intestine	GRCh37	chr5	134376247
cg07469594	Small_intestine	GRCh37	chr15	64456062
cg26509691	Small_intestine	GRCh37	chr5	134363516
cg18061904	Small_intestine	GRCh37	chr2	158454110
cg25307318	Small_intestine	GRCh37	chr10	123923081
cg25397945	Small_intestine	GRCh37	chr19	37096148
cg01964152	Small_intestine	GRCh37	chr6	30095546
cg21817858	Small_intestine	GRCh37	chr5	141133337
cg14605948	Small_intestine	GRCh37	chr9	98315342
cg20270188	Small_intestine	GRCh37	chr1	156611963
cg06462291	Small_intestine	GRCh37	chr12	104235479
cg07274716	Small_intestine	GRCh37	chr5	134363973
cg23792314	Small_intestine	GRCh37	chr12	25056243
cg08158952	Small_intestine	GRCh37	chr19	57183016
cg08970347	Small_intestine	GRCh37	chr8	27449907
cg05131483	Small_intestine	GRCh37	chr16	23706242
cg18179075	Small_intestine	GRCh37	chr7	129913008
cg07265743	Small_intestine	GRCh37	chr17	59535253
cg12179011	Small_intestine	GRCh37	chr20	22560481
cg08582485	Small_intestine	GRCh37	chr20	22557518
cg26311734	Small_intestine	GRCh37	chr4	94755520
cg08875705	Small_intestine	GRCh37	chr12	6665330
cg09354556	Small_intestine	GRCh37	chr3	47051341
cg27627209	Small_intestine	GRCh37	chr7	129913258
cg21475402	Small_intestine	GRCh37	chr1	156612140
cg16407471	Small_intestine	GRCh37	chr11	43602914
cg00890363	Small_intestine	GRCh37	chr4	13540673
cg03807298	Small_intestine	GRCh37	chr5	174159039
cg15176829	Small_intestine	GRCh37	chr1	246952215
cg04285549	Small_intestine	GRCh37	chr14	21121535
cg10900049	Small_intestine	GRCh37	chr2	8849962
cg25518968	Small_intestine	GRCh37	chr17	48845009
cg19022006	Small_intestine	GRCh37	chr18	61143945
cg11862144	Small_intestine	GRCh37	chr18	61143961
cg14839558	Small_intestine	GRCh37	chr1	1874488
cg03529598	Small_intestine	GRCh37	chr11	1847357
cg12462916	Small_intestine	GRCh37	chr1	220132315
cg14361969	Small_intestine	GRCh37	chr7	100883552
cg01068102	Small_intestine	GRCh37	chr11	65620199
cg15139063	Small_intestine	GRCh37	chr2	106959868
cg11069338	Small_intestine	GRCh37	chr11	130060459
cg06421238	Small_intestine	GRCh37	chr17	5993785
cg05766605	Small_intestine	GRCh37	chr1	19384827
cg12732715	Small_intestine	GRCh37	chr1	148929740
cg10398761	Small_intestine	GRCh37	chr16	89169289
cg01498641	Small_intestine	GRCh37	chr16	85365443
cg12234762	Small_intestine	GRCh37	chr7	1018901
cg23172086	Small_intestine	GRCh37	chr10	98129751
cg21617357	Small_intestine	GRCh37	chr11	20389052
cg12252865	Small_intestine	GRCh37	chr3	13520771
cg11435225	Small_intestine	GRCh37	chr22	32014422
cg13261536	Small_intestine	GRCh37	chr8	144343915
cg00092383	Small_intestine	GRCh37	chr7	157075207
cg11411884	Small_intestine	GRCh37	chr4	1016333
cg24658737	Small_intestine	GRCh37	chr1	220292590
cg20910408	Small_intestine	GRCh37	chr7	44801589
cg07369606	Small_intestine	GRCh37	chr17	80290169
cg02071579	Small_intestine	GRCh37	chr16	88550450
cg25385322	Small_intestine	GRCh37	chr7	100884094
cg10853949	Small_intestine	GRCh37	chr17	80290217
cg10021786	Small_intestine	GRCh37	chr16	46964129
cg23678058	Small_intestine	GRCh37	chr2	60722313
cg22482278	Small_intestine	GRCh37	chr17	80289631
cg16366685	Small_intestine	GRCh37	chr17	80535398
cg01741971	Small_intestine	GRCh37	chr2	121470417
cg04987122	Small_intestine	GRCh37	chr16	2213440
cg23617067	Small_intestine	GRCh37	chr1	220292508

## Sheet: Immune_cells_450k
CpG	Cell_type	Genome_build	Chromosome	Locus
cg05398700	Neutrophil	GRCh37	chr14	102677141
cg03146219	Neutrophil	GRCh37	chr11	71189514
cg10342963	Neutrophil	GRCh37	chr15	99443213
cg11070172	Neutrophil	GRCh37	chr14	23586812
cg25074794	Neutrophil	GRCh37	chr10	45958885
cg23819411	Neutrophil	GRCh37	chr3	182929273
cg03637218	Neutrophil	GRCh37	chr5	115209107
cg13785123	Neutrophil	GRCh37	chr1	8931135
cg17572056	Neutrophil	GRCh37	chr3	195947062
cg14066298	Neutrophil	GRCh37	chr6	30297565
cg02279108	Neutrophil	GRCh37	chr7	156836773
cg00705730	Neutrophil	GRCh37	chr2	106438120
cg25739938	Neutrophil	GRCh37	chr2	9610621
cg15658793	Neutrophil	GRCh37	chr19	3398810
cg16802439	Neutrophil	GRCh37	chr16	88907184
cg00660167	Neutrophil	GRCh37	chr17	80200974
cg18869709	Neutrophil	GRCh37	chr22	43342938
cg18715793	Neutrophil	GRCh37	chr19	4518890
cg04858164	Neutrophil	GRCh37	chr15	57324333
cg20782252	Neutrophil	GRCh37	chr7	2153774
cg13852284	Neutrophil	GRCh37	chr10	77548353
cg18502618	Neutrophil	GRCh37	chr21	46902264
cg01692842	Neutrophil	GRCh37	chr11	134126364
cg26262442	Neutrophil	GRCh37	chr12	10183220
cg19037107	Neutrophil	GRCh37	chr11	134126323
cg23338668	Neutrophil	GRCh37	chr8	74240259
cg11014468	Neutrophil	GRCh37	chr3	53362965
cg08435683	Neutrophil	GRCh37	chr20	4836338
cg13468144	Neutrophil	GRCh37	chr17	4081428
cg17852482	Neutrophil	GRCh37	chr17	80833054
cg06975018	Neutrophil	GRCh37	chr6	131894358
cg05936004	Neutrophil	GRCh37	chr3	130693828
cg21792134	Neutrophil	GRCh37	chr3	121491382
cg07409471	Neutrophil	GRCh37	chr17	80833638
cg19619585	Neutrophil	GRCh37	chr15	101170019
cg09948350	Neutrophil	GRCh37	chr2	70189092
cg01699630	Neutrophil	GRCh37	chr6	131894023
cg02722672	Neutrophil	GRCh37	chr4	2967106
cg09317371	Neutrophil	GRCh37	chr16	57180175
cg14181409	Neutrophil	GRCh37	chr17	9802860
cg27416489	Neutrophil	GRCh37	chr2	149823115
cg04609694	Neutrophil	GRCh37	chr6	44204009
cg11671363	Neutrophil	GRCh37	chr5	148810177
cg12031275	Neutrophil	GRCh37	chr15	101093834
cg05949667	Neutrophil	GRCh37	chr11	134126504
cg22941668	Neutrophil	GRCh37	chr5	148810180
cg06270401	Neutrophil	GRCh37	chr12	4699085
cg06526020	Neutrophil	GRCh37	chr6	34308880
cg07790752	Neutrophil	GRCh37	chr1	147101904
cg18136895	Neutrophil	GRCh37	chr15	74290733
cg09694051	Neutrophil	GRCh37	chr12	27181973
cg00501765	Neutrophil	GRCh37	chr1	172410217
cg14343513	Neutrophil	GRCh37	chr17	78753273
cg07621645	Neutrophil	GRCh37	chr2	144503739
cg10133935	Neutrophil	GRCh37	chr19	1423753
cg24131359	Neutrophil	GRCh37	chr12	69346994
cg18424841	Neutrophil	GRCh37	chr20	61315444
cg25600606	Neutrophil	GRCh37	chr11	33308345
cg21090866	Neutrophil	GRCh37	chr17	475789
cg16815625	Neutrophil	GRCh37	chr8	141229477
cg08704934	Neutrophil	GRCh37	chr3	194826585
cg25006077	Neutrophil	GRCh37	chr3	152176018
cg13610659	Neutrophil	GRCh37	chr12	56622608
cg12547959	Neutrophil	GRCh37	chr5	14326153
cg15010903	Neutrophil	GRCh37	chr17	76850256
cg26992566	Neutrophil	GRCh37	chr16	85814166
cg16149628	Neutrophil	GRCh37	chr11	1792574
cg27466532	Neutrophil	GRCh37	chr11	47471400
cg14249520	Neutrophil	GRCh37	chr11	68530177
cg18520125	Neutrophil	GRCh37	chr13	28903926
cg13729548	Neutrophil	GRCh37	chr14	93405937
cg26775538	Neutrophil	GRCh37	chr19	815090
cg00121045	Neutrophil	GRCh37	chr16	1416053
cg15520845	Neutrophil	GRCh37	chr1	205688760
cg13652008	Neutrophil	GRCh37	chr2	33359356
cg26793227	Neutrophil	GRCh37	chr1	16483658
cg18279004	Neutrophil	GRCh37	chr3	111802305
cg21426759	Neutrophil	GRCh37	chr6	30303126
cg23189692	Neutrophil	GRCh37	chr3	184050393
cg16805291	Neutrophil	GRCh37	chr7	36022575
cg26963146	Neutrophil	GRCh37	chr8	141572044
cg11313468	Neutrophil	GRCh37	chr19	41782183
cg22579028	Neutrophil	GRCh37	chr22	27056901
cg17285931	Neutrophil	GRCh37	chr2	240205408
cg16000989	Neutrophil	GRCh37	chr4	41983716
cg01761758	Neutrophil	GRCh37	chr17	76850277
cg22381196	Neutrophil	GRCh37	chr16	72041376
cg15724534	Neutrophil	GRCh37	chr2	211018363
cg10934870	Neutrophil	GRCh37	chr2	70488000
cg08253808	Neutrophil	GRCh37	chr14	102676957
cg18812353	Neutrophil	GRCh37	chr15	56385430
cg11969813	Neutrophil	GRCh37	chr17	79816559
cg06350097	Neutrophil	GRCh37	chr1	161474970
cg25693317	Neutrophil	GRCh37	chr5	171807791
cg24737761	Neutrophil	GRCh37	chr6	106245659
cg03610527	Neutrophil	GRCh37	chr2	242174889
cg08154963	Neutrophil	GRCh37	chr17	33426885
cg12678686	Neutrophil	GRCh37	chr3	127327369
cg00668519	Neutrophil	GRCh37	chr3	11597941
cg09859659	Neutrophil	GRCh37	chr8	142180109
cg10576280	Natural killer cell	GRCh37	chr10	124133822
cg22876699	Natural killer cell	GRCh37	chr3	46535972
cg01053463	Natural killer cell	GRCh37	chr1	26186087
cg27626141	Natural killer cell	GRCh37	chr8	103876469
cg02349669	Natural killer cell	GRCh37	chr5	115155524
cg17189020	Natural killer cell	GRCh37	chr17	3851391
cg14712058	Natural killer cell	GRCh37	chr19	16988083
cg13292607	Natural killer cell	GRCh37	chr10	126751950
cg05227215	Natural killer cell	GRCh37	chr5	139057496
cg13420366	Natural killer cell	GRCh37	chr1	205276235
cg07808087	Natural killer cell	GRCh37	chr4	15005913
cg13620110	Natural killer cell	GRCh37	chr19	10226628
cg15876825	Natural killer cell	GRCh37	chr3	11651881
cg15690475	Natural killer cell	GRCh37	chr17	44101453
cg25009327	Natural killer cell	GRCh37	chr7	148820504
cg24504954	Natural killer cell	GRCh37	chr3	61237217
cg13707793	Natural killer cell	GRCh37	chr5	139045301
cg10095114	Natural killer cell	GRCh37	chr7	66056659
cg02176148	Natural killer cell	GRCh37	chr7	127669218
cg08306303	Natural killer cell	GRCh37	chr11	119567761
cg02869364	Natural killer cell	GRCh37	chr7	1081709
cg17211761	Natural killer cell	GRCh37	chr17	1096626
cg21333217	Natural killer cell	GRCh37	chr3	129277321
cg08909592	Natural killer cell	GRCh37	chr20	60861650
cg13995453	Natural killer cell	GRCh37	chr12	9759653
cg26648465	Natural killer cell	GRCh37	chr16	85676412
cg07912251	Natural killer cell	GRCh37	chr12	107712194
cg00910503	Natural killer cell	GRCh37	chr17	80393666
cg12416290	Natural killer cell	GRCh37	chr3	137432762
cg15956469	Natural killer cell	GRCh37	chr12	10465272
cg26573274	Natural killer cell	GRCh37	chr13	110386152
cg00106685	Natural killer cell	GRCh37	chr3	52720133
cg03601886	Natural killer cell	GRCh37	chr1	53649218
cg26971042	Natural killer cell	GRCh37	chr15	70387217
cg26175287	Natural killer cell	GRCh37	chr14	95877009
cg15393025	Natural killer cell	GRCh37	chr1	244318867
cg10592926	Natural killer cell	GRCh37	chr6	157876961
cg10817615	Natural killer cell	GRCh37	chr11	45687277
cg14791799	Natural killer cell	GRCh37	chr13	24227716
cg03368758	Natural killer cell	GRCh37	chr4	16900733
cg00769882	Natural killer cell	GRCh37	chr1	161493357
cg16316183	Natural killer cell	GRCh37	chr12	129299465
cg24430034	Natural killer cell	GRCh37	chr13	110386176
cg08876481	Natural killer cell	GRCh37	chr10	858923
cg03747304	Natural killer cell	GRCh37	chr12	124908877
cg19614454	Natural killer cell	GRCh37	chr6	139265575
cg24434019	Natural killer cell	GRCh37	chr2	231991017
cg27287951	Natural killer cell	GRCh37	chr7	961322
cg00829063	Natural killer cell	GRCh37	chr2	8596070
cg14021717	Natural killer cell	GRCh37	chr9	137022403
cg19563355	Natural killer cell	GRCh37	chr15	28419658
cg07576219	Natural killer cell	GRCh37	chr1	55012408
cg06117093	Natural killer cell	GRCh37	chr2	240291657
cg05640322	Natural killer cell	GRCh37	chr1	228285781
cg18247172	Natural killer cell	GRCh37	chr15	91370233
cg03032253	Natural killer cell	GRCh37	chr19	4652450
cg00656410	Natural killer cell	GRCh37	chr1	1157541
cg23060465	Natural killer cell	GRCh37	chr8	141625545
cg16183122	Natural killer cell	GRCh37	chr10	88466389
cg08593141	Natural killer cell	GRCh37	chrY	15866447
cg07259733	Natural killer cell	GRCh37	chr12	25103643
cg20149170	Natural killer cell	GRCh37	chr1	23105148
cg14134128	Natural killer cell	GRCh37	chr17	76774832
cg26616258	Natural killer cell	GRCh37	chr16	358591
cg21828319	Natural killer cell	GRCh37	chr7	73645966
cg24137511	Natural killer cell	GRCh37	chr19	18260330
cg01080424	Natural killer cell	GRCh37	chr7	6520004
cg02154531	Natural killer cell	GRCh37	chrX	71237000
cg04513311	Natural killer cell	GRCh37	chr16	88972865
cg03600687	Natural killer cell	GRCh37	chr2	242499012
cg14715482	Natural killer cell	GRCh37	chr5	10377171
cg18881723	Natural killer cell	GRCh37	chr1	160616870
cg05152764	Natural killer cell	GRCh37	chr22	50883366
cg18304186	Natural killer cell	GRCh37	chr8	103129364
cg25671164	Natural killer cell	GRCh37	chr10	60029361
cg00219303	Natural killer cell	GRCh37	chr22	38146969
cg18479798	Natural killer cell	GRCh37	chr11	64533623
cg04392554	Natural killer cell	GRCh37	chr22	46685472
cg15079934	Natural killer cell	GRCh37	chr11	1892307
cg09494176	Natural killer cell	GRCh37	chr4	3193868
cg21228424	Natural killer cell	GRCh37	chr6	42678314
cg01998345	Natural killer cell	GRCh37	chr7	44612077
cg04205664	Natural killer cell	GRCh37	chr7	139209511
cg27196695	Natural killer cell	GRCh37	chr10	134571377
cg13713155	Natural killer cell	GRCh37	chr4	3522139
cg03419646	Natural killer cell	GRCh37	chr17	47297268
cg13525026	Natural killer cell	GRCh37	chr17	18061071
cg02359506	Natural killer cell	GRCh37	chr4	41270335
cg12011479	Natural killer cell	GRCh37	chr19	51873045
cg22897715	Natural killer cell	GRCh37	chr11	57192251
cg19915997	Natural killer cell	GRCh37	chr3	15492725
cg08821715	Natural killer cell	GRCh37	chr10	46991996
cg20699157	Natural killer cell	GRCh37	chr13	24528151
cg03543448	Natural killer cell	GRCh37	chr16	4384967
cg26101890	Natural killer cell	GRCh37	chr2	228185396
cg02935272	Natural killer cell	GRCh37	chr18	3067385
cg09001549	Natural killer cell	GRCh37	chr12	129281454
cg01263407	Natural killer cell	GRCh37	chr10	8138058
cg10506618	Natural killer cell	GRCh37	chr3	42246902
cg18740289	Natural killer cell	GRCh37	chr6	2437142
cg00464927	B-cell	GRCh37	chr11	68139121
cg13738327	B-cell	GRCh37	chr11	68139233
cg04838847	B-cell	GRCh37	chr8	110587155
cg02212339	B-cell	GRCh37	chr17	3493666
cg26318872	B-cell	GRCh37	chr14	104158729
cg21743182	B-cell	GRCh37	chr7	90339132
cg08905753	B-cell	GRCh37	chr6	32783347
cg19260718	B-cell	GRCh37	chr11	75989014
cg12976793	B-cell	GRCh37	chr12	96584672
cg16085171	B-cell	GRCh37	chr12	123569118
cg06889975	B-cell	GRCh37	chr8	22558722
cg22281206	B-cell	GRCh37	chr22	31522176
cg03337918	B-cell	GRCh37	chr8	96148290
cg11020333	B-cell	GRCh37	chr7	2861855
cg11774624	B-cell	GRCh37	chr8	41480639
cg08961187	B-cell	GRCh37	chr6	37648275
cg01868869	B-cell	GRCh37	chr14	50866735
cg05579731	B-cell	GRCh37	chr11	61648132
cg10147394	B-cell	GRCh37	chr8	11350297
cg07145038	B-cell	GRCh37	chr5	55374514
cg02582213	B-cell	GRCh37	chr16	89441654
cg08163918	B-cell	GRCh37	chr12	57628654
cg15287850	B-cell	GRCh37	chr3	186739599
cg02393092	B-cell	GRCh37	chr9	131444897
cg15242630	B-cell	GRCh37	chr22	18488478
cg17622855	B-cell	GRCh37	chr6	157982358
cg13823257	B-cell	GRCh37	chr9	35666823
cg03402235	B-cell	GRCh37	chr15	42749336
cg21248060	B-cell	GRCh37	chr7	1039957
cg19766988	B-cell	GRCh37	chr19	10231711
cg24091162	B-cell	GRCh37	chr17	62010456
cg13915752	B-cell	GRCh37	chr6	111132613
cg16396223	B-cell	GRCh37	chr7	151422150
cg26284388	B-cell	GRCh37	chr10	126289835
cg11699517	B-cell	GRCh37	chr17	79419796
cg10278046	B-cell	GRCh37	chr16	4802848
cg23730277	B-cell	GRCh37	chr4	102734752
cg21494075	B-cell	GRCh37	chr11	129817717
cg10854528	B-cell	GRCh37	chr2	54855934
cg17774764	B-cell	GRCh37	chr19	50921551
cg26946905	B-cell	GRCh37	chr16	89441595
cg14508705	B-cell	GRCh37	chr1	172360182
cg11375112	B-cell	GRCh37	chr12	11883006
cg07877964	B-cell	GRCh37	chr16	9023363
cg07262620	B-cell	GRCh37	chr2	47982632
cg04103645	B-cell	GRCh37	chr13	51898948
cg24777505	B-cell	GRCh37	chr17	80829604
cg14317609	B-cell	GRCh37	chr9	36986006
cg02051688	B-cell	GRCh37	chr11	111568985
cg04289069	B-cell	GRCh37	chr10	14968808
cg16325984	B-cell	GRCh37	chr2	240291068
cg10548805	B-cell	GRCh37	chr14	101538070
cg04499011	B-cell	GRCh37	chr6	36972127
cg12604490	B-cell	GRCh37	chr6	99373813
cg26692003	B-cell	GRCh37	chr3	13063165
cg02027263	B-cell	GRCh37	chr5	175664224
cg16698623	B-cell	GRCh37	chr10	131412968
cg13103051	B-cell	GRCh37	chr18	44260790
cg19610383	B-cell	GRCh37	chr8	26485445
cg26826183	B-cell	GRCh37	chr19	10231701
cg03248292	B-cell	GRCh37	chr12	92861062
cg23275914	B-cell	GRCh37	chr1	1114914
cg23001905	B-cell	GRCh37	chr19	1265302
cg26574610	B-cell	GRCh37	chr22	24095989
cg02053451	B-cell	GRCh37	chr2	47922605
cg08875297	B-cell	GRCh37	chr12	56127068
cg07652788	B-cell	GRCh37	chr10	133598589
cg16706613	B-cell	GRCh37	chr12	52423671
cg18495884	B-cell	GRCh37	chr7	2020099
cg03324175	B-cell	GRCh37	chr11	61124464
cg21118486	B-cell	GRCh37	chr6	167263225
cg19931733	B-cell	GRCh37	chr2	30382574
cg08864105	B-cell	GRCh37	chr1	111743020
cg11051295	B-cell	GRCh37	chr4	185876283
cg04576021	B-cell	GRCh37	chr6	32784255
cg14283140	B-cell	GRCh37	chr9	135763667
cg25236277	B-cell	GRCh37	chr3	119070599
cg16851385	B-cell	GRCh37	chr2	38760707
cg27058221	B-cell	GRCh37	chr16	14766421
cg27627493	B-cell	GRCh37	chr15	63767360
cg02630207	B-cell	GRCh37	chr2	45839653
cg27224881	B-cell	GRCh37	chr15	33191698
cg23344706	B-cell	GRCh37	chr3	172593877
cg16194437	B-cell	GRCh37	chr7	94185174
cg06083001	B-cell	GRCh37	chr1	41478189
cg07912723	B-cell	GRCh37	chr1	2032058
cg08678755	B-cell	GRCh37	chr6	131957011
cg10824972	B-cell	GRCh37	chr6	11429244
cg00682125	B-cell	GRCh37	chr6	20999098
cg10443971	B-cell	GRCh37	chr11	47287606
cg16586807	B-cell	GRCh37	chr7	2948081
cg07337602	B-cell	GRCh37	chr3	186714361
cg07435215	B-cell	GRCh37	chr15	41575421
cg24045212	B-cell	GRCh37	chr7	2020131
cg13761364	B-cell	GRCh37	chr9	140325278
cg06522833	B-cell	GRCh37	chr4	140236594
cg01093028	B-cell	GRCh37	chr12	89749080
cg27253454	B-cell	GRCh37	chr17	9603340
cg06452129	B-cell	GRCh37	chr16	85265566
cg19024599	B-cell	GRCh37	chr2	109886730
cg14477767	CD4+ T-cell	GRCh37	chr4	170195438
cg13745692	CD4+ T-cell	GRCh37	chr3	60065489
cg12047375	CD4+ T-cell	GRCh37	chr8	54757132
cg01154505	CD4+ T-cell	GRCh37	chr2	112940409
cg10837404	CD4+ T-cell	GRCh37	chr5	112356289
cg26852894	CD4+ T-cell	GRCh37	chr4	11157341
cg00208274	CD4+ T-cell	GRCh37	chr7	4779342
cg14588003	CD4+ T-cell	GRCh37	chr15	93361889
cg19001909	CD4+ T-cell	GRCh37	chr17	26205940
cg05931551	CD4+ T-cell	GRCh37	chr1	52892210
cg11710595	CD4+ T-cell	GRCh37	chr2	15260455
cg16921643	CD4+ T-cell	GRCh37	chr8	135513489
cg16375820	CD4+ T-cell	GRCh37	chr5	55289001
cg07679948	CD4+ T-cell	GRCh37	chr12	56329641
cg11307417	CD4+ T-cell	GRCh37	chr3	48310616
cg08486432	CD4+ T-cell	GRCh37	chr6	33598003
cg05617307	CD4+ T-cell	GRCh37	chr10	121413182
cg20737812	CD4+ T-cell	GRCh37	chr15	86336631
cg15163862	CD4+ T-cell	GRCh37	chr10	76721440
cg05290737	CD4+ T-cell	GRCh37	chr12	123215151
cg14408428	CD4+ T-cell	GRCh37	chr9	129593182
cg08916477	CD4+ T-cell	GRCh37	chr16	30391350
cg00330518	CD4+ T-cell	GRCh37	chr1	2228160
cg26600461	CD4+ T-cell	GRCh37	chr16	89101757
cg07133479	CD4+ T-cell	GRCh37	chr2	86420600
cg24008435	CD4+ T-cell	GRCh37	chr15	101137976
cg09722826	CD4+ T-cell	GRCh37	chr16	50780248
cg05070273	CD4+ T-cell	GRCh37	chr3	48310897
cg06329392	CD4+ T-cell	GRCh37	chr13	40762435
cg00356916	CD4+ T-cell	GRCh37	chr1	116256618
cg06739462	CD4+ T-cell	GRCh37	chr12	56329296
cg15667493	CD4+ T-cell	GRCh37	chr5	55404179
cg01525879	CD4+ T-cell	GRCh37	chr11	67207498
cg17824906	CD4+ T-cell	GRCh37	chr12	1700011
cg18835815	CD4+ T-cell	GRCh37	chr8	54757048
cg21410980	CD4+ T-cell	GRCh37	chr4	40121831
cg21268578	CD4+ T-cell	GRCh37	chr22	38029478
cg07110949	CD4+ T-cell	GRCh37	chr4	1309878
cg00366435	CD4+ T-cell	GRCh37	chr12	6896105
cg01458495	CD4+ T-cell	GRCh37	chr3	48310544
cg03019000	CD4+ T-cell	GRCh37	chr3	51704351
cg18470780	CD4+ T-cell	GRCh37	chr14	59064969
cg18384277	CD4+ T-cell	GRCh37	chr6	31550842
cg23691894	CD4+ T-cell	GRCh37	chr10	111765904
cg14085952	CD4+ T-cell	GRCh37	chr9	139496844
cg02923224	CD4+ T-cell	GRCh37	chr3	60133085
cg27225130	CD4+ T-cell	GRCh37	chr1	208218009
cg12219469	CD4+ T-cell	GRCh37	chr10	5936426
cg02669193	CD4+ T-cell	GRCh37	chr6	167173257
cg21200667	CD4+ T-cell	GRCh37	chr2	30628085
cg12051710	CD4+ T-cell	GRCh37	chr12	2989070
cg07229767	CD4+ T-cell	GRCh37	chr4	3372206
cg00048381	CD4+ T-cell	GRCh37	chr1	154587507
cg14564351	CD4+ T-cell	GRCh37	chr6	135644405
cg23977888	CD4+ T-cell	GRCh37	chr5	55994653
cg24729879	CD4+ T-cell	GRCh37	chr5	55288892
cg07930752	CD4+ T-cell	GRCh37	chr2	204569955
cg04244970	CD4+ T-cell	GRCh37	chr1	160708987
cg27423838	CD4+ T-cell	GRCh37	chr3	39388759
cg14006800	CD4+ T-cell	GRCh37	chr4	11652483
cg02072492	CD4+ T-cell	GRCh37	chr5	95063827
cg01790464	CD4+ T-cell	GRCh37	chr14	23623935
cg25189608	CD4+ T-cell	GRCh37	chr11	96117844
cg00678668	CD4+ T-cell	GRCh37	chr14	55221389
cg09999348	CD4+ T-cell	GRCh37	chr2	46398848
cg07837085	CD4+ T-cell	GRCh37	chr1	160708990
cg21565496	CD4+ T-cell	GRCh37	chr13	40762150
cg13695076	CD4+ T-cell	GRCh37	chr14	61225294
cg11465943	CD4+ T-cell	GRCh37	chr11	60833378
cg21609087	CD4+ T-cell	GRCh37	chr3	112739297
cg19235307	CD4+ T-cell	GRCh37	chr3	129160154
cg23971987	CD4+ T-cell	GRCh37	chr4	11652505
cg10414350	CD4+ T-cell	GRCh37	chr8	10210282
cg00801571	CD4+ T-cell	GRCh37	chr6	112033832
cg01874152	CD4+ T-cell	GRCh37	chr12	55375859
cg27190014	CD4+ T-cell	GRCh37	chr8	128971471
cg04573845	CD4+ T-cell	GRCh37	chr6	14785321
cg01364581	CD4+ T-cell	GRCh37	chr7	150175800
cg06828613	CD4+ T-cell	GRCh37	chr1	209859738
cg23199907	CD4+ T-cell	GRCh37	chr13	33305966
cg15137213	CD4+ T-cell	GRCh37	chr17	585596
cg11887733	CD4+ T-cell	GRCh37	chr3	71648377
cg18303397	CD4+ T-cell	GRCh37	chr3	129160135
cg19408207	CD4+ T-cell	GRCh37	chr3	178755197
cg11667400	CD4+ T-cell	GRCh37	chr13	99963609
cg18055007	CD4+ T-cell	GRCh37	chr6	31698226
cg05262463	CD4+ T-cell	GRCh37	chr19	50056081
cg07643762	CD4+ T-cell	GRCh37	chr4	75174080
cg25558027	CD4+ T-cell	GRCh37	chr17	9930194
cg19507256	CD4+ T-cell	GRCh37	chr7	149552478
cg09119854	CD4+ T-cell	GRCh37	chr17	63550766
cg26986871	CD4+ T-cell	GRCh37	chr12	10545083
cg27185510	CD4+ T-cell	GRCh37	chr7	95811907
cg00445959	CD4+ T-cell	GRCh37	chr16	28220268
cg26166854	CD4+ T-cell	GRCh37	chr6	6614447
cg21358380	CD4+ T-cell	GRCh37	chr2	70353785
cg25599673	CD4+ T-cell	GRCh37	chr3	186738370
cg06809364	CD4+ T-cell	GRCh37	chr3	152555206
cg19573580	CD4+ T-cell	GRCh37	chr6	30706717
cg13500113	CD4+ T-cell	GRCh37	chr2	216947149
cg00219921	CD8+ T-cell	GRCh37	chr2	87012810
cg04329870	CD8+ T-cell	GRCh37	chr2	87048747
cg11067179	CD8+ T-cell	GRCh37	chr11	66083541
cg18174654	CD8+ T-cell	GRCh37	chr2	87019612
cg03318654	CD8+ T-cell	GRCh37	chr2	87034200
cg20367218	CD8+ T-cell	GRCh37	chr11	66083224
cg16810279	CD8+ T-cell	GRCh37	chr17	76254129
cg13543915	CD8+ T-cell	GRCh37	chr9	134293793
cg09654116	CD8+ T-cell	GRCh37	chr7	158816213
cg16235995	CD8+ T-cell	GRCh37	chr14	32797149
cg06419846	CD8+ T-cell	GRCh37	chr11	66083697
cg18857618	CD8+ T-cell	GRCh37	chr2	87048489
cg07016730	CD8+ T-cell	GRCh37	chr22	50912306
cg07702659	CD8+ T-cell	GRCh37	chr1	228324020
cg21091766	CD8+ T-cell	GRCh37	chr5	176898673
cg26173847	CD8+ T-cell	GRCh37	chr7	127671017
cg16681873	CD8+ T-cell	GRCh37	chr19	1090978
cg21648425	CD8+ T-cell	GRCh37	chr2	87019192
cg04658357	CD8+ T-cell	GRCh37	chr17	18911043
cg24345747	CD8+ T-cell	GRCh37	chr2	87015813
cg09385972	CD8+ T-cell	GRCh37	chr16	772568
cg01949403	CD8+ T-cell	GRCh37	chr22	36562402
cg07707056	CD8+ T-cell	GRCh37	chr22	36562416
cg14027234	CD8+ T-cell	GRCh37	chr11	66084163
cg27445883	CD8+ T-cell	GRCh37	chr2	87089933
cg25535316	CD8+ T-cell	GRCh37	chr11	579198
cg18546384	CD8+ T-cell	GRCh37	chr7	2077057
cg24235581	CD8+ T-cell	GRCh37	chr12	58290452
cg17851021	CD8+ T-cell	GRCh37	chr5	1097374
cg23325335	CD8+ T-cell	GRCh37	chr15	99979290
cg12104246	CD8+ T-cell	GRCh37	chr6	24718589
cg20243351	CD8+ T-cell	GRCh37	chr17	47271156
cg15555970	CD8+ T-cell	GRCh37	chr18	3452317
cg22620363	CD8+ T-cell	GRCh37	chr10	80826794
cg26176018	CD8+ T-cell	GRCh37	chr2	30478251
cg03686455	CD8+ T-cell	GRCh37	chr7	2076998
cg15201417	CD8+ T-cell	GRCh37	chr11	66034922
cg21347444	CD8+ T-cell	GRCh37	chr2	107107664
cg12621203	CD8+ T-cell	GRCh37	chr1	23750509
cg02305850	CD8+ T-cell	GRCh37	chr11	126152462
cg14171188	CD8+ T-cell	GRCh37	chr1	244218327
cg03984502	CD8+ T-cell	GRCh37	chr1	151805661
cg26660631	CD8+ T-cell	GRCh37	chr1	47015494
cg05478809	CD8+ T-cell	GRCh37	chr11	66082889
cg01474925	CD8+ T-cell	GRCh37	chr6	166824871
cg03771580	CD8+ T-cell	GRCh37	chr11	59190192
cg12150039	CD8+ T-cell	GRCh37	chr19	35490532
cg18224038	CD8+ T-cell	GRCh37	chr2	87042671
cg04683740	CD8+ T-cell	GRCh37	chr2	30462126
cg05496363	CD8+ T-cell	GRCh37	chr11	66083766
cg25618573	CD8+ T-cell	GRCh37	chr11	66034896
cg05039671	CD8+ T-cell	GRCh37	chr4	40245120
cg20697519	CD8+ T-cell	GRCh37	chr1	159795262
cg02021288	CD8+ T-cell	GRCh37	chr16	11435867
cg23628949	CD8+ T-cell	GRCh37	chr15	77286948
cg16819028	CD8+ T-cell	GRCh37	chr1	201251982
cg13721589	CD8+ T-cell	GRCh37	chr17	17716006
cg00706302	CD8+ T-cell	GRCh37	chr2	113832957
cg19594892	CD8+ T-cell	GRCh37	chr1	37984690
cg17839611	CD8+ T-cell	GRCh37	chr17	47286802
cg10649706	CD8+ T-cell	GRCh37	chr8	141636798
cg14384158	CD8+ T-cell	GRCh37	chr9	140348828
cg22556056	CD8+ T-cell	GRCh37	chr17	2228003
cg00702872	CD8+ T-cell	GRCh37	chr6	3524580
cg04274340	CD8+ T-cell	GRCh37	chr19	41271256
cg04628014	CD8+ T-cell	GRCh37	chr7	158816392
cg24691069	CD8+ T-cell	GRCh37	chr6	37322773
cg05041073	CD8+ T-cell	GRCh37	chr17	37774893
cg19433807	CD8+ T-cell	GRCh37	chr15	41058059
cg20383347	CD8+ T-cell	GRCh37	chr7	98586433
cg27276522	CD8+ T-cell	GRCh37	chr12	68049525
cg24019564	CD8+ T-cell	GRCh37	chr1	25257566
cg12043508	CD8+ T-cell	GRCh37	chr2	87059202
cg25235205	CD8+ T-cell	GRCh37	chr7	98970792
cg23883802	CD8+ T-cell	GRCh37	chr17	42290419
cg11536586	CD8+ T-cell	GRCh37	chr7	4770167
cg00567930	CD8+ T-cell	GRCh37	chr1	2250796
cg23851932	CD8+ T-cell	GRCh37	chr11	64627633
cg05520031	CD8+ T-cell	GRCh37	chr9	129262012
cg16308841	CD8+ T-cell	GRCh37	chr2	101886706
cg09025210	CD8+ T-cell	GRCh37	chr3	141132146
cg01847441	CD8+ T-cell	GRCh37	chr14	69431073
cg03248158	CD8+ T-cell	GRCh37	chr4	122632918
cg05768702	CD8+ T-cell	GRCh37	chr17	47271133
cg12128589	CD8+ T-cell	GRCh37	chr11	67202122
cg12829325	CD8+ T-cell	GRCh37	chr21	34638188
cg12477370	CD8+ T-cell	GRCh37	chr6	45391852
cg24684520	CD8+ T-cell	GRCh37	chr10	120543329
cg22182666	CD8+ T-cell	GRCh37	chr17	56405155
cg25554283	CD8+ T-cell	GRCh37	chr17	63558259
cg26748758	CD8+ T-cell	GRCh37	chr11	77792715
cg21686890	CD8+ T-cell	GRCh37	chr22	35773089
cg02678305	CD8+ T-cell	GRCh37	chr6	30460322
cg06352730	CD8+ T-cell	GRCh37	chr7	47621692
cg08035195	CD8+ T-cell	GRCh37	chr2	161262014
cg10716612	CD8+ T-cell	GRCh37	chr4	184113429
cg14140874	CD8+ T-cell	GRCh37	chr11	75277124
cg16613029	CD8+ T-cell	GRCh37	chr16	9052762
cg08521187	CD8+ T-cell	GRCh37	chr2	7570948
cg04608004	CD8+ T-cell	GRCh37	chr1	9781268
cg18066690	Monocyte	GRCh37	chr8	48344060
cg10480329	Monocyte	GRCh37	chr2	27011850
cg10624395	Monocyte	GRCh37	chr11	110350574
cg23391288	Monocyte	GRCh37	chr13	49366203
cg22675702	Monocyte	GRCh37	chr17	20026062
cg02244028	Monocyte	GRCh37	chr3	38992200
cg04468741	Monocyte	GRCh37	chr11	12181467
cg08908131	Monocyte	GRCh37	chr10	118706938
cg16636767	Monocyte	GRCh37	chr11	13694647
cg19301114	Monocyte	GRCh37	chr6	161796785
cg18770149	Monocyte	GRCh37	chr1	149903180
cg23244761	Monocyte	GRCh37	chr6	161796850
cg13290254	Monocyte	GRCh37	chr12	125197730
cg03567939	Monocyte	GRCh37	chr7	151506147
cg06297318	Monocyte	GRCh37	chr6	127667691
cg04045544	Monocyte	GRCh37	chr16	27298091
cg03533256	Monocyte	GRCh37	chr17	72620088
cg27366072	Monocyte	GRCh37	chr12	12222913
cg19015847	Monocyte	GRCh37	chr2	40447561
cg26953469	Monocyte	GRCh37	chr10	31872296
cg07002540	Monocyte	GRCh37	chr2	85281128
cg04851465	Monocyte	GRCh37	chr1	212408609
cg02780988	Monocyte	GRCh37	chr17	39646994
cg25765315	Monocyte	GRCh37	chr12	92472232
cg10967114	Monocyte	GRCh37	chr5	150442668
cg05242065	Monocyte	GRCh37	chr2	85060011
cg00328720	Monocyte	GRCh37	chr8	28562890
cg14109551	Monocyte	GRCh37	chr6	118903047
cg13313836	Monocyte	GRCh37	chr15	60687284
cg27549186	Monocyte	GRCh37	chr17	76858248
cg16356013	Monocyte	GRCh37	chr5	134722079
cg09923954	Monocyte	GRCh37	chr10	65460017
cg24365417	Monocyte	GRCh37	chr2	178939184
cg04478930	Monocyte	GRCh37	chr3	71927912
cg26673980	Monocyte	GRCh37	chr7	151493820
cg05452742	Monocyte	GRCh37	chr11	34070756
cg01024962	Monocyte	GRCh37	chr14	31389792
cg23643542	Monocyte	GRCh37	chr4	150983649
cg26124526	Monocyte	GRCh37	chr5	60618932
cg11664417	Monocyte	GRCh37	chr5	71883710
cg22434923	Monocyte	GRCh37	chr21	46289921
cg00646216	Monocyte	GRCh37	chr16	73210822
cg25517015	Monocyte	GRCh37	chr19	17584020
cg14043316	Monocyte	GRCh37	chr22	50743420
cg01476222	Monocyte	GRCh37	chr11	36522143
cg22056336	Monocyte	GRCh37	chr4	40444001
cg08694574	Monocyte	GRCh37	chr16	86011615
cg03842822	Monocyte	GRCh37	chr5	177740106
cg21503701	Monocyte	GRCh37	chr3	53781065
cg22388417	Monocyte	GRCh37	chr8	134657812
cg04764839	Monocyte	GRCh37	chr10	18708076
cg26338202	Monocyte	GRCh37	chr6	163768326
cg21385052	Monocyte	GRCh37	chr1	149903249
cg11029367	Monocyte	GRCh37	chr3	124705145
cg06601993	Monocyte	GRCh37	chr7	80244500
cg19463078	Monocyte	GRCh37	chr4	122099598
cg16728323	Monocyte	GRCh37	chr13	111212174
cg18589858	Monocyte	GRCh37	chr11	74860985
cg25376491	Monocyte	GRCh37	chr5	179192524
cg18683606	Monocyte	GRCh37	chr7	100471612
cg02481950	Monocyte	GRCh37	chr16	21665002
cg20641531	Monocyte	GRCh37	chr7	8302731
cg21764708	Monocyte	GRCh37	chr7	151493629
cg17787876	Monocyte	GRCh37	chr1	156467057
cg06449934	Monocyte	GRCh37	chr7	1130697
cg00177203	Monocyte	GRCh37	chr1	149901142
cg13856674	Monocyte	GRCh37	chr15	93722590
cg00101629	Monocyte	GRCh37	chr1	15068966
cg13223209	Monocyte	GRCh37	chr10	16986391
cg01797381	Monocyte	GRCh37	chr3	57128136
cg19380581	Monocyte	GRCh37	chr18	43611957
cg07457727	Monocyte	GRCh37	chr8	131451983
cg15872437	Monocyte	GRCh37	chr3	37804282
cg20212077	Monocyte	GRCh37	chr13	68194226
cg02497428	Monocyte	GRCh37	chr16	21665138
cg26538782	Monocyte	GRCh37	chr19	10308540
cg24861866	Monocyte	GRCh37	chr10	135106684
cg07099567	Monocyte	GRCh37	chr14	81780369
cg09366519	Monocyte	GRCh37	chr1	209877970
cg15633603	Monocyte	GRCh37	chr2	190399258
cg12893373	Monocyte	GRCh37	chr3	97677056
cg27081745	Monocyte	GRCh37	chr5	67627382
cg15395971	Monocyte	GRCh37	chr1	95010070
cg11051139	Monocyte	GRCh37	chr12	52580428
cg12873119	Monocyte	GRCh37	chr20	23067771
cg16875057	Monocyte	GRCh37	chr2	169006003
cg10732094	Monocyte	GRCh37	chr19	45957466
cg20433382	Monocyte	GRCh37	chr6	125331312
cg12422199	Monocyte	GRCh37	chr3	101284166
cg22312249	Monocyte	GRCh37	chr17	72779428
cg17907003	Monocyte	GRCh37	chr1	117533414
cg04710661	Monocyte	GRCh37	chrX	2848381
cg09322573	Monocyte	GRCh37	chr8	28961356
cg26326621	Monocyte	GRCh37	chr14	77332983
cg25291653	Monocyte	GRCh37	chr20	19867145
cg20867674	Monocyte	GRCh37	chr6	163768411
cg05654103	Monocyte	GRCh37	chr2	24586381
cg20076126	Monocyte	GRCh37	chr14	69784107
cg00448868	Monocyte	GRCh37	chr16	66775493
cg22694983	Monocyte	GRCh37	chr3	177514999

## Sheet: Immune_cells_850k
CpG	Cell_type	Genome_build	Chromosome	Locus
cg10727316	B-cell	GRCh37	chr17	65431313
cg02212339	B-cell	GRCh37	chr17	3493666
cg00464927	B-cell	GRCh37	chr11	68139121
cg11773391	B-cell	GRCh37	chr2	152628341
cg17768768	B-cell	GRCh37	chr7	2948123
cg25131632	B-cell	GRCh37	chr10	94549040
cg04985318	B-cell	GRCh37	chr11	66379132
cg11699517	B-cell	GRCh37	chr17	79419796
cg05062263	B-cell	GRCh37	chr8	9577928
cg19276014	B-cell	GRCh37	chr10	133598638
cg23370196	B-cell	GRCh37	chr2	152628395
cg05005728	B-cell	GRCh37	chr3	16413085
cg15021006	B-cell	GRCh37	chr8	101446861
cg08017518	B-cell	GRCh37	chr4	2698377
cg14337149	B-cell	GRCh37	chr22	18077489
cg18438462	B-cell	GRCh37	chr6	116486884
cg06993524	B-cell	GRCh37	chr20	16373293
cg04100392	B-cell	GRCh37	chr17	65809667
cg25792138	B-cell	GRCh37	chr10	61636177
cg15139660	B-cell	GRCh37	chr9	37337906
cg26692003	B-cell	GRCh37	chr3	13063165
cg13738327	B-cell	GRCh37	chr11	68139233
cg11774624	B-cell	GRCh37	chr8	41480639
cg10196258	B-cell	GRCh37	chr8	95991427
cg20943999	B-cell	GRCh37	chr11	85453669
cg24547614	B-cell	GRCh37	chr1	174103154
cg03656086	B-cell	GRCh37	chr3	170085847
cg08078218	B-cell	GRCh37	chr15	40846211
cg03377878	B-cell	GRCh37	chr3	13062585
cg17527683	B-cell	GRCh37	chr12	132251044
cg08888322	B-cell	GRCh37	chr21	34668629
cg16905438	B-cell	GRCh37	chr1	155930426
cg27106643	B-cell	GRCh37	chr18	77257352
cg03168886	B-cell	GRCh37	chr8	22387548
cg00809787	B-cell	GRCh37	chr2	8793790
cg11217679	B-cell	GRCh37	chr8	81070832
cg03404796	B-cell	GRCh37	chr13	31017465
cg14936008	B-cell	GRCh37	chr14	107260014
cg11661493	B-cell	GRCh37	chr17	74423978
cg14690711	B-cell	GRCh37	chr12	132255517
cg13420642	B-cell	GRCh37	chr2	7192675
cg09794722	B-cell	GRCh37	chr22	33916175
cg14674722	B-cell	GRCh37	chr16	75041555
cg16187328	B-cell	GRCh37	chr9	140639428
cg20602300	B-cell	GRCh37	chr15	40846077
cg20572186	B-cell	GRCh37	chr2	235007538
cg23683962	B-cell	GRCh37	chr3	24549503
cg17575365	B-cell	GRCh37	chr7	90339136
cg15819435	B-cell	GRCh37	chr3	15387432
cg21596498	B-cell	GRCh37	chr19	42618407
cg12092786	B-cell	GRCh37	chr22	42332408
cg10217454	B-cell	GRCh37	chr6	218489
cg23005541	B-cell	GRCh37	chr2	211325159
cg21248060	B-cell	GRCh37	chr7	1039957
cg11363726	B-cell	GRCh37	chr3	16475415
cg07558704	B-cell	GRCh37	chr2	73286489
cg01312999	B-cell	GRCh37	chr5	131730715
cg01581561	B-cell	GRCh37	chr4	10152845
cg03635646	B-cell	GRCh37	chr3	123329317
cg27646937	B-cell	GRCh37	chr16	10688645
cg25409889	B-cell	GRCh37	chr9	130749797
cg01179423	B-cell	GRCh37	chr14	71825149
cg13823257	B-cell	GRCh37	chr9	35666823
cg09422942	B-cell	GRCh37	chr1	203722630
cg09388301	B-cell	GRCh37	chr8	101914671
cg18694540	B-cell	GRCh37	chr5	159859433
cg16396540	B-cell	GRCh37	chr12	122889790
cg20856761	B-cell	GRCh37	chr7	76911208
cg02597143	B-cell	GRCh37	chr14	65787786
cg08657729	B-cell	GRCh37	chr22	36146067
cg08247449	B-cell	GRCh37	chr1	226558897
cg17846116	B-cell	GRCh37	chr1	245104575
cg08156015	B-cell	GRCh37	chr7	139408541
cg25683989	B-cell	GRCh37	chr12	111124215
cg00762029	B-cell	GRCh37	chr4	185317438
cg22317237	B-cell	GRCh37	chr1	15898315
cg14060402	B-cell	GRCh37	chr9	37141146
cg09723773	B-cell	GRCh37	chr12	132541108
cg00285174	B-cell	GRCh37	chr5	132368863
cg18664915	B-cell	GRCh37	chr7	1043861
cg18102099	B-cell	GRCh37	chr16	71727329
cg04686571	B-cell	GRCh37	chr1	8591268
cg12497181	B-cell	GRCh37	chr3	36933055
cg01591579	B-cell	GRCh37	chr2	234111145
cg21604944	B-cell	GRCh37	chr12	31756929
cg01165928	B-cell	GRCh37	chr7	102082517
cg20340870	B-cell	GRCh37	chr4	87919459
cg04838847	B-cell	GRCh37	chr8	110587155
cg23105068	B-cell	GRCh37	chr3	128996993
cg16148346	B-cell	GRCh37	chr11	58826475
cg07232049	B-cell	GRCh37	chr1	231093497
cg26552743	B-cell	GRCh37	chr11	58826414
cg10196751	B-cell	GRCh37	chr1	175186983
cg10016973	B-cell	GRCh37	chr6	53794529
cg22385175	B-cell	GRCh37	chr1	14998644
cg25003656	B-cell	GRCh37	chr11	111253360
cg05480110	B-cell	GRCh37	chr3	195534854
cg26318872	B-cell	GRCh37	chr14	104158729
cg07945971	B-cell	GRCh37	chr12	3287331
cg16085171	B-cell	GRCh37	chr12	123569118
cg09131321	CD4+ T-cell	GRCh37	chr12	10545471
cg13121392	CD4+ T-cell	GRCh37	chr1	43401136
cg26986871	CD4+ T-cell	GRCh37	chr12	10545083
cg24460976	CD4+ T-cell	GRCh37	chr19	13292854
cg26174351	CD4+ T-cell	GRCh37	chr17	47481071
cg09257735	CD4+ T-cell	GRCh37	chr14	93581049
cg09049392	CD4+ T-cell	GRCh37	chr2	12197871
cg24048497	CD4+ T-cell	GRCh37	chr6	14866284
cg19933595	CD4+ T-cell	GRCh37	chr4	146857013
cg27027151	CD4+ T-cell	GRCh37	chr16	27461638
cg07215281	CD4+ T-cell	GRCh37	chr1	234544834
cg02576719	CD4+ T-cell	GRCh37	chr1	234544671
cg14477767	CD4+ T-cell	GRCh37	chr4	170195438
cg00952857	CD4+ T-cell	GRCh37	chr1	234545133
cg14232368	CD4+ T-cell	GRCh37	chrX	135736974
cg14318791	CD4+ T-cell	GRCh37	chr5	7858502
cg23783077	CD4+ T-cell	GRCh37	chr6	143849861
cg03855955	CD4+ T-cell	GRCh37	chr12	6900351
cg10068516	CD4+ T-cell	GRCh37	chr9	109678810
cg07919695	CD4+ T-cell	GRCh37	chrX	135729658
cg02992767	CD4+ T-cell	GRCh37	chrX	135729973
cg05316708	CD4+ T-cell	GRCh37	chr2	204815887
cg13238744	CD4+ T-cell	GRCh37	chr2	204579051
cg04162316	CD4+ T-cell	GRCh37	chr17	78786355
cg25633874	CD4+ T-cell	GRCh37	chr1	154433182
cg01044097	CD4+ T-cell	GRCh37	chr11	60884546
cg09154664	CD4+ T-cell	GRCh37	chr12	117359978
cg06146156	CD4+ T-cell	GRCh37	chr4	106043656
cg09759539	CD4+ T-cell	GRCh37	chr10	15203181
cg05617307	CD4+ T-cell	GRCh37	chr10	121413182
cg24069928	CD4+ T-cell	GRCh37	chr6	167366776
cg14113820	CD4+ T-cell	GRCh37	chr7	112213033
cg05044173	CD4+ T-cell	GRCh37	chr12	6898500
cg21609340	CD4+ T-cell	GRCh37	chr5	107191214
cg26852894	CD4+ T-cell	GRCh37	chr4	11157341
cg16921643	CD4+ T-cell	GRCh37	chr8	135513489
cg00292305	CD4+ T-cell	GRCh37	chrX	135729978
cg24247883	CD4+ T-cell	GRCh37	chr9	97177504
cg16696646	CD4+ T-cell	GRCh37	chr17	19861616
cg17518643	CD4+ T-cell	GRCh37	chr13	99969273
cg21274670	CD4+ T-cell	GRCh37	chr5	55498233
cg05969889	CD4+ T-cell	GRCh37	chr6	143418703
cg12464177	CD4+ T-cell	GRCh37	chr17	34035269
cg15260951	CD4+ T-cell	GRCh37	chr18	77165150
cg25381663	CD4+ T-cell	GRCh37	chr11	95421825
cg02570721	CD4+ T-cell	GRCh37	chr9	71509406
cg00949794	CD4+ T-cell	GRCh37	chr21	39721192
cg11171815	CD4+ T-cell	GRCh37	chr22	45571660
cg00077275	CD4+ T-cell	GRCh37	chr10	121415404
cg01154505	CD4+ T-cell	GRCh37	chr2	112940409
cg16008150	CD4+ T-cell	GRCh37	chr2	109231156
cg19376799	CD4+ T-cell	GRCh37	chr2	55758066
cg10083258	CD4+ T-cell	GRCh37	chr15	93362731
cg13142152	CD4+ T-cell	GRCh37	chr6	25026539
cg18835815	CD4+ T-cell	GRCh37	chr8	54757048
cg00944599	CD4+ T-cell	GRCh37	chr7	98479808
cg18146216	CD4+ T-cell	GRCh37	chr6	135438531
cg14588003	CD4+ T-cell	GRCh37	chr15	93361889
cg07898974	CD4+ T-cell	GRCh37	chr8	134837326
cg06443794	CD4+ T-cell	GRCh37	chr10	63754212
cg05770620	CD4+ T-cell	GRCh37	chr7	98479823
cg10837404	CD4+ T-cell	GRCh37	chr5	112356289
cg00219233	CD4+ T-cell	GRCh37	chr7	44488884
cg00614901	CD4+ T-cell	GRCh37	chr9	99735165
cg08012294	CD4+ T-cell	GRCh37	chr8	11723816
cg08004823	CD4+ T-cell	GRCh37	chr16	50783734
cg05290737	CD4+ T-cell	GRCh37	chr12	123215151
cg00045357	CD4+ T-cell	GRCh37	chr5	138750111
cg18201385	CD4+ T-cell	GRCh37	chr13	30415979
cg22181644	CD4+ T-cell	GRCh37	chr12	55376113
cg22324641	CD4+ T-cell	GRCh37	chr1	154986870
cg07010261	CD4+ T-cell	GRCh37	chr1	235066348
cg16871561	CD4+ T-cell	GRCh37	chr12	98986887
cg24330404	CD4+ T-cell	GRCh37	chr13	100010639
cg00208274	CD4+ T-cell	GRCh37	chr7	4779342
cg14006566	CD4+ T-cell	GRCh37	chr14	32046453
cg11301670	CD4+ T-cell	GRCh37	chr6	167363345
cg02403171	CD4+ T-cell	GRCh37	chr2	172167559
cg17746288	CD4+ T-cell	GRCh37	chr11	128350717
cg16887064	CD4+ T-cell	GRCh37	chr4	100767508
cg02343425	CD4+ T-cell	GRCh37	chr5	55352526
cg11728331	CD4+ T-cell	GRCh37	chr3	72008020
cg20146792	CD4+ T-cell	GRCh37	chr2	239168496
cg22033073	CD4+ T-cell	GRCh37	chr16	21608218
cg13714322	CD4+ T-cell	GRCh37	chr7	37399617
cg01210399	CD4+ T-cell	GRCh37	chr1	85100853
cg22560812	CD4+ T-cell	GRCh37	chr8	28180148
cg19235307	CD4+ T-cell	GRCh37	chr3	129160154
cg00356916	CD4+ T-cell	GRCh37	chr1	116256618
cg22731458	CD4+ T-cell	GRCh37	chr14	94518623
cg12626003	CD4+ T-cell	GRCh37	chr20	34407176
cg08310597	CD4+ T-cell	GRCh37	chr3	18911824
cg18303397	CD4+ T-cell	GRCh37	chr3	129160135
cg05931551	CD4+ T-cell	GRCh37	chr1	52892210
cg10425083	CD4+ T-cell	GRCh37	chr12	770801
cg22415463	CD4+ T-cell	GRCh37	chr3	129160472
cg01055226	CD4+ T-cell	GRCh37	chr14	24974007
cg24130641	CD4+ T-cell	GRCh37	chr21	45478471
cg21782213	CD4+ T-cell	GRCh37	chr8	100711935
cg04101478	CD4+ T-cell	GRCh37	chr1	154986500
cg11991412	CD8+ T-cell	GRCh37	chr21	32546573
cg00813999	CD8+ T-cell	GRCh37	chrX	77582839
cg16810279	CD8+ T-cell	GRCh37	chr17	76254129
cg05520031	CD8+ T-cell	GRCh37	chr9	129262012
cg15633035	CD8+ T-cell	GRCh37	chr1	154439516
cg04265842	CD8+ T-cell	GRCh37	chr3	156807650
cg21543859	CD8+ T-cell	GRCh37	chr6	45391645
cg26636279	CD8+ T-cell	GRCh37	chr3	112677997
cg08482894	CD8+ T-cell	GRCh37	chr3	49389050
cg17332306	CD8+ T-cell	GRCh37	chr17	76259456
cg19267340	CD8+ T-cell	GRCh37	chr7	139529391
cg09543427	CD8+ T-cell	GRCh37	chr3	13590350
cg03187661	CD8+ T-cell	GRCh37	chr3	20080268
cg08747006	CD8+ T-cell	GRCh37	chr14	77500753
cg25269447	CD8+ T-cell	GRCh37	chr21	32546322
cg09327655	CD8+ T-cell	GRCh37	chr15	42260283
cg12477370	CD8+ T-cell	GRCh37	chr6	45391852
cg09237512	CD8+ T-cell	GRCh37	chr4	79766735
cg08940994	CD8+ T-cell	GRCh37	chr11	122734623
cg13357602	CD8+ T-cell	GRCh37	chr6	30655720
cg25701596	CD8+ T-cell	GRCh37	chr11	71673864
cg04329870	CD8+ T-cell	GRCh37	chr2	87048747
cg18857618	CD8+ T-cell	GRCh37	chr2	87048489
cg00219921	CD8+ T-cell	GRCh37	chr2	87012810
cg05496363	CD8+ T-cell	GRCh37	chr11	66083766
cg06419846	CD8+ T-cell	GRCh37	chr11	66083697
cg18174654	CD8+ T-cell	GRCh37	chr2	87019612
cg11067179	CD8+ T-cell	GRCh37	chr11	66083541
cg01002223	CD8+ T-cell	GRCh37	chr1	8987034
cg07820882	CD8+ T-cell	GRCh37	chr2	86992166
cg07016730	CD8+ T-cell	GRCh37	chr22	50912306
cg17851021	CD8+ T-cell	GRCh37	chr5	1097374
cg27547947	CD8+ T-cell	GRCh37	chr14	32797165
cg18546384	CD8+ T-cell	GRCh37	chr7	2077057
cg07702659	CD8+ T-cell	GRCh37	chr1	228324020
cg25350872	CD8+ T-cell	GRCh37	chr7	158816149
cg13543915	CD8+ T-cell	GRCh37	chr9	134293793
cg13068915	CD8+ T-cell	GRCh37	chr17	60746154
cg04087102	CD8+ T-cell	GRCh37	chr1	44004704
cg09654116	CD8+ T-cell	GRCh37	chr7	158816213
cg03318654	CD8+ T-cell	GRCh37	chr2	87034200
cg04047276	CD8+ T-cell	GRCh37	chr11	3028418
cg23487884	CD8+ T-cell	GRCh37	chr22	36554399
cg11531557	CD8+ T-cell	GRCh37	chr8	28919234
cg22760563	CD8+ T-cell	GRCh37	chr16	57163207
cg18782488	CD8+ T-cell	GRCh37	chr7	134677557
cg01949403	CD8+ T-cell	GRCh37	chr22	36562402
cg16460111	CD8+ T-cell	GRCh37	chr2	131768124
cg20367218	CD8+ T-cell	GRCh37	chr11	66083224
cg05478809	CD8+ T-cell	GRCh37	chr11	66082889
cg03357684	CD8+ T-cell	GRCh37	chr1	8985145
cg18494987	CD8+ T-cell	GRCh37	chr7	155795506
cg07115032	CD8+ T-cell	GRCh37	chr11	122713816
cg13182145	CD8+ T-cell	GRCh37	chr9	16179702
cg09385972	CD8+ T-cell	GRCh37	chr16	772568
cg21091766	CD8+ T-cell	GRCh37	chr5	176898673
cg22091063	CD8+ T-cell	GRCh37	chr2	87010605
cg26796793	CD8+ T-cell	GRCh37	chr15	90451632
cg14171188	CD8+ T-cell	GRCh37	chr1	244218327
cg06682083	CD8+ T-cell	GRCh37	chr6	455213
cg22213242	CD8+ T-cell	GRCh37	chr11	66083573
cg22449583	CD8+ T-cell	GRCh37	chr14	99430808
cg16235995	CD8+ T-cell	GRCh37	chr14	32797149
cg10407106	CD8+ T-cell	GRCh37	chr7	99779719
cg22494876	CD8+ T-cell	GRCh37	chr1	247618161
cg04790521	CD8+ T-cell	GRCh37	chr6	86101402
cg18043014	CD8+ T-cell	GRCh37	chr11	681173
cg14027234	CD8+ T-cell	GRCh37	chr11	66084163
cg27445883	CD8+ T-cell	GRCh37	chr2	87089933
cg00702872	CD8+ T-cell	GRCh37	chr6	3524580
cg12344862	CD8+ T-cell	GRCh37	chr2	87019846
cg18711369	CD8+ T-cell	GRCh37	chr17	38081186
cg25535316	CD8+ T-cell	GRCh37	chr11	579198
cg07707056	CD8+ T-cell	GRCh37	chr22	36562416
cg02203103	CD8+ T-cell	GRCh37	chr12	6884261
cg24422171	CD8+ T-cell	GRCh37	chr2	225365163
cg18329839	CD8+ T-cell	GRCh37	chr1	8983171
cg09849552	CD8+ T-cell	GRCh37	chr2	87019492
cg21681637	CD8+ T-cell	GRCh37	chr2	7657353
cg21648425	CD8+ T-cell	GRCh37	chr2	87019192
cg07690127	CD8+ T-cell	GRCh37	chr7	2077293
cg06329135	CD8+ T-cell	GRCh37	chr3	39197515
cg05039671	CD8+ T-cell	GRCh37	chr4	40245120
cg08769189	CD8+ T-cell	GRCh37	chr15	55562403
cg04658357	CD8+ T-cell	GRCh37	chr17	18911043
cg23454735	CD8+ T-cell	GRCh37	chr1	151805773
cg18467034	CD8+ T-cell	GRCh37	chr7	155795476
cg22556056	CD8+ T-cell	GRCh37	chr17	2228003
cg03686455	CD8+ T-cell	GRCh37	chr7	2076998
cg16681873	CD8+ T-cell	GRCh37	chr19	1090978
cg18224038	CD8+ T-cell	GRCh37	chr2	87042671
cg01649465	CD8+ T-cell	GRCh37	chr5	148026664
cg20276769	CD8+ T-cell	GRCh37	chr16	68786937
cg02763540	CD8+ T-cell	GRCh37	chr19	4914183
cg07949587	CD8+ T-cell	GRCh37	chr3	194070884
cg25593631	CD8+ T-cell	GRCh37	chr1	9687880
cg23325335	CD8+ T-cell	GRCh37	chr15	99979290
cg21930227	CD8+ T-cell	GRCh37	chr1	109504047
cg21768679	CD8+ T-cell	GRCh37	chr19	16312932
cg26142122	CD8+ T-cell	GRCh37	chr11	118783123
cg23244761	Monocyte	GRCh37	chr6	161796850
cg20374292	Monocyte	GRCh37	chr14	69526817
cg00989306	Monocyte	GRCh37	chr11	129920441
cg15173892	Monocyte	GRCh37	chr18	76970215
cg07617198	Monocyte	GRCh37	chr8	129251285
cg18066690	Monocyte	GRCh37	chr8	48344060
cg16636767	Monocyte	GRCh37	chr11	13694647
cg10480329	Monocyte	GRCh37	chr2	27011850
cg22675702	Monocyte	GRCh37	chr17	20026062
cg10624395	Monocyte	GRCh37	chr11	110350574
cg26201751	Monocyte	GRCh37	chr1	186788381
cg23373670	Monocyte	GRCh37	chr8	119416080
cg00908794	Monocyte	GRCh37	chr14	69526840
cg02647842	Monocyte	GRCh37	chr17	33581722
cg21610657	Monocyte	GRCh37	chr1	159924239
cg21459713	Monocyte	GRCh37	chr8	623688
cg02007480	Monocyte	GRCh37	chr5	159761089
cg06636137	Monocyte	GRCh37	chr6	170120736
cg11826773	Monocyte	GRCh37	chr2	241645733
cg00771778	Monocyte	GRCh37	chr1	235998714
cg03963853	Monocyte	GRCh37	chr16	4732369
cg08844422	Monocyte	GRCh37	chr8	11743732
cg19336573	Monocyte	GRCh37	chr5	82696331
cg08908131	Monocyte	GRCh37	chr10	118706938
cg21185441	Monocyte	GRCh37	chr11	73134284
cg13708055	Monocyte	GRCh37	chr15	86123699
cg23312369	Monocyte	GRCh37	chr1	224398131
cg11183587	Monocyte	GRCh37	chr12	13213698
cg02244028	Monocyte	GRCh37	chr3	38992200
cg20290017	Monocyte	GRCh37	chr9	113831239
cg17195809	Monocyte	GRCh37	chr2	216620680
cg21951202	Monocyte	GRCh37	chr8	125715200
cg18356337	Monocyte	GRCh37	chr2	145459205
cg01407558	Monocyte	GRCh37	chr3	46339669
cg06297318	Monocyte	GRCh37	chr6	127667691
cg01842756	Monocyte	GRCh37	chr6	125330910
cg02290460	Monocyte	GRCh37	chr8	619875
cg25605773	Monocyte	GRCh37	chr4	140443230
cg08965078	Monocyte	GRCh37	chr2	85791320
cg03556458	Monocyte	GRCh37	chr5	135387559
cg05923857	Monocyte	GRCh37	chr10	114911615
cg13823977	Monocyte	GRCh37	chr19	52314719
cg08795956	Monocyte	GRCh37	chr1	167533139
cg10626407	Monocyte	GRCh37	chr15	97129317
cg00454138	Monocyte	GRCh37	chr17	73425089
cg03135975	Monocyte	GRCh37	chr14	71159191
cg23950707	Monocyte	GRCh37	chr20	31193047
cg19301114	Monocyte	GRCh37	chr6	161796785
cg12655112	Monocyte	GRCh37	chr15	42261154
cg03414235	Monocyte	GRCh37	chr11	116871510
cg26670366	Monocyte	GRCh37	chr17	67172411
cg23146741	Monocyte	GRCh37	chr8	42712312
cg14172797	Monocyte	GRCh37	chr17	64428103
cg04250661	Monocyte	GRCh37	chr4	160199879
cg18770149	Monocyte	GRCh37	chr1	149903180
cg02780988	Monocyte	GRCh37	chr17	39646994
cg13217762	Monocyte	GRCh37	chr10	17264509
cg27060893	Monocyte	GRCh37	chr19	40845275
cg22180675	Monocyte	GRCh37	chr8	41518719
cg11819120	Monocyte	GRCh37	chr13	49130981
cg09592164	Monocyte	GRCh37	chr4	25882914
cg04045544	Monocyte	GRCh37	chr16	27298091
cg17976620	Monocyte	GRCh37	chr16	66411067
cg24788483	Monocyte	GRCh37	chr10	114911652
cg26313925	Monocyte	GRCh37	chr8	75895997
cg11147744	Monocyte	GRCh37	chr11	12178038
cg26326621	Monocyte	GRCh37	chr14	77332983
cg12274883	Monocyte	GRCh37	chr6	159538356
cg13140887	Monocyte	GRCh37	chr3	30620333
cg03478159	Monocyte	GRCh37	chr12	112171952
cg23391288	Monocyte	GRCh37	chr13	49366203
cg11620863	Monocyte	GRCh37	chr18	55435948
cg01950767	Monocyte	GRCh37	chr6	163775257
cg22474767	Monocyte	GRCh37	chr8	96133173
cg01323602	Monocyte	GRCh37	chr9	89381669
cg24365417	Monocyte	GRCh37	chr2	178939184
cg00025197	Monocyte	GRCh37	chr2	240387066
cg11265106	Monocyte	GRCh37	chr8	93526766
cg01422293	Monocyte	GRCh37	chr16	66451175
cg09938677	Monocyte	GRCh37	chr1	218636703
cg12244957	Monocyte	GRCh37	chr8	144536872
cg12821663	Monocyte	GRCh37	chr22	38459051
cg24686420	Monocyte	GRCh37	chr8	48540511
cg04468741	Monocyte	GRCh37	chr11	12181467
cg19531495	Monocyte	GRCh37	chr6	14873242
cg09712616	Monocyte	GRCh37	chr16	11892591
cg04842938	Monocyte	GRCh37	chr11	122604195
cg08097676	Monocyte	GRCh37	chr17	2342381
cg25026693	Monocyte	GRCh37	chr11	122604193
cg27295905	Monocyte	GRCh37	chr22	23271715
cg10944237	Monocyte	GRCh37	chr8	124281350
cg14837810	Monocyte	GRCh37	chr20	10021017
cg11249357	Monocyte	GRCh37	chr11	126184057
cg12585734	Monocyte	GRCh37	chr4	85494992
cg06926741	Monocyte	GRCh37	chr2	188289072
cg05065075	Monocyte	GRCh37	chr17	36476531
cg14898005	Monocyte	GRCh37	chr16	28118377
cg27249387	Monocyte	GRCh37	chr19	52762474
cg21793795	Monocyte	GRCh37	chr20	45753168
cg00904947	Monocyte	GRCh37	chr10	86123231
cg05398700	Neutrophil	GRCh37	chr14	102677141
cg25739938	Neutrophil	GRCh37	chr2	9610621
cg20030158	Neutrophil	GRCh37	chr5	176966387
cg10914422	Neutrophil	GRCh37	chr8	22942730
cg00705730	Neutrophil	GRCh37	chr2	106438120
cg27546908	Neutrophil	GRCh37	chr22	50586605
cg06270401	Neutrophil	GRCh37	chr12	4699085
cg13699412	Neutrophil	GRCh37	chr4	101958635
cg03637218	Neutrophil	GRCh37	chr5	115209107
cg14054880	Neutrophil	GRCh37	chr3	9433589
cg01899759	Neutrophil	GRCh37	chr10	69678304
cg16567823	Neutrophil	GRCh37	chr16	85815790
cg19037107	Neutrophil	GRCh37	chr11	134126323
cg27557168	Neutrophil	GRCh37	chr13	74277988
cg03254865	Neutrophil	GRCh37	chr5	70790128
cg01692842	Neutrophil	GRCh37	chr11	134126364
cg01893721	Neutrophil	GRCh37	chr21	35174647
cg25372386	Neutrophil	GRCh37	chr14	103870751
cg07281649	Neutrophil	GRCh37	chr17	44248599
cg15107418	Neutrophil	GRCh37	chr10	5791876
cg18623452	Neutrophil	GRCh37	chr6	106382714
cg12621097	Neutrophil	GRCh37	chr9	88151643
cg15421041	Neutrophil	GRCh37	chr7	72856835
cg08114611	Neutrophil	GRCh37	chr5	94172463
cg04858164	Neutrophil	GRCh37	chr15	57324333
cg07619820	Neutrophil	GRCh37	chr13	41796017
cg19935471	Neutrophil	GRCh37	chr8	99048265
cg23946394	Neutrophil	GRCh37	chr9	134924497
cg11014468	Neutrophil	GRCh37	chr3	53362965
cg07223007	Neutrophil	GRCh37	chr5	158643122
cg17143549	Neutrophil	GRCh37	chr1	43867796
cg23700338	Neutrophil	GRCh37	chr1	21326868
cg17781418	Neutrophil	GRCh37	chr3	71305262
cg17852482	Neutrophil	GRCh37	chr17	80833054
cg05956380	Neutrophil	GRCh37	chr8	42350016
cg25803263	Neutrophil	GRCh37	chr17	61649698
cg25600606	Neutrophil	GRCh37	chr11	33308345
cg16649792	Neutrophil	GRCh37	chr5	34001680
cg01699630	Neutrophil	GRCh37	chr6	131894023
cg15724534	Neutrophil	GRCh37	chr2	211018363
cg11328284	Neutrophil	GRCh37	chr2	168932113
cg13190003	Neutrophil	GRCh37	chr1	173193738
cg02015961	Neutrophil	GRCh37	chr8	20061515
cg07195748	Neutrophil	GRCh37	chr8	126503599
cg05936004	Neutrophil	GRCh37	chr3	130693828
cg08376705	Neutrophil	GRCh37	chr16	31180333
cg10902724	Neutrophil	GRCh37	chr11	72641243
cg13155300	Neutrophil	GRCh37	chr21	47234029
cg26314172	Neutrophil	GRCh37	chr8	59815381
cg13852284	Neutrophil	GRCh37	chr10	77548353
cg16683571	Neutrophil	GRCh37	chr9	128099545
cg23338668	Neutrophil	GRCh37	chr8	74240259
cg04082721	Neutrophil	GRCh37	chr16	85815851
cg11070172	Neutrophil	GRCh37	chr14	23586812
cg03884100	Neutrophil	GRCh37	chr17	44248641
cg21792134	Neutrophil	GRCh37	chr3	121491382
cg01328348	Neutrophil	GRCh37	chr1	160839299
cg03146219	Neutrophil	GRCh37	chr11	71189514
cg25006077	Neutrophil	GRCh37	chr3	152176018
cg14352586	Neutrophil	GRCh37	chr9	101594150
cg25576801	Neutrophil	GRCh37	chr10	49932245
cg12511021	Neutrophil	GRCh37	chr14	103157425
cg24478125	Neutrophil	GRCh37	chr5	143524691
cg15527175	Neutrophil	GRCh37	chr1	95532966
cg00477015	Neutrophil	GRCh37	chr1	193082550
cg22913250	Neutrophil	GRCh37	chr20	60762088
cg04533831	Neutrophil	GRCh37	chr14	102499390
cg11204583	Neutrophil	GRCh37	chr5	14325937
cg11181843	Neutrophil	GRCh37	chr12	110816408
cg19174924	Neutrophil	GRCh37	chr8	68287227
cg19580293	Neutrophil	GRCh37	chr10	126790228
cg20077668	Neutrophil	GRCh37	chr12	26649248
cg02467034	Neutrophil	GRCh37	chr7	132978646
cg08154963	Neutrophil	GRCh37	chr17	33426885
cg26061447	Neutrophil	GRCh37	chr15	101190733
cg13618969	Neutrophil	GRCh37	chr9	129184186
cg09342997	Neutrophil	GRCh37	chr7	129339065
cg11483312	Neutrophil	GRCh37	chr1	100294047
cg01639416	Neutrophil	GRCh37	chr9	33319097
cg08218512	Neutrophil	GRCh37	chr7	48284271
cg14156706	Neutrophil	GRCh37	chr17	76850247
cg24131359	Neutrophil	GRCh37	chr12	69346994
cg26891362	Neutrophil	GRCh37	chr2	216995507
cg02735685	Neutrophil	GRCh37	chr12	53924036
cg01923724	Neutrophil	GRCh37	chr1	58864209
cg21350406	Neutrophil	GRCh37	chr11	73116210
cg01821345	Neutrophil	GRCh37	chr17	40407147
cg11377569	Neutrophil	GRCh37	chr1	22799114
cg04306184	Neutrophil	GRCh37	chr6	157394950
cg18646784	Neutrophil	GRCh37	chr1	44799317
cg09948350	Neutrophil	GRCh37	chr2	70189092
cg00501765	Neutrophil	GRCh37	chr1	172410217
cg07431832	Neutrophil	GRCh37	chr18	9215818
cg07790752	Neutrophil	GRCh37	chr1	147101904
cg24276541	Neutrophil	GRCh37	chr11	59806469
cg19260752	Neutrophil	GRCh37	chr7	148869183
cg04179951	Neutrophil	GRCh37	chr15	78317696
cg16795974	Neutrophil	GRCh37	chr10	3507176
cg21285555	Neutrophil	GRCh37	chr8	52771466
cg24636906	Neutrophil	GRCh37	chr13	110324345
cg05875239	Natural killer cell	GRCh37	chr14	99787559
cg13617280	Natural killer cell	GRCh37	chr12	129299462
cg27274718	Natural killer cell	GRCh37	chr3	15772890
cg18629096	Natural killer cell	GRCh37	chr1	199056675
cg00594040	Natural killer cell	GRCh37	chr2	8422258
cg03538296	Natural killer cell	GRCh37	chr1	15392433
cg26573274	Natural killer cell	GRCh37	chr13	110386152
cg24410690	Natural killer cell	GRCh37	chr12	129299481
cg23178790	Natural killer cell	GRCh37	chr3	171865189
cg20478760	Natural killer cell	GRCh37	chr19	55428224
cg04737115	Natural killer cell	GRCh37	chr1	65356919
cg00949861	Natural killer cell	GRCh37	chr12	9982579
cg18584272	Natural killer cell	GRCh37	chr7	2402526
cg05355684	Natural killer cell	GRCh37	chr16	88720379
cg24430034	Natural killer cell	GRCh37	chr13	110386176
cg12500857	Natural killer cell	GRCh37	chr7	73645930
cg14047092	Natural killer cell	GRCh37	chr2	122262844
cg19925256	Natural killer cell	GRCh37	chr12	50975459
cg18546155	Natural killer cell	GRCh37	chr2	24844850
cg21695906	Natural killer cell	GRCh37	chr18	77078951
cg21063192	Natural killer cell	GRCh37	chr1	164744310
cg16147236	Natural killer cell	GRCh37	chr3	5056202
cg26275360	Natural killer cell	GRCh37	chr8	52852168
cg08609318	Natural killer cell	GRCh37	chr1	164744436
cg08326410	Natural killer cell	GRCh37	chr19	55314884
cg19915997	Natural killer cell	GRCh37	chr3	15492725
cg10745620	Natural killer cell	GRCh37	chr3	128484039
cg11173571	Natural killer cell	GRCh37	chr18	53142947
cg17211761	Natural killer cell	GRCh37	chr17	1096626
cg15757195	Natural killer cell	GRCh37	chr2	8422332
cg00482026	Natural killer cell	GRCh37	chr7	133049843
cg25516230	Natural killer cell	GRCh37	chr1	162375677
cg16995933	Natural killer cell	GRCh37	chr22	47352496
cg02195105	Natural killer cell	GRCh37	chr10	44805846
cg13917614	Natural killer cell	GRCh37	chr17	40125660
cg27495654	Natural killer cell	GRCh37	chr8	48623951
cg12157735	Natural killer cell	GRCh37	chr6	108989514
cg12991263	Natural killer cell	GRCh37	chrX	7005511
cg25386954	Natural killer cell	GRCh37	chr5	60640139
cg05148385	Natural killer cell	GRCh37	chr2	213950646
cg24169118	Natural killer cell	GRCh37	chr6	52185338
cg27040968	Natural killer cell	GRCh37	chr14	99787363
cg02855870	Natural killer cell	GRCh37	chr7	132514425
cg05251703	Natural killer cell	GRCh37	chr19	19532262
cg24776221	Natural killer cell	GRCh37	chr3	124727839
cg02480298	Natural killer cell	GRCh37	chr11	36421230
cg09571697	Natural killer cell	GRCh37	chr4	151494375
cg25426716	Natural killer cell	GRCh37	chr5	125695699
cg21180201	Natural killer cell	GRCh37	chr7	1983503
cg10595862	Natural killer cell	GRCh37	chr8	61454404
cg22312628	Natural killer cell	GRCh37	chr5	125695774
cg03559700	Natural killer cell	GRCh37	chr2	160059427
cg10206039	Natural killer cell	GRCh37	chr1	1157637
cg19563355	Natural killer cell	GRCh37	chr15	28419658
cg08289710	Natural killer cell	GRCh37	chr6	4791647
cg09304968	Natural killer cell	GRCh37	chr7	76977748
cg24137511	Natural killer cell	GRCh37	chr19	18260330
cg05374531	Natural killer cell	GRCh37	chr7	132114646
cg08530578	Natural killer cell	GRCh37	chr19	19532322
cg01813254	Natural killer cell	GRCh37	chr11	9036548
cg15119324	Natural killer cell	GRCh37	chr3	171864416
cg00510903	Natural killer cell	GRCh37	chr14	93183900
cg22834511	Natural killer cell	GRCh37	chr2	8423122
cg15956469	Natural killer cell	GRCh37	chr12	10465272
cg14791799	Natural killer cell	GRCh37	chr13	24227716
cg12627590	Natural killer cell	GRCh37	chr3	152146537
cg10592926	Natural killer cell	GRCh37	chr6	157876961
cg13292607	Natural killer cell	GRCh37	chr10	126751950
cg18948661	Natural killer cell	GRCh37	chr19	55314837
cg07802362	Natural killer cell	GRCh37	chr1	172313798
cg02764745	Natural killer cell	GRCh37	chr7	127547434
cg22015486	Natural killer cell	GRCh37	chr1	182925377
cg14058851	Natural killer cell	GRCh37	chr6	15505949
cg17257126	Natural killer cell	GRCh37	chr2	45666295
cg07543798	Natural killer cell	GRCh37	chr7	37209431
cg19688999	Natural killer cell	GRCh37	chr10	59961765
cg19678940	Natural killer cell	GRCh37	chr7	66255551
cg12611860	Natural killer cell	GRCh37	chr11	17191617
cg21275838	Natural killer cell	GRCh37	chr15	59608124
cg05508074	Natural killer cell	GRCh37	chr14	52720463
cg15705930	Natural killer cell	GRCh37	chr5	123973317
cg01454237	Natural killer cell	GRCh37	chr19	55314879
cg17654020	Natural killer cell	GRCh37	chr4	143698418
cg13620110	Natural killer cell	GRCh37	chr19	10226628
cg25550975	Natural killer cell	GRCh37	chr2	120686376
cg16360310	Natural killer cell	GRCh37	chr5	139036605
cg14159660	Natural killer cell	GRCh37	chr5	14817367
cg22061556	Natural killer cell	GRCh37	chr6	92147212
cg18423456	Natural killer cell	GRCh37	chr4	159817224
cg23779286	Natural killer cell	GRCh37	chr1	115032585
cg03286826	Natural killer cell	GRCh37	chr8	66854720
cg18999855	Natural killer cell	GRCh37	chr6	161663295
cg12286351	Natural killer cell	GRCh37	chr9	127425591
cg05253716	Natural killer cell	GRCh37	chr12	129299332
cg05593759	Natural killer cell	GRCh37	chr5	125695848
cg21373263	Natural killer cell	GRCh37	chr10	126751982
cg01112784	Natural killer cell	GRCh37	chr10	62671136
cg08907176	Natural killer cell	GRCh37	chr7	66255624
cg18857340	Natural killer cell	GRCh37	chr4	38120337
cg23117283	Natural killer cell	GRCh37	chr2	98364274

## Sheet: Immune_cells_WGBS_Regions
Cell_type	Chromosome	Start	End	Genome_build
B-cell	chr11	65885275	65885475	GRCh37
B-cell	chr17	65431211	65431411	GRCh37
B-cell	chr1	181101496	181101696	GRCh37
B-cell	chr1	236588206	236588406	GRCh37
B-cell	chr1	63275607	63275807	GRCh37
B-cell	chr1	93440804	93441004	GRCh37
B-cell	chr10	5858446	5858646	GRCh37
B-cell	chr11	128441203	128441403	GRCh37
B-cell	chr11	35293244	35293444	GRCh37
B-cell	chr12	109193715	109193915	GRCh37
B-cell	chr12	111058545	111058745	GRCh37
B-cell	chr12	122889763	122889963	GRCh37
B-cell	chr12	132255516	132255716	GRCh37
B-cell	chr12	4277229	4277429	GRCh37
B-cell	chr12	57681824	57682024	GRCh37
B-cell	chr12	93204374	93204574	GRCh37
B-cell	chr12	9865439	9865639	GRCh37
B-cell	chr13	111328126	111328326	GRCh37
B-cell	chr13	24419802	24420002	GRCh37
B-cell	chr14	103365241	103365441	GRCh37
B-cell	chr14	70131932	70132132	GRCh37
B-cell	chr15	64381563	64381763	GRCh37
B-cell	chr15	94800991	94801191	GRCh37
B-cell	chr16	30336313	30336513	GRCh37
B-cell	chr16	46843051	46843251	GRCh37
B-cell	chr16	88079920	88080120	GRCh37
B-cell	chr16	89441402	89441602	GRCh37
B-cell	chr16	89441517	89441717	GRCh37
B-cell	chr17	27215871	27216071	GRCh37
B-cell	chr17	27215975	27216175	GRCh37
B-cell	chr17	3493610	3493810	GRCh37
B-cell	chr17	46451347	46451547	GRCh37
B-cell	chr17	73660019	73660219	GRCh37
B-cell	chr18	33640423	33640623	GRCh37
B-cell	chr18	74677631	74677831	GRCh37
B-cell	chr19	13216727	13216927	GRCh37
B-cell	chr19	15364449	15364649	GRCh37
B-cell	chr19	17638504	17638704	GRCh37
B-cell	chr19	17863656	17863856	GRCh37
B-cell	chr19	38452928	38453128	GRCh37
B-cell	chr2	135031820	135032020	GRCh37
B-cell	chr2	180870346	180870546	GRCh37
B-cell	chr2	25786680	25786880	GRCh37
B-cell	chr2	3258189	3258389	GRCh37
B-cell	chr2	3258346	3258546	GRCh37
B-cell	chr2	46064356	46064556	GRCh37
B-cell	chr20	35613037	35613237	GRCh37
B-cell	chr20	49199186	49199386	GRCh37
B-cell	chr22	23612255	23612455	GRCh37
B-cell	chr22	24095069	24095269	GRCh37
B-cell	chr22	47164351	47164551	GRCh37
B-cell	chr3	121512365	121512565	GRCh37
B-cell	chr3	30761136	30761336	GRCh37
B-cell	chr3	36932901	36933101	GRCh37
B-cell	chr3	42082119	42082319	GRCh37
B-cell	chr3	9694794	9694994	GRCh37
B-cell	chr4	16235197	16235397	GRCh37
B-cell	chr4	185317351	185317551	GRCh37
B-cell	chr4	2698524	2698724	GRCh37
B-cell	chr4	84143335	84143535	GRCh37
B-cell	chr5	112260691	112260891	GRCh37
B-cell	chr5	132439043	132439243	GRCh37
B-cell	chr5	64364375	64364575	GRCh37
B-cell	chr7	105714720	105714920	GRCh37
B-cell	chr7	1062888	1063088	GRCh37
B-cell	chr7	129790500	129790700	GRCh37
B-cell	chr7	24972630	24972830	GRCh37
B-cell	chr7	5270759	5270959	GRCh37
B-cell	chr7	5270863	5271063	GRCh37
B-cell	chr8	103577026	103577226	GRCh37
B-cell	chr8	19706299	19706499	GRCh37
B-cell	chr8	22387378	22387578	GRCh37
B-cell	chr8	38762746	38762946	GRCh37
B-cell	chr8	81011673	81011873	GRCh37
B-cell	chr8	81070762	81070962	GRCh37
B-cell	chr9	115537067	115537267	GRCh37
B-cell	chr9	115537178	115537378	GRCh37
B-cell	chr9	140653550	140653750	GRCh37
B-cell	chr9	37163428	37163628	GRCh37
B-cell	chr9	37189502	37189702	GRCh37
B-cell	chr9	37337504	37337704	GRCh37
B-cell	chr20	49199308	49199508	GRCh37
B-cell	chr2	25786825	25787025	GRCh37
B-cell	chr16	3605498	3605698	GRCh37
B-cell	chr6	156957380	156957580	GRCh37
B-cell	chr6	155135224	155135424	GRCh37
B-cell	chr7	36982700	36982900	GRCh37
B-cell	chr10	63864727	63864927	GRCh37
B-cell	chr18	77256207	77256407	GRCh37
B-cell	chr11	68581319	68581519	GRCh37
B-cell	chr10	12120379	12120579	GRCh37
B-cell	chr2	209183558	209183758	GRCh37
B-cell	chr19	1265206	1265406	GRCh37
B-cell	chr13	31018330	31018530	GRCh37
B-cell	chr14	96959418	96959618	GRCh37
B-cell	chr2	228229367	228229567	GRCh37
B-cell	chr15	57390049	57390249	GRCh37
B-cell	chr6	89341806	89342006	GRCh37
B-cell	chr6	218327	218527	GRCh37
B-cell	chr7	28208034	28208234	GRCh37
CD4+ T-cell	chr1	25324402	25324602	GRCh37
CD4+ T-cell	chr11	122588106	122588306	GRCh37
CD4+ T-cell	chr16	57682057	57682257	GRCh37
CD4+ T-cell	chr22	43321683	43321883	GRCh37
CD4+ T-cell	chr2	12197569	12197769	GRCh37
CD4+ T-cell	chr6	15300012	15300212	GRCh37
CD4+ T-cell	chr4	84060165	84060365	GRCh37
CD4+ T-cell	chr12	94567476	94567676	GRCh37
CD4+ T-cell	chr1	154985498	154985698	GRCh37
CD4+ T-cell	chr1	19845267	19845467	GRCh37
CD4+ T-cell	chr1	232259803	232260003	GRCh37
CD4+ T-cell	chr1	234544207	234544407	GRCh37
CD4+ T-cell	chr1	234544428	234544628	GRCh37
CD4+ T-cell	chr1	234544544	234544744	GRCh37
CD4+ T-cell	chr1	234544723	234544923	GRCh37
CD4+ T-cell	chr1	234544869	234545069	GRCh37
CD4+ T-cell	chr1	234545031	234545231	GRCh37
CD4+ T-cell	chr1	8480861	8481061	GRCh37
CD4+ T-cell	chr1	8480964	8481164	GRCh37
CD4+ T-cell	chr1	92057642	92057842	GRCh37
CD4+ T-cell	chr10	112615647	112615847	GRCh37
CD4+ T-cell	chr10	35300917	35301117	GRCh37
CD4+ T-cell	chr11	60802917	60803117	GRCh37
CD4+ T-cell	chr11	60860259	60860459	GRCh37
CD4+ T-cell	chr11	60884383	60884583	GRCh37
CD4+ T-cell	chr11	67652020	67652220	GRCh37
CD4+ T-cell	chr12	110820594	110820794	GRCh37
CD4+ T-cell	chr12	24459010	24459210	GRCh37
CD4+ T-cell	chr12	6900549	6900749	GRCh37
CD4+ T-cell	chr12	90624345	90624545	GRCh37
CD4+ T-cell	chr12	90624701	90624901	GRCh37
CD4+ T-cell	chr13	100005013	100005213	GRCh37
CD4+ T-cell	chr13	81129127	81129327	GRCh37
CD4+ T-cell	chr15	58541854	58542054	GRCh37
CD4+ T-cell	chr15	91863194	91863394	GRCh37
CD4+ T-cell	chr16	30541599	30541799	GRCh37
CD4+ T-cell	chr16	50783562	50783762	GRCh37
CD4+ T-cell	chr16	50783664	50783864	GRCh37
CD4+ T-cell	chr16	50825356	50825556	GRCh37
CD4+ T-cell	chr17	16809722	16809922	GRCh37
CD4+ T-cell	chr17	46490500	46490700	GRCh37
CD4+ T-cell	chr17	78786073	78786273	GRCh37
CD4+ T-cell	chr18	56364652	56364852	GRCh37
CD4+ T-cell	chr18	67622503	67622703	GRCh37
CD4+ T-cell	chr2	112940627	112940827	GRCh37
CD4+ T-cell	chr2	12636315	12636515	GRCh37
CD4+ T-cell	chr2	153259306	153259506	GRCh37
CD4+ T-cell	chr2	204596779	204596979	GRCh37
CD4+ T-cell	chr2	204718338	204718538	GRCh37
CD4+ T-cell	chr2	204808078	204808278	GRCh37
CD4+ T-cell	chr2	204808551	204808751	GRCh37
CD4+ T-cell	chr2	205898994	205899194	GRCh37
CD4+ T-cell	chr2	235231481	235231681	GRCh37
CD4+ T-cell	chr2	239168651	239168851	GRCh37
CD4+ T-cell	chr2	59689626	59689826	GRCh37
CD4+ T-cell	chr2	70438353	70438553	GRCh37
CD4+ T-cell	chr2	86695791	86695991	GRCh37
CD4+ T-cell	chr20	4850174	4850374	GRCh37
CD4+ T-cell	chr21	32555164	32555364	GRCh37
CD4+ T-cell	chr21	32557123	32557323	GRCh37
CD4+ T-cell	chr21	32558415	32558615	GRCh37
CD4+ T-cell	chr22	30001073	30001273	GRCh37
CD4+ T-cell	chr22	31980386	31980586	GRCh37
CD4+ T-cell	chr3	129930868	129931068	GRCh37
CD4+ T-cell	chr4	100767406	100767606	GRCh37
CD4+ T-cell	chr4	143478177	143478377	GRCh37
CD4+ T-cell	chr5	107135431	107135631	GRCh37
CD4+ T-cell	chr5	112282082	112282282	GRCh37
CD4+ T-cell	chr5	55280254	55280454	GRCh37
CD4+ T-cell	chr5	67551978	67552178	GRCh37
CD4+ T-cell	chr7	77543509	77543709	GRCh37
CD4+ T-cell	chr7	98739501	98739701	GRCh37
CD4+ T-cell	chr8	11723210	11723410	GRCh37
CD4+ T-cell	chr8	11723357	11723557	GRCh37
CD4+ T-cell	chr8	11723504	11723704	GRCh37
CD4+ T-cell	chr8	11724221	11724421	GRCh37
CD4+ T-cell	chr8	119351689	119351889	GRCh37
CD4+ T-cell	chr8	19250779	19250979	GRCh37
CD4+ T-cell	chr8	61780950	61781150	GRCh37
CD4+ T-cell	chr8	8719325	8719525	GRCh37
CD4+ T-cell	chr11	60803027	60803227	GRCh37
CD4+ T-cell	chr15	58541962	58542162	GRCh37
CD4+ T-cell	chr1	92057746	92057946	GRCh37
CD4+ T-cell	chr7	90721101	90721301	GRCh37
CD4+ T-cell	chr7	69299576	69299776	GRCh37
CD4+ T-cell	chr3	19031285	19031485	GRCh37
CD4+ T-cell	chr2	30484456	30484656	GRCh37
CD4+ T-cell	chr6	169884272	169884472	GRCh37
CD4+ T-cell	chr3	188915009	188915209	GRCh37
CD4+ T-cell	chr8	11723714	11723914	GRCh37
CD4+ T-cell	chr11	8485743	8485943	GRCh37
CD4+ T-cell	chr9	97744841	97745041	GRCh37
CD4+ T-cell	chr20	31965447	31965647	GRCh37
CD4+ T-cell	chr1	108281112	108281312	GRCh37
CD4+ T-cell	chr15	75882767	75882967	GRCh37
CD4+ T-cell	chr6	135438404	135438604	GRCh37
CD4+ T-cell	chr21	19059012	19059212	GRCh37
CD4+ T-cell	chr1	243994681	243994881	GRCh37
CD4+ T-cell	chr11	95032566	95032766	GRCh37
CD4+ T-cell	chr8	42387490	42387690	GRCh37
CD8+ T-cell	chr1	15416952	15417152	GRCh37
CD8+ T-cell	chr1	1790105	1790305	GRCh37
CD8+ T-cell	chr1	23869575	23869775	GRCh37
CD8+ T-cell	chr1	27546189	27546389	GRCh37
CD8+ T-cell	chr1	33721121	33721321	GRCh37
CD8+ T-cell	chr10	1939737	1939937	GRCh37
CD8+ T-cell	chr10	25051618	25051818	GRCh37
CD8+ T-cell	chr10	43722230	43722430	GRCh37
CD8+ T-cell	chr10	88470366	88470566	GRCh37
CD8+ T-cell	chr11	66608774	66608974	GRCh37
CD8+ T-cell	chr11	78141318	78141518	GRCh37
CD8+ T-cell	chr12	102536550	102536750	GRCh37
CD8+ T-cell	chr14	55221287	55221487	GRCh37
CD8+ T-cell	chr15	69561334	69561534	GRCh37
CD8+ T-cell	chr16	28185115	28185315	GRCh37
CD8+ T-cell	chr17	61992140	61992340	GRCh37
CD8+ T-cell	chr17	78128286	78128486	GRCh37
CD8+ T-cell	chr19	47296740	47296940	GRCh37
CD8+ T-cell	chr2	161341196	161341396	GRCh37
CD8+ T-cell	chr2	28115944	28116144	GRCh37
CD8+ T-cell	chr2	95742160	95742360	GRCh37
CD8+ T-cell	chr20	31559183	31559383	GRCh37
CD8+ T-cell	chr20	61524548	61524748	GRCh37
CD8+ T-cell	chr21	30568348	30568548	GRCh37
CD8+ T-cell	chr3	126338990	126339190	GRCh37
CD8+ T-cell	chr3	188587622	188587822	GRCh37
CD8+ T-cell	chr3	189074058	189074258	GRCh37
CD8+ T-cell	chr3	47939222	47939422	GRCh37
CD8+ T-cell	chr3	58189828	58190028	GRCh37
CD8+ T-cell	chr4	103210934	103211134	GRCh37
CD8+ T-cell	chr4	154395750	154395950	GRCh37
CD8+ T-cell	chr5	1613772	1613972	GRCh37
CD8+ T-cell	chr5	95170131	95170331	GRCh37
CD8+ T-cell	chr6	33748116	33748316	GRCh37
CD8+ T-cell	chr7	148774056	148774256	GRCh37
CD8+ T-cell	chr7	20132681	20132881	GRCh37
CD8+ T-cell	chr7	50422522	50422722	GRCh37
CD8+ T-cell	chr7	5468449	5468649	GRCh37
CD8+ T-cell	chr8	141259057	141259257	GRCh37
CD8+ T-cell	chr9	129262001	129262201	GRCh37
CD8+ T-cell	chr9	140348310	140348510	GRCh37
CD8+ T-cell	chr9	93509984	93510184	GRCh37
CD8+ T-cell	chr5	158186365	158186565	GRCh37
CD8+ T-cell	chr19	2289378	2289578	GRCh37
CD8+ T-cell	chr16	30560897	30561097	GRCh37
CD8+ T-cell	chr8	105744229	105744429	GRCh37
CD8+ T-cell	chr1	11413368	11413568	GRCh37
CD8+ T-cell	chr1	21163874	21164074	GRCh37
CD8+ T-cell	chr1	65406483	65406683	GRCh37
CD8+ T-cell	chr1	98510904	98511104	GRCh37
CD8+ T-cell	chr10	134707117	134707317	GRCh37
CD8+ T-cell	chr10	98433107	98433307	GRCh37
CD8+ T-cell	chr11	122710447	122710647	GRCh37
CD8+ T-cell	chr11	65408528	65408728	GRCh37
CD8+ T-cell	chr13	49078632	49078832	GRCh37
CD8+ T-cell	chr15	100050083	100050283	GRCh37
CD8+ T-cell	chr15	40344271	40344471	GRCh37
CD8+ T-cell	chr15	40344405	40344605	GRCh37
CD8+ T-cell	chr16	27461072	27461272	GRCh37
CD8+ T-cell	chr16	56435053	56435253	GRCh37
CD8+ T-cell	chr16	68007192	68007392	GRCh37
CD8+ T-cell	chr17	19976467	19976667	GRCh37
CD8+ T-cell	chr17	44850670	44850870	GRCh37
CD8+ T-cell	chr17	8353295	8353495	GRCh37
CD8+ T-cell	chr19	19293229	19293429	GRCh37
CD8+ T-cell	chr19	41269848	41270048	GRCh37
CD8+ T-cell	chr19	41270104	41270304	GRCh37
CD8+ T-cell	chr19	58298830	58299030	GRCh37
CD8+ T-cell	chr2	42445517	42445717	GRCh37
CD8+ T-cell	chr2	86992064	86992264	GRCh37
CD8+ T-cell	chr2	87012946	87013146	GRCh37
CD8+ T-cell	chr2	87013811	87014011	GRCh37
CD8+ T-cell	chr2	87014166	87014366	GRCh37
CD8+ T-cell	chr2	87014470	87014670	GRCh37
CD8+ T-cell	chr2	87014675	87014875	GRCh37
CD8+ T-cell	chr2	87019510	87019710	GRCh37
CD8+ T-cell	chr2	87033736	87033936	GRCh37
CD8+ T-cell	chr2	87037709	87037909	GRCh37
CD8+ T-cell	chr2	87037997	87038197	GRCh37
CD8+ T-cell	chr2	87039451	87039651	GRCh37
CD8+ T-cell	chr2	87045382	87045582	GRCh37
CD8+ T-cell	chr2	87050363	87050563	GRCh37
CD8+ T-cell	chr2	87050713	87050913	GRCh37
CD8+ T-cell	chr2	87051352	87051552	GRCh37
CD8+ T-cell	chr2	87067800	87068000	GRCh37
CD8+ T-cell	chr2	87070166	87070366	GRCh37
CD8+ T-cell	chr22	42228346	42228546	GRCh37
CD8+ T-cell	chr3	119753697	119753897	GRCh37
CD8+ T-cell	chr3	141942882	141943082	GRCh37
CD8+ T-cell	chr4	121911510	121911710	GRCh37
CD8+ T-cell	chr4	146857085	146857285	GRCh37
CD8+ T-cell	chr5	131806657	131806857	GRCh37
CD8+ T-cell	chr6	166757675	166757875	GRCh37
CD8+ T-cell	chr7	133164704	133164904	GRCh37
CD8+ T-cell	chr7	2077006	2077206	GRCh37
CD8+ T-cell	chr7	98586571	98586771	GRCh37
CD8+ T-cell	chr11	65408630	65408830	GRCh37
CD8+ T-cell	chr10	5745606	5745806	GRCh37
CD8+ T-cell	chr10	12393523	12393723	GRCh37
CD8+ T-cell	chr18	74737211	74737411	GRCh37
Monocyte	chr10	26757782	26757982	GRCh37
Monocyte	chr16	53491782	53491982	GRCh37
Monocyte	chr4	154443088	154443288	GRCh37
Monocyte	chr1	15051134	15051334	GRCh37
Monocyte	chr1	150747933	150748133	GRCh37
Monocyte	chr1	17371870	17372070	GRCh37
Monocyte	chr1	179309938	179310138	GRCh37
Monocyte	chr1	204540187	204540387	GRCh37
Monocyte	chr1	207346463	207346663	GRCh37
Monocyte	chr1	224398029	224398229	GRCh37
Monocyte	chr1	229780410	229780610	GRCh37
Monocyte	chr1	231746198	231746398	GRCh37
Monocyte	chr1	241977051	241977251	GRCh37
Monocyte	chr1	40299730	40299930	GRCh37
Monocyte	chr10	61599670	61599870	GRCh37
Monocyte	chr10	74303662	74303862	GRCh37
Monocyte	chr10	86123112	86123312	GRCh37
Monocyte	chr11	103741524	103741724	GRCh37
Monocyte	chr11	110852560	110852760	GRCh37
Monocyte	chr11	129996567	129996767	GRCh37
Monocyte	chr11	17120370	17120570	GRCh37
Monocyte	chr11	73265902	73266102	GRCh37
Monocyte	chr11	73733827	73734027	GRCh37
Monocyte	chr11	94223033	94223233	GRCh37
Monocyte	chr12	10273421	10273621	GRCh37
Monocyte	chr12	106640128	106640328	GRCh37
Monocyte	chr12	111623824	111624024	GRCh37
Monocyte	chr12	22830463	22830663	GRCh37
Monocyte	chr12	7653838	7654038	GRCh37
Monocyte	chr12	83242642	83242842	GRCh37
Monocyte	chr13	113926842	113927042	GRCh37
Monocyte	chr13	28954544	28954744	GRCh37
Monocyte	chr13	31230742	31230942	GRCh37
Monocyte	chr14	21407138	21407338	GRCh37
Monocyte	chr14	91825349	91825549	GRCh37
Monocyte	chr15	69899472	69899672	GRCh37
Monocyte	chr16	21664900	21665100	GRCh37
Monocyte	chr16	28118275	28118475	GRCh37
Monocyte	chr17	57846444	57846644	GRCh37
Monocyte	chr17	65160808	65161008	GRCh37
Monocyte	chr17	67094037	67094237	GRCh37
Monocyte	chr17	67094868	67095068	GRCh37
Monocyte	chr17	73085071	73085271	GRCh37
Monocyte	chr17	76078793	76078993	GRCh37
Monocyte	chr18	11885315	11885515	GRCh37
Monocyte	chr18	258660	258860	GRCh37
Monocyte	chr19	16777926	16778126	GRCh37
Monocyte	chr19	16958402	16958602	GRCh37
Monocyte	chr19	40869935	40870135	GRCh37
Monocyte	chr19	50530118	50530318	GRCh37
Monocyte	chr19	7449994	7450194	GRCh37
Monocyte	chr2	128036788	128036988	GRCh37
Monocyte	chr2	160965932	160966132	GRCh37
Monocyte	chr2	170834095	170834295	GRCh37
Monocyte	chr2	27011732	27011932	GRCh37
Monocyte	chr20	35550427	35550627	GRCh37
Monocyte	chr20	35633435	35633635	GRCh37
Monocyte	chr20	4767826	4768026	GRCh37
Monocyte	chr21	30603280	30603480	GRCh37
Monocyte	chr22	47135418	47135618	GRCh37
Monocyte	chr3	129208680	129208880	GRCh37
Monocyte	chr3	136345368	136345568	GRCh37
Monocyte	chr3	150631055	150631255	GRCh37
Monocyte	chr3	187476169	187476369	GRCh37
Monocyte	chr3	50664852	50665052	GRCh37
Monocyte	chr3	52961035	52961235	GRCh37
Monocyte	chr4	10062828	10063028	GRCh37
Monocyte	chr4	154544037	154544237	GRCh37
Monocyte	chr4	154556966	154557166	GRCh37
Monocyte	chr4	170361643	170361843	GRCh37
Monocyte	chr4	40100782	40100982	GRCh37
Monocyte	chr4	55053517	55053717	GRCh37
Monocyte	chr5	142156016	142156216	GRCh37
Monocyte	chr5	167573951	167574151	GRCh37
Monocyte	chr5	82453045	82453245	GRCh37
Monocyte	chr6	118902642	118902842	GRCh37
Monocyte	chr6	148945358	148945558	GRCh37
Monocyte	chr6	18166031	18166231	GRCh37
Monocyte	chr6	42406727	42406927	GRCh37
Monocyte	chr6	4688694	4688894	GRCh37
Monocyte	chr6	5028769	5028969	GRCh37
Monocyte	chr6	5698165	5698365	GRCh37
Monocyte	chr6	74164063	74164263	GRCh37
Monocyte	chr7	155085949	155086149	GRCh37
Monocyte	chr7	75990090	75990290	GRCh37
Monocyte	chr7	76866414	76866614	GRCh37
Monocyte	chr8	125727218	125727418	GRCh37
Monocyte	chr8	133857769	133857969	GRCh37
Monocyte	chr8	48343911	48344111	GRCh37
Monocyte	chr8	619770	619970	GRCh37
Monocyte	chr8	623187	623387	GRCh37
Monocyte	chr8	67697257	67697457	GRCh37
Monocyte	chr9	102818877	102819077	GRCh37
Monocyte	chr9	111707079	111707279	GRCh37
Monocyte	chr9	125702058	125702258	GRCh37
Monocyte	chr9	2138598	2138798	GRCh37
Monocyte	chr9	80803012	80803212	GRCh37
Monocyte	chr9	80804505	80804705	GRCh37
Monocyte	chr9	98902012	98902212	GRCh37
Monocyte	chr2	225899314	225899514	GRCh37
Neutrophil	chr1	111762371	111762571	GRCh37
Neutrophil	chr1	111762589	111762789	GRCh37
Neutrophil	chr13	99948921	99949121	GRCh37
Neutrophil	chr2	225822424	225822624	GRCh37
Neutrophil	chr6	143234653	143234853	GRCh37
Neutrophil	chr6	24949411	24949611	GRCh37
Neutrophil	chr9	108147651	108147851	GRCh37
Neutrophil	chr1	10302465	10302665	GRCh37
Neutrophil	chr1	200961348	200961548	GRCh37
Neutrophil	chr1	226079448	226079648	GRCh37
Neutrophil	chr1	22794640	22794840	GRCh37
Neutrophil	chr1	233393516	233393716	GRCh37
Neutrophil	chr1	244568598	244568798	GRCh37
Neutrophil	chr1	28796392	28796592	GRCh37
Neutrophil	chr1	31208349	31208549	GRCh37
Neutrophil	chr1	52965229	52965429	GRCh37
Neutrophil	chr1	7834707	7834907	GRCh37
Neutrophil	chr10	114673456	114673656	GRCh37
Neutrophil	chr10	126618771	126618971	GRCh37
Neutrophil	chr10	70722947	70723147	GRCh37
Neutrophil	chr10	74462403	74462603	GRCh37
Neutrophil	chr10	74573200	74573400	GRCh37
Neutrophil	chr10	75182219	75182419	GRCh37
Neutrophil	chr11	4043647	4043847	GRCh37
Neutrophil	chr11	59373946	59374146	GRCh37
Neutrophil	chr11	68483632	68483832	GRCh37
Neutrophil	chr11	71155505	71155705	GRCh37
Neutrophil	chr12	105614491	105614691	GRCh37
Neutrophil	chr12	113340466	113340666	GRCh37
Neutrophil	chr12	12737547	12737747	GRCh37
Neutrophil	chr12	129304079	129304279	GRCh37
Neutrophil	chr12	32745349	32745549	GRCh37
Neutrophil	chr12	44201695	44201895	GRCh37
Neutrophil	chr12	45664905	45665105	GRCh37
Neutrophil	chr12	51136437	51136637	GRCh37
Neutrophil	chr13	99567296	99567496	GRCh37
Neutrophil	chr15	68475065	68475265	GRCh37
Neutrophil	chr15	99890208	99890408	GRCh37
Neutrophil	chr16	16067257	16067457	GRCh37
Neutrophil	chr16	27771970	27772170	GRCh37
Neutrophil	chr16	85815828	85816028	GRCh37
Neutrophil	chr17	475727	475927	GRCh37
Neutrophil	chr19	3398527	3398727	GRCh37
Neutrophil	chr19	4107672	4107872	GRCh37
Neutrophil	chr19	41781846	41782046	GRCh37
Neutrophil	chr19	5908519	5908719	GRCh37
Neutrophil	chr2	148860912	148861112	GRCh37
Neutrophil	chr2	179399085	179399285	GRCh37
Neutrophil	chr2	233660764	233660964	GRCh37
Neutrophil	chr2	233702428	233702628	GRCh37
Neutrophil	chr2	48448792	48448992	GRCh37
Neutrophil	chr2	64946230	64946430	GRCh37
Neutrophil	chr2	69804588	69804788	GRCh37
Neutrophil	chr2	86743905	86744105	GRCh37
Neutrophil	chr2	97780725	97780925	GRCh37
Neutrophil	chr2	98204696	98204896	GRCh37
Neutrophil	chr20	3811842	3812042	GRCh37
Neutrophil	chr20	49304269	49304469	GRCh37
Neutrophil	chr21	17238627	17238827	GRCh37
Neutrophil	chr21	18962781	18962981	GRCh37
Neutrophil	chr22	39085385	39085585	GRCh37
Neutrophil	chr3	142161032	142161232	GRCh37
Neutrophil	chr3	171456339	171456539	GRCh37
Neutrophil	chr3	188333818	188334018	GRCh37
Neutrophil	chr3	25808814	25809014	GRCh37
Neutrophil	chr3	38322261	38322461	GRCh37
Neutrophil	chr3	45528848	45529048	GRCh37
Neutrophil	chr3	56707784	56707984	GRCh37
Neutrophil	chr3	66515724	66515924	GRCh37
Neutrophil	chr3	71209123	71209323	GRCh37
Neutrophil	chr3	71697395	71697595	GRCh37
Neutrophil	chr4	123148275	123148475	GRCh37
Neutrophil	chr5	112213451	112213651	GRCh37
Neutrophil	chr5	133828509	133828709	GRCh37
Neutrophil	chr5	176967499	176967699	GRCh37
Neutrophil	chr5	40779588	40779788	GRCh37
Neutrophil	chr5	61789736	61789936	GRCh37
Neutrophil	chr5	74733063	74733263	GRCh37
Neutrophil	chr6	110145688	110145888	GRCh37
Neutrophil	chr6	131897881	131898081	GRCh37
Neutrophil	chr6	144997749	144997949	GRCh37
Neutrophil	chr6	37883738	37883938	GRCh37
Neutrophil	chr6	42397514	42397714	GRCh37
Neutrophil	chr6	5826783	5826983	GRCh37
Neutrophil	chr7	148840103	148840303	GRCh37
Neutrophil	chr7	3412607	3412807	GRCh37
Neutrophil	chr7	5382377	5382577	GRCh37
Neutrophil	chr8	126363513	126363713	GRCh37
Neutrophil	chr8	130965737	130965937	GRCh37
Neutrophil	chr8	68258747	68258947	GRCh37
Neutrophil	chr8	73953794	73953994	GRCh37
Neutrophil	chr9	114647151	114647351	GRCh37
Neutrophil	chr9	114657576	114657776	GRCh37
Neutrophil	chr9	114699418	114699618	GRCh37
Neutrophil	chr9	124085172	124085372	GRCh37
Neutrophil	chr9	126408732	126408932	GRCh37
Neutrophil	chr9	95363524	95363724	GRCh37
Neutrophil	chr7	8046847	8047047	GRCh37
Neutrophil	chr22	31862499	31862699	GRCh37
Neutrophil	chr9	85955786	85955986	GRCh37
Natural killer cell	chr1	162379327	162379527	GRCh37
Natural killer cell	chr1	167419535	167419735	GRCh37
Natural killer cell	chr1	221829917	221830117	GRCh37
Natural killer cell	chr1	244318543	244318743	GRCh37
Natural killer cell	chr1	27934228	27934428	GRCh37
Natural killer cell	chr1	42362166	42362366	GRCh37
Natural killer cell	chr1	59841524	59841724	GRCh37
Natural killer cell	chr11	128670965	128671165	GRCh37
Natural killer cell	chr11	70212578	70212778	GRCh37
Natural killer cell	chr12	116508238	116508438	GRCh37
Natural killer cell	chr12	120920274	120920474	GRCh37
Natural killer cell	chr12	129299172	129299372	GRCh37
Natural killer cell	chr12	65110649	65110849	GRCh37
Natural killer cell	chr14	52799102	52799302	GRCh37
Natural killer cell	chr14	72991887	72992087	GRCh37
Natural killer cell	chr14	90388435	90388635	GRCh37
Natural killer cell	chr15	58904026	58904226	GRCh37
Natural killer cell	chr17	20601606	20601806	GRCh37
Natural killer cell	chr17	27936142	27936342	GRCh37
Natural killer cell	chr17	42499550	42499750	GRCh37
Natural killer cell	chr18	29617220	29617420	GRCh37
Natural killer cell	chr18	72542081	72542281	GRCh37
Natural killer cell	chr19	12291460	12291660	GRCh37
Natural killer cell	chr19	12663694	12663894	GRCh37
Natural killer cell	chr19	19638020	19638220	GRCh37
Natural killer cell	chr19	39641632	39641832	GRCh37
Natural killer cell	chr2	103016502	103016702	GRCh37
Natural killer cell	chr2	120692275	120692475	GRCh37
Natural killer cell	chr2	70267365	70267565	GRCh37
Natural killer cell	chr2	8400469	8400669	GRCh37
Natural killer cell	chr2	8420268	8420468	GRCh37
Natural killer cell	chr2	8472727	8472927	GRCh37
Natural killer cell	chr2	8610414	8610614	GRCh37
Natural killer cell	chr20	30257418	30257618	GRCh37
Natural killer cell	chr20	47421960	47422160	GRCh37
Natural killer cell	chr21	32694892	32695092	GRCh37
Natural killer cell	chr21	38608408	38608608	GRCh37
Natural killer cell	chr22	22032235	22032435	GRCh37
Natural killer cell	chr22	47352394	47352594	GRCh37
Natural killer cell	chr3	11651306	11651506	GRCh37
Natural killer cell	chr3	141216551	141216751	GRCh37
Natural killer cell	chr3	152155514	152155714	GRCh37
Natural killer cell	chr3	57662694	57662894	GRCh37
Natural killer cell	chr3	81796658	81796858	GRCh37
Natural killer cell	chr4	143698233	143698433	GRCh37
Natural killer cell	chr4	38120234	38120434	GRCh37
Natural killer cell	chr4	84025959	84026159	GRCh37
Natural killer cell	chr4	84027868	84028068	GRCh37
Natural killer cell	chr4	96894160	96894360	GRCh37
Natural killer cell	chr5	131444814	131445014	GRCh37
Natural killer cell	chr5	80080926	80081126	GRCh37
Natural killer cell	chr6	13446764	13446964	GRCh37
Natural killer cell	chr6	163969875	163970075	GRCh37
Natural killer cell	chr6	170370454	170370654	GRCh37
Natural killer cell	chr6	25005376	25005576	GRCh37
Natural killer cell	chr6	37812142	37812342	GRCh37
Natural killer cell	chr7	125135873	125136073	GRCh37
Natural killer cell	chr7	129278099	129278299	GRCh37
Natural killer cell	chr7	132514323	132514523	GRCh37
Natural killer cell	chr7	2402357	2402557	GRCh37
Natural killer cell	chr7	77189306	77189506	GRCh37
Natural killer cell	chr7	77193383	77193583	GRCh37
Natural killer cell	chr7	77196300	77196500	GRCh37
Natural killer cell	chr8	37645626	37645826	GRCh37
Natural killer cell	chr8	48265294	48265494	GRCh37
Natural killer cell	chr8	48289436	48289636	GRCh37
Natural killer cell	chr8	48624511	48624711	GRCh37
Natural killer cell	chr9	127575025	127575225	GRCh37
Natural killer cell	chr22	47352510	47352710	GRCh37
Natural killer cell	chr18	46945205	46945405	GRCh37
Natural killer cell	chr2	238939019	238939219	GRCh37
Natural killer cell	chr7	148471746	148471946	GRCh37
Natural killer cell	chr17	28025461	28025661	GRCh37
Natural killer cell	chr3	32945701	32945901	GRCh37
Natural killer cell	chr20	6644408	6644608	GRCh37
Natural killer cell	chr11	78006156	78006356	GRCh37
Natural killer cell	chr7	2402503	2402703	GRCh37
Natural killer cell	chr7	108133218	108133418	GRCh37
Natural killer cell	chr3	107311091	107311291	GRCh37
Natural killer cell	chr12	116659033	116659233	GRCh37
Natural killer cell	chr19	1168212	1168412	GRCh37
Natural killer cell	chr13	52199184	52199384	GRCh37
Natural killer cell	chr17	55652592	55652792	GRCh37
Natural killer cell	chr10	7231918	7232118	GRCh37
Natural killer cell	chr10	134499880	134500080	GRCh37
Natural killer cell	chr9	140622028	140622228	GRCh37
Natural killer cell	chr7	115892421	115892621	GRCh37
Natural killer cell	chr22	40524444	40524644	GRCh37
Natural killer cell	chr7	127396100	127396300	GRCh37
Natural killer cell	chr12	116508374	116508574	GRCh37
Natural killer cell	chr2	232393834	232394034	GRCh37
Natural killer cell	chr20	19455606	19455806	GRCh37
Natural killer cell	chr7	94658355	94658555	GRCh37
Natural killer cell	chr17	9381875	9382075	GRCh37
Natural killer cell	chr13	66738824	66739024	GRCh37
Natural killer cell	chr4	84023357	84023557	GRCh37
Natural killer cell	chr8	142282335	142282535	GRCh37
Natural killer cell	chr16	580162	580362	GRCh37
Natural killer cell	chr7	139520232	139520432	GRCh37
Natural killer cell	chr22	37540030	37540230	GRCh37

## Sheet: Immune_cells_WGBS_CpGs
Rank	Cell_type	Chromosome	Locus	Genome_build
1	B-cell	chr17	65431313	GRCh37
2	B-cell	chr13	111328092	GRCh37
3	B-cell	chr17	74419900	GRCh37
4	B-cell	chr13	41931171	GRCh37
5	B-cell	chr17	3720252	GRCh37
6	B-cell	chr17	65431211	GRCh37
7	B-cell	chr6	74132091	GRCh37
8	B-cell	chr17	45308410	GRCh37
9	B-cell	chr17	74429986	GRCh37
10	B-cell	chr9	136766006	GRCh37
11	B-cell	chr3	42082239	GRCh37
12	B-cell	chr16	3605633	GRCh37
13	B-cell	chr2	37425257	GRCh37
14	B-cell	chr7	2461134	GRCh37
15	B-cell	chr17	74429984	GRCh37
16	B-cell	chr1	111743271	GRCh37
17	B-cell	chr15	41584077	GRCh37
18	B-cell	chr7	2948003	GRCh37
19	B-cell	chr7	26370838	GRCh37
20	B-cell	chr1	15890591	GRCh37
21	B-cell	chr12	93204476	GRCh37
22	B-cell	chr11	65885377	GRCh37
23	B-cell	chr16	15101252	GRCh37
24	B-cell	chr17	65431468	GRCh37
25	B-cell	chr17	67573395	GRCh37
26	B-cell	chr8	19706466	GRCh37
27	B-cell	chr18	33640540	GRCh37
28	B-cell	chr9	91155376	GRCh37
29	B-cell	chr6	107084298	GRCh37
30	B-cell	chr22	23377443	GRCh37
31	B-cell	chr14	89653143	GRCh37
32	B-cell	chr12	121565846	GRCh37
33	B-cell	chr5	171422139	GRCh37
34	B-cell	chr2	120991666	GRCh37
35	B-cell	chr2	136997350	GRCh37
36	B-cell	chr15	52443221	GRCh37
37	B-cell	chr2	234111108	GRCh37
38	B-cell	chr2	37425259	GRCh37
39	B-cell	chr5	64364477	GRCh37
40	B-cell	chr2	152628485	GRCh37
41	B-cell	chr12	56602029	GRCh37
42	B-cell	chr16	24031225	GRCh37
43	B-cell	chr18	60844680	GRCh37
44	B-cell	chr1	27810107	GRCh37
45	B-cell	chr22	39468355	GRCh37
46	B-cell	chr4	185391784	GRCh37
47	B-cell	chr2	233822778	GRCh37
48	B-cell	chr16	89441487	GRCh37
49	B-cell	chr8	100335275	GRCh37
50	B-cell	chr4	84358692	GRCh37
51	B-cell	chr22	42933040	GRCh37
52	B-cell	chr3	121512467	GRCh37
53	B-cell	chr11	129817717	GRCh37
54	B-cell	chr17	28099324	GRCh37
55	B-cell	chr10	98998066	GRCh37
56	B-cell	chr11	95807158	GRCh37
57	B-cell	chr3	197386819	GRCh37
58	B-cell	chr10	104941723	GRCh37
59	B-cell	chr8	124526951	GRCh37
60	B-cell	chr12	122889823	GRCh37
61	B-cell	chr15	57390151	GRCh37
62	B-cell	chr15	41584242	GRCh37
63	B-cell	chr10	82247803	GRCh37
64	B-cell	chr17	67573474	GRCh37
65	B-cell	chr10	82243727	GRCh37
66	B-cell	chr15	23032478	GRCh37
67	B-cell	chr17	16949142	GRCh37
68	B-cell	chr20	42314009	GRCh37
69	B-cell	chr10	7385318	GRCh37
70	B-cell	chr2	89159180	GRCh37
71	B-cell	chr4	2698639	GRCh37
72	B-cell	chr8	60197574	GRCh37
73	B-cell	chr5	153618987	GRCh37
74	B-cell	chr6	33666513	GRCh37
75	B-cell	chr3	67701001	GRCh37
76	B-cell	chr7	2461126	GRCh37
77	B-cell	chr15	66196329	GRCh37
78	B-cell	chr1	174841801	GRCh37
79	B-cell	chr14	61379805	GRCh37
80	B-cell	chr14	96131043	GRCh37
81	B-cell	chr15	23032476	GRCh37
82	B-cell	chr3	186715450	GRCh37
83	B-cell	chr22	18487760	GRCh37
84	B-cell	chr14	76426904	GRCh37
85	B-cell	chr1	224332910	GRCh37
86	B-cell	chr10	30709449	GRCh37
87	B-cell	chr7	104572813	GRCh37
88	B-cell	chr22	17910836	GRCh37
89	B-cell	chr2	61066311	GRCh37
90	B-cell	chr7	27657306	GRCh37
91	B-cell	chr10	12120476	GRCh37
92	B-cell	chr22	20760976	GRCh37
93	B-cell	chr5	112260794	GRCh37
94	B-cell	chr2	65144013	GRCh37
95	B-cell	chr10	26191325	GRCh37
96	B-cell	chr6	35260365	GRCh37
97	B-cell	chr9	37324327	GRCh37
98	B-cell	chr9	37204098	GRCh37
99	B-cell	chr22	42935074	GRCh37
100	B-cell	chr16	22229682	GRCh37
101	B-cell	chr8	38134858	GRCh37
102	B-cell	chr22	17910834	GRCh37
103	B-cell	chr10	70542124	GRCh37
104	B-cell	chr3	30761269	GRCh37
105	B-cell	chr22	41876318	GRCh37
106	B-cell	chr4	74542991	GRCh37
107	B-cell	chr10	1467229	GRCh37
108	B-cell	chr20	33476870	GRCh37
109	B-cell	chr22	42947678	GRCh37
110	B-cell	chr12	94614846	GRCh37
111	B-cell	chr7	76834968	GRCh37
112	B-cell	chr7	149240274	GRCh37
113	B-cell	chr6	37346269	GRCh37
114	B-cell	chr17	63028340	GRCh37
115	B-cell	chr17	1377809	GRCh37
116	B-cell	chr17	28099332	GRCh37
117	B-cell	chr2	42481459	GRCh37
118	B-cell	chr10	98998040	GRCh37
119	B-cell	chr6	14255197	GRCh37
120	B-cell	chr17	67573472	GRCh37
121	B-cell	chr7	403724	GRCh37
122	B-cell	chr20	32161348	GRCh37
123	B-cell	chr19	38465792	GRCh37
124	B-cell	chr5	118364391	GRCh37
125	B-cell	chr6	16104971	GRCh37
126	B-cell	chr16	58472839	GRCh37
127	B-cell	chr11	94328552	GRCh37
128	B-cell	chr1	155376906	GRCh37
129	B-cell	chr3	186734330	GRCh37
130	B-cell	chr10	11641858	GRCh37
131	B-cell	chr3	187954240	GRCh37
132	B-cell	chr18	3546252	GRCh37
133	B-cell	chr18	77256330	GRCh37
134	B-cell	chr20	42311267	GRCh37
135	B-cell	chr15	79371567	GRCh37
136	B-cell	chr22	22135982	GRCh37
137	B-cell	chr19	38469926	GRCh37
138	B-cell	chr18	21575352	GRCh37
139	B-cell	chr5	64357643	GRCh37
140	B-cell	chr17	56588031	GRCh37
141	B-cell	chr19	44089448	GRCh37
142	B-cell	chr6	150599876	GRCh37
143	B-cell	chr20	3791941	GRCh37
144	B-cell	chr11	2415623	GRCh37
145	B-cell	chr7	129535672	GRCh37
146	B-cell	chr11	116787773	GRCh37
147	B-cell	chr19	1265309	GRCh37
148	B-cell	chr15	50777601	GRCh37
149	B-cell	chr6	37523102	GRCh37
150	B-cell	chr19	38442409	GRCh37
151	B-cell	chr22	47164947	GRCh37
152	B-cell	chr16	3605656	GRCh37
153	B-cell	chr5	61621439	GRCh37
154	B-cell	chr18	77256206	GRCh37
155	B-cell	chr17	64770730	GRCh37
156	B-cell	chr5	49930577	GRCh37
157	B-cell	chr14	77585587	GRCh37
158	B-cell	chr5	79439475	GRCh37
159	B-cell	chr2	135037975	GRCh37
160	B-cell	chr20	47370910	GRCh37
161	B-cell	chr11	19981356	GRCh37
162	B-cell	chr19	2623810	GRCh37
163	B-cell	chr16	81951015	GRCh37
164	B-cell	chr2	61070296	GRCh37
165	B-cell	chr4	84143437	GRCh37
166	B-cell	chr6	150029411	GRCh37
167	B-cell	chr7	2947948	GRCh37
168	B-cell	chr9	115086837	GRCh37
169	B-cell	chr22	23550956	GRCh37
170	B-cell	chr15	98707142	GRCh37
171	B-cell	chr1	180394036	GRCh37
172	B-cell	chr10	5860870	GRCh37
173	B-cell	chr9	34213423	GRCh37
174	B-cell	chr4	39362286	GRCh37
175	B-cell	chr2	242313534	GRCh37
176	B-cell	chr18	77257384	GRCh37
177	B-cell	chr21	43817727	GRCh37
178	B-cell	chr13	43562670	GRCh37
179	B-cell	chr10	89872318	GRCh37
180	B-cell	chr4	16235349	GRCh37
181	B-cell	chr6	155742702	GRCh37
182	B-cell	chr22	38547032	GRCh37
183	B-cell	chr17	62806700	GRCh37
184	B-cell	chr19	38413763	GRCh37
185	B-cell	chr5	65358184	GRCh37
186	B-cell	chr16	58765151	GRCh37
187	B-cell	chr16	71762004	GRCh37
188	B-cell	chr17	42928107	GRCh37
189	B-cell	chr7	98668081	GRCh37
190	B-cell	chr22	21101467	GRCh37
191	B-cell	chr11	2415319	GRCh37
192	B-cell	chr10	11447010	GRCh37
193	B-cell	chr2	8143131	GRCh37
194	B-cell	chr3	169696462	GRCh37
195	B-cell	chr11	64582426	GRCh37
196	B-cell	chr1	231094329	GRCh37
197	B-cell	chr3	195663147	GRCh37
198	B-cell	chr14	103383296	GRCh37
199	B-cell	chr22	23550996	GRCh37
200	B-cell	chr15	64381551	GRCh37
201	B-cell	chr9	116818318	GRCh37
202	B-cell	chr12	4277416	GRCh37
203	B-cell	chr13	24419904	GRCh37
204	B-cell	chr16	29024597	GRCh37
205	B-cell	chr10	12387982	GRCh37
206	B-cell	chr1	26944908	GRCh37
207	B-cell	chr22	42932881	GRCh37
208	B-cell	chr1	33416355	GRCh37
209	B-cell	chr17	65431456	GRCh37
210	B-cell	chr2	127465857	GRCh37
211	B-cell	chr11	68581300	GRCh37
212	B-cell	chr2	89159205	GRCh37
213	B-cell	chr9	126969025	GRCh37
214	B-cell	chr5	1525987	GRCh37
215	B-cell	chr15	26048379	GRCh37
216	B-cell	chr1	27984834	GRCh37
217	B-cell	chr7	47607109	GRCh37
218	B-cell	chr9	37324325	GRCh37
219	B-cell	chr6	13305398	GRCh37
220	B-cell	chr4	71546370	GRCh37
221	B-cell	chr11	75535997	GRCh37
222	B-cell	chr2	234174696	GRCh37
223	B-cell	chr14	95953848	GRCh37
224	B-cell	chr2	98552954	GRCh37
225	B-cell	chr14	73882394	GRCh37
226	B-cell	chr10	63864884	GRCh37
227	B-cell	chr5	49601739	GRCh37
228	B-cell	chr2	47271285	GRCh37
229	B-cell	chr10	76400133	GRCh37
230	B-cell	chr7	36982835	GRCh37
231	B-cell	chr16	79047799	GRCh37
232	B-cell	chr3	170813199	GRCh37
233	B-cell	chr22	46829667	GRCh37
234	B-cell	chr20	40302355	GRCh37
235	B-cell	chr2	69060509	GRCh37
236	B-cell	chr2	7190444	GRCh37
237	B-cell	chr18	3400458	GRCh37
238	B-cell	chr7	151422236	GRCh37
239	B-cell	chr16	88078371	GRCh37
240	B-cell	chr19	13238444	GRCh37
241	B-cell	chr17	72747804	GRCh37
242	B-cell	chr15	70491349	GRCh37
243	B-cell	chr14	95989732	GRCh37
244	B-cell	chr2	30708148	GRCh37
245	B-cell	chr15	31313396	GRCh37
246	B-cell	chr10	4558078	GRCh37
247	B-cell	chr22	20017299	GRCh37
248	B-cell	chr1	201689184	GRCh37
249	B-cell	chr5	176718219	GRCh37
250	B-cell	chr12	109193982	GRCh37
251	B-cell	chr8	56752792	GRCh37
252	B-cell	chr19	49380467	GRCh37
253	B-cell	chr13	41931181	GRCh37
254	B-cell	chr9	37189444	GRCh37
255	B-cell	chr6	53114046	GRCh37
256	B-cell	chr14	73851782	GRCh37
257	B-cell	chr9	134053118	GRCh37
258	B-cell	chr10	112604941	GRCh37
259	B-cell	chr13	31293543	GRCh37
260	B-cell	chr19	2627104	GRCh37
261	B-cell	chr17	41178625	GRCh37
262	B-cell	chr10	82247648	GRCh37
263	B-cell	chr7	151422313	GRCh37
264	B-cell	chr2	25786833	GRCh37
265	B-cell	chr19	19960082	GRCh37
266	B-cell	chr5	156932074	GRCh37
267	B-cell	chr7	102082588	GRCh37
268	B-cell	chr2	45938888	GRCh37
269	B-cell	chr16	30451174	GRCh37
270	B-cell	chr19	9435681	GRCh37
271	B-cell	chr6	84880049	GRCh37
272	B-cell	chr2	47928313	GRCh37
273	B-cell	chr12	56854266	GRCh37
274	B-cell	chr1	200275904	GRCh37
275	B-cell	chr9	135763734	GRCh37
276	B-cell	chr10	43105792	GRCh37
277	B-cell	chr7	2948057	GRCh37
278	B-cell	chr11	61123512	GRCh37
279	B-cell	chr7	66380095	GRCh37
280	B-cell	chr8	23279088	GRCh37
281	B-cell	chr1	12258050	GRCh37
282	B-cell	chr1	243451724	GRCh37
283	B-cell	chr6	35477247	GRCh37
284	B-cell	chr10	12120524	GRCh37
285	B-cell	chr7	97849167	GRCh37
286	B-cell	chr9	117378516	GRCh37
287	B-cell	chr16	58453754	GRCh37
288	B-cell	chr9	140653571	GRCh37
289	B-cell	chr19	10705272	GRCh37
290	B-cell	chr17	26399508	GRCh37
291	B-cell	chr6	137753766	GRCh37
292	B-cell	chr6	43545691	GRCh37
293	B-cell	chr6	155135464	GRCh37
294	B-cell	chr19	16552199	GRCh37
295	B-cell	chr12	92543476	GRCh37
296	B-cell	chr6	53037120	GRCh37
297	B-cell	chr19	2694727	GRCh37
298	B-cell	chr3	127401006	GRCh37
299	B-cell	chr10	65020380	GRCh37
300	B-cell	chr20	18639038	GRCh37
301	B-cell	chr22	50325283	GRCh37
302	B-cell	chr22	21101540	GRCh37
303	B-cell	chr6	156484866	GRCh37
304	B-cell	chr22	21971359	GRCh37
305	B-cell	chr22	24095312	GRCh37
306	B-cell	chr17	3493653	GRCh37
307	B-cell	chr21	46499023	GRCh37
308	B-cell	chr16	27309622	GRCh37
309	B-cell	chr9	115537170	GRCh37
310	B-cell	chr1	67137114	GRCh37
311	B-cell	chr7	45090129	GRCh37
312	B-cell	chr19	1265302	GRCh37
313	B-cell	chr3	12923577	GRCh37
314	B-cell	chr3	177036637	GRCh37
315	B-cell	chr20	46043053	GRCh37
316	B-cell	chr5	176550989	GRCh37
317	B-cell	chr12	109218178	GRCh37
318	B-cell	chr13	22143191	GRCh37
319	B-cell	chr8	125808560	GRCh37
320	B-cell	chr2	30808147	GRCh37
321	B-cell	chr19	6671373	GRCh37
322	B-cell	chr10	26191323	GRCh37
323	B-cell	chr10	74891311	GRCh37
324	B-cell	chr2	102016598	GRCh37
325	B-cell	chr4	2697709	GRCh37
326	B-cell	chr7	44095312	GRCh37
327	B-cell	chr19	1313971	GRCh37
328	B-cell	chr6	43348792	GRCh37
329	B-cell	chr20	35473198	GRCh37
330	B-cell	chr12	112337478	GRCh37
331	B-cell	chr8	19706480	GRCh37
332	B-cell	chr15	81581025	GRCh37
333	B-cell	chr15	31214142	GRCh37
334	B-cell	chr20	60776714	GRCh37
335	B-cell	chr19	16552296	GRCh37
336	B-cell	chr2	37425289	GRCh37
337	B-cell	chr3	16472704	GRCh37
338	B-cell	chr19	44089421	GRCh37
339	B-cell	chr17	27215973	GRCh37
340	B-cell	chr12	56602002	GRCh37
341	B-cell	chr22	46829251	GRCh37
342	B-cell	chr2	135037991	GRCh37
343	B-cell	chr12	118542741	GRCh37
344	B-cell	chr18	9066930	GRCh37
345	B-cell	chr5	159524869	GRCh37
346	B-cell	chr5	142664718	GRCh37
347	B-cell	chr11	116787477	GRCh37
348	B-cell	chr2	223492763	GRCh37
349	B-cell	chr5	64275502	GRCh37
350	B-cell	chr2	44513827	GRCh37
351	B-cell	chr5	71597700	GRCh37
352	B-cell	chr20	60776635	GRCh37
353	B-cell	chr14	103365344	GRCh37
354	B-cell	chr1	46836924	GRCh37
355	B-cell	chr11	121293801	GRCh37
356	B-cell	chr18	43430315	GRCh37
357	B-cell	chr14	74607364	GRCh37
358	B-cell	chr9	108081028	GRCh37
359	B-cell	chr4	2849079	GRCh37
360	B-cell	chr17	1967300	GRCh37
361	B-cell	chr6	33666520	GRCh37
362	B-cell	chr10	133598640	GRCh37
363	B-cell	chr6	108579618	GRCh37
364	B-cell	chr16	75107627	GRCh37
365	B-cell	chr7	129535670	GRCh37
366	B-cell	chr2	233427188	GRCh37
367	B-cell	chr2	169578710	GRCh37
368	B-cell	chr17	78820280	GRCh37
369	B-cell	chr9	131444897	GRCh37
370	B-cell	chr7	2171169	GRCh37
371	B-cell	chr7	1144966	GRCh37
372	B-cell	chr22	23551103	GRCh37
373	B-cell	chr3	177066459	GRCh37
374	B-cell	chr14	105725090	GRCh37
375	B-cell	chr14	39508079	GRCh37
376	B-cell	chr4	42687085	GRCh37
377	B-cell	chr19	4977410	GRCh37
378	B-cell	chr6	25975323	GRCh37
379	B-cell	chr3	4868594	GRCh37
380	B-cell	chr12	8892914	GRCh37
381	B-cell	chr9	15426141	GRCh37
382	B-cell	chr6	25104087	GRCh37
383	B-cell	chr3	9794625	GRCh37
384	B-cell	chr15	64075988	GRCh37
385	B-cell	chr16	27309665	GRCh37
386	B-cell	chr20	60776958	GRCh37
387	B-cell	chr14	73771531	GRCh37
388	B-cell	chr6	135427150	GRCh37
389	B-cell	chr9	132147792	GRCh37
390	B-cell	chr17	935785	GRCh37
391	B-cell	chr11	75548328	GRCh37
392	B-cell	chr2	207326045	GRCh37
393	B-cell	chr9	91155378	GRCh37
394	B-cell	chr12	105184098	GRCh37
395	B-cell	chr22	42267980	GRCh37
396	B-cell	chr4	39627122	GRCh37
397	B-cell	chr8	29991678	GRCh37
398	B-cell	chr1	32250920	GRCh37
399	B-cell	chr3	169950464	GRCh37
400	B-cell	chr8	22387481	GRCh37
401	B-cell	chr6	218437	GRCh37
402	B-cell	chr22	42932931	GRCh37
403	B-cell	chr13	44720981	GRCh37
404	B-cell	chr3	195534854	GRCh37
405	B-cell	chr22	41819016	GRCh37
406	B-cell	chr13	107099684	GRCh37
407	B-cell	chr20	61286761	GRCh37
408	B-cell	chr1	46201364	GRCh37
409	B-cell	chr7	5270862	GRCh37
410	B-cell	chr16	10354288	GRCh37
411	B-cell	chr1	220427326	GRCh37
412	B-cell	chr19	11302640	GRCh37
413	B-cell	chr14	103365267	GRCh37
414	B-cell	chr21	42602143	GRCh37
415	B-cell	chr15	44082232	GRCh37
416	B-cell	chr7	144522339	GRCh37
417	B-cell	chr5	141819553	GRCh37
418	B-cell	chr15	70580178	GRCh37
419	B-cell	chr7	2177979	GRCh37
420	B-cell	chr1	32774188	GRCh37
421	B-cell	chr1	27799773	GRCh37
422	B-cell	chr1	45878564	GRCh37
423	B-cell	chr12	122909893	GRCh37
424	B-cell	chr22	21101513	GRCh37
425	B-cell	chr1	224373974	GRCh37
426	B-cell	chr6	107131176	GRCh37
427	B-cell	chr16	21658137	GRCh37
428	B-cell	chr15	70611792	GRCh37
429	B-cell	chr12	42768304	GRCh37
430	B-cell	chr12	111156414	GRCh37
431	B-cell	chr1	9762868	GRCh37
432	B-cell	chr2	62827993	GRCh37
433	B-cell	chr2	46142849	GRCh37
434	B-cell	chr16	58765147	GRCh37
435	B-cell	chr16	10354286	GRCh37
436	B-cell	chr16	29359200	GRCh37
437	B-cell	chr19	38490050	GRCh37
438	B-cell	chr9	37204087	GRCh37
439	B-cell	chr10	102025340	GRCh37
440	B-cell	chr3	141243577	GRCh37
441	B-cell	chr7	2020501	GRCh37
442	B-cell	chr3	42169008	GRCh37
443	B-cell	chr6	108579621	GRCh37
444	B-cell	chr5	71597697	GRCh37
445	B-cell	chr6	89341824	GRCh37
446	B-cell	chr11	67413102	GRCh37
447	B-cell	chr18	9066932	GRCh37
448	B-cell	chr16	4802776	GRCh37
449	B-cell	chr22	22136124	GRCh37
450	B-cell	chr7	47968222	GRCh37
451	B-cell	chr18	60844678	GRCh37
452	B-cell	chr16	27311152	GRCh37
453	B-cell	chr2	69014989	GRCh37
454	B-cell	chr1	236588474	GRCh37
455	B-cell	chr17	71608505	GRCh37
456	B-cell	chr1	97796936	GRCh37
457	B-cell	chr19	1648152	GRCh37
458	B-cell	chr20	35962477	GRCh37
459	B-cell	chr7	101337020	GRCh37
460	B-cell	chr13	46951663	GRCh37
461	B-cell	chr2	242920206	GRCh37
462	B-cell	chr8	96154634	GRCh37
463	B-cell	chr9	128409835	GRCh37
464	B-cell	chr11	68581295	GRCh37
465	B-cell	chr22	42285198	GRCh37
466	B-cell	chrX	39687466	GRCh37
467	B-cell	chr7	151422239	GRCh37
468	B-cell	chr17	65820187	GRCh37
469	B-cell	chr2	97712884	GRCh37
470	B-cell	chr7	1145319	GRCh37
471	B-cell	chr20	4975321	GRCh37
472	B-cell	chr1	45877249	GRCh37
473	B-cell	chr6	156614810	GRCh37
474	B-cell	chr20	33476876	GRCh37
475	B-cell	chr4	185317540	GRCh37
476	B-cell	chr22	22465023	GRCh37
477	B-cell	chr4	40302413	GRCh37
478	B-cell	chr19	9267864	GRCh37
479	B-cell	chr21	43342247	GRCh37
480	B-cell	chr17	46460222	GRCh37
481	B-cell	chr15	94528522	GRCh37
482	B-cell	chr17	40894997	GRCh37
483	B-cell	chr1	35257858	GRCh37
484	B-cell	chr8	48110538	GRCh37
485	B-cell	chr12	56772523	GRCh37
486	B-cell	chr22	42932988	GRCh37
487	B-cell	chr8	19528328	GRCh37
488	B-cell	chr10	90108795	GRCh37
489	B-cell	chr4	186141127	GRCh37
490	B-cell	chr17	13847921	GRCh37
491	B-cell	chr19	15364507	GRCh37
492	B-cell	chr15	64381697	GRCh37
493	B-cell	chr15	29621498	GRCh37
494	B-cell	chr6	91254404	GRCh37
495	B-cell	chr14	95989911	GRCh37
496	B-cell	chr17	18803035	GRCh37
497	B-cell	chr9	37337555	GRCh37
498	B-cell	chr5	145629896	GRCh37
499	B-cell	chr17	25949099	GRCh37
500	B-cell	chr3	194417207	GRCh37
1	CD4+ T-cell	chr1	234544825	GRCh37
2	CD4+ T-cell	chr1	234544646	GRCh37
3	CD4+ T-cell	chr2	59689742	GRCh37
4	CD4+ T-cell	chr1	234545006	GRCh37
5	CD4+ T-cell	chr12	6900351	GRCh37
6	CD4+ T-cell	chr22	30001217	GRCh37
7	CD4+ T-cell	chr1	234544834	GRCh37
8	CD4+ T-cell	chr1	234544671	GRCh37
9	CD4+ T-cell	chr3	35749523	GRCh37
10	CD4+ T-cell	chr1	92057751	GRCh37
11	CD4+ T-cell	chr1	234545133	GRCh37
12	CD4+ T-cell	chr1	234544649	GRCh37
13	CD4+ T-cell	chr19	43941659	GRCh37
14	CD4+ T-cell	chrX	135734588	GRCh37
15	CD4+ T-cell	chr1	234544390	GRCh37
16	CD4+ T-cell	chr17	3673907	GRCh37
17	CD4+ T-cell	chr1	234544316	GRCh37
18	CD4+ T-cell	chr22	30001215	GRCh37
19	CD4+ T-cell	chr22	31981109	GRCh37
20	CD4+ T-cell	chr12	6900511	GRCh37
21	CD4+ T-cell	chr11	60803076	GRCh37
22	CD4+ T-cell	chr2	109235867	GRCh37
23	CD4+ T-cell	chr1	234544309	GRCh37
24	CD4+ T-cell	chr15	58541986	GRCh37
25	CD4+ T-cell	chr13	99221157	GRCh37
26	CD4+ T-cell	chrX	135741391	GRCh37
27	CD4+ T-cell	chr5	134661405	GRCh37
28	CD4+ T-cell	chr17	78786251	GRCh37
29	CD4+ T-cell	chr11	60751909	GRCh37
30	CD4+ T-cell	chr16	89885503	GRCh37
31	CD4+ T-cell	chr22	43321825	GRCh37
32	CD4+ T-cell	chr16	50825538	GRCh37
33	CD4+ T-cell	chr17	16809850	GRCh37
34	CD4+ T-cell	chr10	35301020	GRCh37
35	CD4+ T-cell	chr2	129292001	GRCh37
36	CD4+ T-cell	chr3	129296867	GRCh37
37	CD4+ T-cell	chr3	19031403	GRCh37
38	CD4+ T-cell	chr1	234545087	GRCh37
39	CD4+ T-cell	chr2	12636418	GRCh37
40	CD4+ T-cell	chr12	24459113	GRCh37
41	CD4+ T-cell	chr1	92057818	GRCh37
42	CD4+ T-cell	chr1	43401136	GRCh37
43	CD4+ T-cell	chr12	90624448	GRCh37
44	CD4+ T-cell	chrX	135731708	GRCh37
45	CD4+ T-cell	chr17	3674054	GRCh37
46	CD4+ T-cell	chr17	37174601	GRCh37
47	CD4+ T-cell	chr1	92057807	GRCh37
48	CD4+ T-cell	chr2	129292005	GRCh37
49	CD4+ T-cell	chr8	19250897	GRCh37
50	CD4+ T-cell	chr12	111099700	GRCh37
51	CD4+ T-cell	chr7	77543833	GRCh37
52	CD4+ T-cell	chr21	32555300	GRCh37
53	CD4+ T-cell	chr11	60803049	GRCh37
54	CD4+ T-cell	chr3	19031388	GRCh37
55	CD4+ T-cell	chr8	119351875	GRCh37
56	CD4+ T-cell	chr11	60884608	GRCh37
57	CD4+ T-cell	chr11	60803092	GRCh37
58	CD4+ T-cell	chrX	135739218	GRCh37
59	CD4+ T-cell	chr2	12197671	GRCh37
60	CD4+ T-cell	chr14	89888977	GRCh37
61	CD4+ T-cell	chr14	97874907	GRCh37
62	CD4+ T-cell	chr4	143477988	GRCh37
63	CD4+ T-cell	chr2	12198008	GRCh37
64	CD4+ T-cell	chr8	42011664	GRCh37
65	CD4+ T-cell	chr7	137931487	GRCh37
66	CD4+ T-cell	chr3	33049548	GRCh37
67	CD4+ T-cell	chr2	12197993	GRCh37
68	CD4+ T-cell	chr12	111099188	GRCh37
69	CD4+ T-cell	chr17	37174583	GRCh37
70	CD4+ T-cell	chr14	102226236	GRCh37
71	CD4+ T-cell	chr2	70438455	GRCh37
72	CD4+ T-cell	chr1	117529551	GRCh37
73	CD4+ T-cell	chr2	129292007	GRCh37
74	CD4+ T-cell	chr3	129930971	GRCh37
75	CD4+ T-cell	chr2	112940729	GRCh37
76	CD4+ T-cell	chr10	114979155	GRCh37
77	CD4+ T-cell	chr6	169884375	GRCh37
78	CD4+ T-cell	chr6	15732934	GRCh37
79	CD4+ T-cell	chr1	117529553	GRCh37
80	CD4+ T-cell	chr14	92997905	GRCh37
81	CD4+ T-cell	chr12	4169174	GRCh37
82	CD4+ T-cell	chr3	129297053	GRCh37
83	CD4+ T-cell	chrX	135734950	GRCh37
84	CD4+ T-cell	chrX	135739322	GRCh37
85	CD4+ T-cell	chr11	60884546	GRCh37
86	CD4+ T-cell	chr1	15660250	GRCh37
87	CD4+ T-cell	chr17	78786175	GRCh37
88	CD4+ T-cell	chr12	122101784	GRCh37
89	CD4+ T-cell	chr12	94567667	GRCh37
90	CD4+ T-cell	chr2	204810241	GRCh37
91	CD4+ T-cell	chr17	16809827	GRCh37
92	CD4+ T-cell	chr11	2555164	GRCh37
93	CD4+ T-cell	chr13	28304308	GRCh37
94	CD4+ T-cell	chr15	91863311	GRCh37
95	CD4+ T-cell	chr8	97293905	GRCh37
96	CD4+ T-cell	chr8	119351794	GRCh37
97	CD4+ T-cell	chr4	48502165	GRCh37
98	CD4+ T-cell	chr11	45104900	GRCh37
99	CD4+ T-cell	chr1	232259905	GRCh37
100	CD4+ T-cell	chr7	123365255	GRCh37
101	CD4+ T-cell	chr8	86508066	GRCh37
102	CD4+ T-cell	chr2	204718441	GRCh37
103	CD4+ T-cell	chr8	42015560	GRCh37
104	CD4+ T-cell	chr1	154985600	GRCh37
105	CD4+ T-cell	chr14	97360608	GRCh37
106	CD4+ T-cell	chr12	110820735	GRCh37
107	CD4+ T-cell	chr11	67652096	GRCh37
108	CD4+ T-cell	chr20	56965514	GRCh37
109	CD4+ T-cell	chr11	122588374	GRCh37
110	CD4+ T-cell	chr12	4167027	GRCh37
111	CD4+ T-cell	chr3	33049528	GRCh37
112	CD4+ T-cell	chr12	10548484	GRCh37
113	CD4+ T-cell	chr1	117529557	GRCh37
114	CD4+ T-cell	chr2	204808180	GRCh37
115	CD4+ T-cell	chr2	37470829	GRCh37
116	CD4+ T-cell	chr14	102226225	GRCh37
117	CD4+ T-cell	chr17	73086012	GRCh37
118	CD4+ T-cell	chr16	57682159	GRCh37
119	CD4+ T-cell	chr2	86695894	GRCh37
120	CD4+ T-cell	chr5	177542603	GRCh37
121	CD4+ T-cell	chr13	75898520	GRCh37
122	CD4+ T-cell	chr1	245499900	GRCh37
123	CD4+ T-cell	chr20	31537956	GRCh37
124	CD4+ T-cell	chr6	15299954	GRCh37
125	CD4+ T-cell	chr6	15300114	GRCh37
126	CD4+ T-cell	chr10	11131188	GRCh37
127	CD4+ T-cell	chr1	3665082	GRCh37
128	CD4+ T-cell	chr12	124405676	GRCh37
129	CD4+ T-cell	chr16	57682182	GRCh37
130	CD4+ T-cell	chr17	9930194	GRCh37
131	CD4+ T-cell	chr22	43321833	GRCh37
132	CD4+ T-cell	chr7	38437541	GRCh37
133	CD4+ T-cell	chr1	158769816	GRCh37
134	CD4+ T-cell	chr2	204808688	GRCh37
135	CD4+ T-cell	chr22	31980489	GRCh37
136	CD4+ T-cell	chr9	136512640	GRCh37
137	CD4+ T-cell	chr6	152379053	GRCh37
138	CD4+ T-cell	chrX	135736974	GRCh37
139	CD4+ T-cell	chr14	102226255	GRCh37
140	CD4+ T-cell	chr12	94567648	GRCh37
141	CD4+ T-cell	chr17	16809825	GRCh37
142	CD4+ T-cell	chrX	135739123	GRCh37
143	CD4+ T-cell	chr7	105451145	GRCh37
144	CD4+ T-cell	chr2	239168496	GRCh37
145	CD4+ T-cell	chr10	43795590	GRCh37
146	CD4+ T-cell	chr9	132250116	GRCh37
147	CD4+ T-cell	chr22	43321867	GRCh37
148	CD4+ T-cell	chr7	20108740	GRCh37
149	CD4+ T-cell	chr13	40890039	GRCh37
150	CD4+ T-cell	chr9	100682392	GRCh37
151	CD4+ T-cell	chr5	130435027	GRCh37
152	CD4+ T-cell	chr14	92998059	GRCh37
153	CD4+ T-cell	chr11	2321937	GRCh37
154	CD4+ T-cell	chr16	30541701	GRCh37
155	CD4+ T-cell	chr3	152515771	GRCh37
156	CD4+ T-cell	chr4	185235478	GRCh37
157	CD4+ T-cell	chr6	15299918	GRCh37
158	CD4+ T-cell	chr18	56364755	GRCh37
159	CD4+ T-cell	chr11	122588588	GRCh37
160	CD4+ T-cell	chr2	204718473	GRCh37
161	CD4+ T-cell	chrX	135741339	GRCh37
162	CD4+ T-cell	chr1	116261289	GRCh37
163	CD4+ T-cell	chr3	129931318	GRCh37
164	CD4+ T-cell	chr2	30484559	GRCh37
165	CD4+ T-cell	chr3	32338739	GRCh37
166	CD4+ T-cell	chr11	60884589	GRCh37
167	CD4+ T-cell	chr3	5053444	GRCh37
168	CD4+ T-cell	chr1	158769806	GRCh37
169	CD4+ T-cell	chrX	135734392	GRCh37
170	CD4+ T-cell	chr10	8179181	GRCh37
171	CD4+ T-cell	chr9	100458241	GRCh37
172	CD4+ T-cell	chr2	12197834	GRCh37
173	CD4+ T-cell	chr3	33065190	GRCh37
174	CD4+ T-cell	chr2	234267206	GRCh37
175	CD4+ T-cell	chr1	168206538	GRCh37
176	CD4+ T-cell	chr10	63943983	GRCh37
177	CD4+ T-cell	chr1	14108102	GRCh37
178	CD4+ T-cell	chr11	60751904	GRCh37
179	CD4+ T-cell	chrX	135735940	GRCh37
180	CD4+ T-cell	chr3	49822925	GRCh37
181	CD4+ T-cell	chr8	97293907	GRCh37
182	CD4+ T-cell	chr22	20829589	GRCh37
183	CD4+ T-cell	chr12	10545471	GRCh37
184	CD4+ T-cell	chr14	69216479	GRCh37
185	CD4+ T-cell	chr14	23503042	GRCh37
186	CD4+ T-cell	chr11	95032746	GRCh37
187	CD4+ T-cell	chr17	37174578	GRCh37
188	CD4+ T-cell	chr14	76156581	GRCh37
189	CD4+ T-cell	chr2	11004289	GRCh37
190	CD4+ T-cell	chrX	135737570	GRCh37
191	CD4+ T-cell	chr12	110820726	GRCh37
192	CD4+ T-cell	chr5	67552096	GRCh37
193	CD4+ T-cell	chr20	56965599	GRCh37
194	CD4+ T-cell	chr1	92057848	GRCh37
195	CD4+ T-cell	chr7	37399663	GRCh37
196	CD4+ T-cell	chr12	104913342	GRCh37
197	CD4+ T-cell	chr1	85516847	GRCh37
198	CD4+ T-cell	chr1	246053750	GRCh37
199	CD4+ T-cell	chr2	204073434	GRCh37
200	CD4+ T-cell	chr16	78870906	GRCh37
201	CD4+ T-cell	chr19	2215177	GRCh37
202	CD4+ T-cell	chr1	226039749	GRCh37
203	CD4+ T-cell	chr11	47526612	GRCh37
204	CD4+ T-cell	chr4	143478363	GRCh37
205	CD4+ T-cell	chr3	190256399	GRCh37
206	CD4+ T-cell	chr4	102929482	GRCh37
207	CD4+ T-cell	chr10	88154074	GRCh37
208	CD4+ T-cell	chr1	8487958	GRCh37
209	CD4+ T-cell	chr15	93362454	GRCh37
210	CD4+ T-cell	chr2	204580533	GRCh37
211	CD4+ T-cell	chr6	135644405	GRCh37
212	CD4+ T-cell	chr1	234544971	GRCh37
213	CD4+ T-cell	chr2	28837110	GRCh37
214	CD4+ T-cell	chr3	129930988	GRCh37
215	CD4+ T-cell	chr15	91083533	GRCh37
216	CD4+ T-cell	chr5	112356556	GRCh37
217	CD4+ T-cell	chr9	92041450	GRCh37
218	CD4+ T-cell	chr1	171902707	GRCh37
219	CD4+ T-cell	chr6	37489009	GRCh37
220	CD4+ T-cell	chr2	204581087	GRCh37
221	CD4+ T-cell	chr1	113719999	GRCh37
222	CD4+ T-cell	chr10	35300810	GRCh37
223	CD4+ T-cell	chr16	3868936	GRCh37
224	CD4+ T-cell	chr14	90087103	GRCh37
225	CD4+ T-cell	chr3	32995178	GRCh37
226	CD4+ T-cell	chr10	35300798	GRCh37
227	CD4+ T-cell	chr10	115038137	GRCh37
228	CD4+ T-cell	chr10	63943952	GRCh37
229	CD4+ T-cell	chr3	98293191	GRCh37
230	CD4+ T-cell	chr12	111099719	GRCh37
231	CD4+ T-cell	chr20	10419030	GRCh37
232	CD4+ T-cell	chr5	31549372	GRCh37
233	CD4+ T-cell	chr4	185235499	GRCh37
234	CD4+ T-cell	chr2	70438162	GRCh37
235	CD4+ T-cell	chr10	63943985	GRCh37
236	CD4+ T-cell	chr22	45571660	GRCh37
237	CD4+ T-cell	chr2	204718667	GRCh37
238	CD4+ T-cell	chr7	98739614	GRCh37
239	CD4+ T-cell	chr7	37399636	GRCh37
240	CD4+ T-cell	chr15	91863297	GRCh37
241	CD4+ T-cell	chr4	99565575	GRCh37
242	CD4+ T-cell	chr5	100249302	GRCh37
243	CD4+ T-cell	chr21	46501330	GRCh37
244	CD4+ T-cell	chr12	10545461	GRCh37
245	CD4+ T-cell	chr8	71513853	GRCh37
246	CD4+ T-cell	chr7	105451143	GRCh37
247	CD4+ T-cell	chr1	214891597	GRCh37
248	CD4+ T-cell	chr3	196398883	GRCh37
249	CD4+ T-cell	chr12	123216677	GRCh37
250	CD4+ T-cell	chr12	10548006	GRCh37
251	CD4+ T-cell	chr2	12197790	GRCh37
252	CD4+ T-cell	chr7	158911578	GRCh37
253	CD4+ T-cell	chr1	75196096	GRCh37
254	CD4+ T-cell	chrX	135739193	GRCh37
255	CD4+ T-cell	chr3	66490267	GRCh37
256	CD4+ T-cell	chrX	41242929	GRCh37
257	CD4+ T-cell	chr20	47374961	GRCh37
258	CD4+ T-cell	chr14	94518623	GRCh37
259	CD4+ T-cell	chr15	94764389	GRCh37
260	CD4+ T-cell	chr1	245499946	GRCh37
261	CD4+ T-cell	chr4	37956372	GRCh37
262	CD4+ T-cell	chr17	17654304	GRCh37
263	CD4+ T-cell	chr2	234267155	GRCh37
264	CD4+ T-cell	chr17	64300780	GRCh37
265	CD4+ T-cell	chr1	2161856	GRCh37
266	CD4+ T-cell	chr17	37174566	GRCh37
267	CD4+ T-cell	chr9	82498384	GRCh37
268	CD4+ T-cell	chr2	55125375	GRCh37
269	CD4+ T-cell	chr1	38053026	GRCh37
270	CD4+ T-cell	chr16	50784048	GRCh37
271	CD4+ T-cell	chr1	85516884	GRCh37
272	CD4+ T-cell	chr4	146856906	GRCh37
273	CD4+ T-cell	chr17	28832587	GRCh37
274	CD4+ T-cell	chr11	86222471	GRCh37
275	CD4+ T-cell	chr16	30066978	GRCh37
276	CD4+ T-cell	chr6	106335726	GRCh37
277	CD4+ T-cell	chr10	135121203	GRCh37
278	CD4+ T-cell	chr14	93706484	GRCh37
279	CD4+ T-cell	chr4	37956546	GRCh37
280	CD4+ T-cell	chr8	8714737	GRCh37
281	CD4+ T-cell	chr11	60752946	GRCh37
282	CD4+ T-cell	chr7	38374996	GRCh37
283	CD4+ T-cell	chr13	80755136	GRCh37
284	CD4+ T-cell	chr2	190440023	GRCh37
285	CD4+ T-cell	chr2	86695928	GRCh37
286	CD4+ T-cell	chr19	11144227	GRCh37
287	CD4+ T-cell	chr18	13383064	GRCh37
288	CD4+ T-cell	chr13	111928958	GRCh37
289	CD4+ T-cell	chr10	69776403	GRCh37
290	CD4+ T-cell	chr22	42689920	GRCh37
291	CD4+ T-cell	chr2	148420966	GRCh37
292	CD4+ T-cell	chr21	39721306	GRCh37
293	CD4+ T-cell	chr1	55850352	GRCh37
294	CD4+ T-cell	chr9	74325199	GRCh37
295	CD4+ T-cell	chr22	20829128	GRCh37
296	CD4+ T-cell	chr12	110820696	GRCh37
297	CD4+ T-cell	chr5	112356858	GRCh37
298	CD4+ T-cell	chr2	129291699	GRCh37
299	CD4+ T-cell	chr8	11723890	GRCh37
300	CD4+ T-cell	chr4	146856908	GRCh37
301	CD4+ T-cell	chr1	180017329	GRCh37
302	CD4+ T-cell	chr10	62463285	GRCh37
303	CD4+ T-cell	chr4	37956383	GRCh37
304	CD4+ T-cell	chr1	214891605	GRCh37
305	CD4+ T-cell	chr14	89888970	GRCh37
306	CD4+ T-cell	chr17	1101111	GRCh37
307	CD4+ T-cell	chr1	117529597	GRCh37
308	CD4+ T-cell	chr10	62463238	GRCh37
309	CD4+ T-cell	chr14	93580858	GRCh37
310	CD4+ T-cell	chr16	57682036	GRCh37
311	CD4+ T-cell	chr4	123428884	GRCh37
312	CD4+ T-cell	chr6	21788536	GRCh37
313	CD4+ T-cell	chr1	229953759	GRCh37
314	CD4+ T-cell	chr12	117359978	GRCh37
315	CD4+ T-cell	chr12	69458755	GRCh37
316	CD4+ T-cell	chr2	165966479	GRCh37
317	CD4+ T-cell	chr2	37470800	GRCh37
318	CD4+ T-cell	chr2	59521889	GRCh37
319	CD4+ T-cell	chr3	129931004	GRCh37
320	CD4+ T-cell	chr10	88154090	GRCh37
321	CD4+ T-cell	chr6	120047520	GRCh37
322	CD4+ T-cell	chr1	27065673	GRCh37
323	CD4+ T-cell	chr7	107425823	GRCh37
324	CD4+ T-cell	chr1	214683705	GRCh37
325	CD4+ T-cell	chr5	126221621	GRCh37
326	CD4+ T-cell	chr11	47939769	GRCh37
327	CD4+ T-cell	chr7	90721279	GRCh37
328	CD4+ T-cell	chr8	100718146	GRCh37
329	CD4+ T-cell	chr14	99878822	GRCh37
330	CD4+ T-cell	chr15	91863702	GRCh37
331	CD4+ T-cell	chr21	37660971	GRCh37
332	CD4+ T-cell	chr2	15302578	GRCh37
333	CD4+ T-cell	chr12	111217322	GRCh37
334	CD4+ T-cell	chr14	93706357	GRCh37
335	CD4+ T-cell	chr2	75067930	GRCh37
336	CD4+ T-cell	chr2	144014841	GRCh37
337	CD4+ T-cell	chr12	69061294	GRCh37
338	CD4+ T-cell	chr4	7856580	GRCh37
339	CD4+ T-cell	chr19	46651087	GRCh37
340	CD4+ T-cell	chr17	57228455	GRCh37
341	CD4+ T-cell	chr14	99704576	GRCh37
342	CD4+ T-cell	chr7	129916908	GRCh37
343	CD4+ T-cell	chr5	176832952	GRCh37
344	CD4+ T-cell	chr6	15736243	GRCh37
345	CD4+ T-cell	chr12	26019716	GRCh37
346	CD4+ T-cell	chr21	43819704	GRCh37
347	CD4+ T-cell	chr16	82166948	GRCh37
348	CD4+ T-cell	chr19	35698456	GRCh37
349	CD4+ T-cell	chr12	129279306	GRCh37
350	CD4+ T-cell	chr3	33065640	GRCh37
351	CD4+ T-cell	chr14	102313413	GRCh37
352	CD4+ T-cell	chr7	872291	GRCh37
353	CD4+ T-cell	chr2	106755069	GRCh37
354	CD4+ T-cell	chr12	90258319	GRCh37
355	CD4+ T-cell	chr19	11195556	GRCh37
356	CD4+ T-cell	chr15	39823154	GRCh37
357	CD4+ T-cell	chr9	97160068	GRCh37
358	CD4+ T-cell	chr3	108552179	GRCh37
359	CD4+ T-cell	chr10	43308841	GRCh37
360	CD4+ T-cell	chr10	7474520	GRCh37
361	CD4+ T-cell	chr13	100010278	GRCh37
362	CD4+ T-cell	chr2	241342716	GRCh37
363	CD4+ T-cell	chr1	17639288	GRCh37
364	CD4+ T-cell	chr17	73362326	GRCh37
365	CD4+ T-cell	chr1	182057502	GRCh37
366	CD4+ T-cell	chr18	56215621	GRCh37
367	CD4+ T-cell	chr4	123539314	GRCh37
368	CD4+ T-cell	chr8	131313584	GRCh37
369	CD4+ T-cell	chr7	872293	GRCh37
370	CD4+ T-cell	chr2	46771193	GRCh37
371	CD4+ T-cell	chr5	158425813	GRCh37
372	CD4+ T-cell	chr11	60860378	GRCh37
373	CD4+ T-cell	chr6	135358814	GRCh37
374	CD4+ T-cell	chr3	33049581	GRCh37
375	CD4+ T-cell	chr16	50800762	GRCh37
376	CD4+ T-cell	chr12	120417804	GRCh37
377	CD4+ T-cell	chr14	55243204	GRCh37
378	CD4+ T-cell	chr4	37956339	GRCh37
379	CD4+ T-cell	chr6	167365855	GRCh37
380	CD4+ T-cell	chr2	171901164	GRCh37
381	CD4+ T-cell	chr1	246053785	GRCh37
382	CD4+ T-cell	chr4	151226280	GRCh37
383	CD4+ T-cell	chr1	182057507	GRCh37
384	CD4+ T-cell	chr1	168490320	GRCh37
385	CD4+ T-cell	chr7	44475971	GRCh37
386	CD4+ T-cell	chr6	21788522	GRCh37
387	CD4+ T-cell	chr18	56341750	GRCh37
388	CD4+ T-cell	chr3	98293262	GRCh37
389	CD4+ T-cell	chr15	63732866	GRCh37
390	CD4+ T-cell	chr11	60743553	GRCh37
391	CD4+ T-cell	chr3	129296856	GRCh37
392	CD4+ T-cell	chr5	882022	GRCh37
393	CD4+ T-cell	chr22	20829605	GRCh37
394	CD4+ T-cell	chr18	21636610	GRCh37
395	CD4+ T-cell	chr20	24343876	GRCh37
396	CD4+ T-cell	chr22	37615503	GRCh37
397	CD4+ T-cell	chr2	74225847	GRCh37
398	CD4+ T-cell	chr7	149126754	GRCh37
399	CD4+ T-cell	chr6	16422980	GRCh37
400	CD4+ T-cell	chr11	45104886	GRCh37
401	CD4+ T-cell	chr15	33941957	GRCh37
402	CD4+ T-cell	chr22	28371737	GRCh37
403	CD4+ T-cell	chr11	67651764	GRCh37
404	CD4+ T-cell	chr19	7001570	GRCh37
405	CD4+ T-cell	chr11	88343754	GRCh37
406	CD4+ T-cell	chr2	191876913	GRCh37
407	CD4+ T-cell	chr10	115727103	GRCh37
408	CD4+ T-cell	chr10	62487804	GRCh37
409	CD4+ T-cell	chr2	64291662	GRCh37
410	CD4+ T-cell	chr19	44280678	GRCh37
411	CD4+ T-cell	chr8	71529269	GRCh37
412	CD4+ T-cell	chr17	20150385	GRCh37
413	CD4+ T-cell	chr19	51872139	GRCh37
414	CD4+ T-cell	chr11	60752274	GRCh37
415	CD4+ T-cell	chr1	55850317	GRCh37
416	CD4+ T-cell	chr19	8583576	GRCh37
417	CD4+ T-cell	chr2	7139501	GRCh37
418	CD4+ T-cell	chr11	60750715	GRCh37
419	CD4+ T-cell	chr4	37956279	GRCh37
420	CD4+ T-cell	chr15	99243268	GRCh37
421	CD4+ T-cell	chr1	117557126	GRCh37
422	CD4+ T-cell	chr8	21772022	GRCh37
423	CD4+ T-cell	chr16	12174501	GRCh37
424	CD4+ T-cell	chr3	32995957	GRCh37
425	CD4+ T-cell	chr6	33637132	GRCh37
426	CD4+ T-cell	chr12	111115195	GRCh37
427	CD4+ T-cell	chr5	39171117	GRCh37
428	CD4+ T-cell	chr12	120418004	GRCh37
429	CD4+ T-cell	chr2	161341412	GRCh37
430	CD4+ T-cell	chr9	109678796	GRCh37
431	CD4+ T-cell	chr15	93798534	GRCh37
432	CD4+ T-cell	chr2	60397651	GRCh37
433	CD4+ T-cell	chr3	32995652	GRCh37
434	CD4+ T-cell	chr2	204799922	GRCh37
435	CD4+ T-cell	chr3	129297117	GRCh37
436	CD4+ T-cell	chr14	76156551	GRCh37
437	CD4+ T-cell	chr5	172424312	GRCh37
438	CD4+ T-cell	chr21	47857052	GRCh37
439	CD4+ T-cell	chr16	14258841	GRCh37
440	CD4+ T-cell	chr3	195005823	GRCh37
441	CD4+ T-cell	chr20	55098586	GRCh37
442	CD4+ T-cell	chr7	43344724	GRCh37
443	CD4+ T-cell	chr6	143752388	GRCh37
444	CD4+ T-cell	chr1	108281214	GRCh37
445	CD4+ T-cell	chr8	103420581	GRCh37
446	CD4+ T-cell	chr16	30067013	GRCh37
447	CD4+ T-cell	chr10	11704643	GRCh37
448	CD4+ T-cell	chr1	8487928	GRCh37
449	CD4+ T-cell	chr14	102549245	GRCh37
450	CD4+ T-cell	chr15	91863741	GRCh37
451	CD4+ T-cell	chr6	10534193	GRCh37
452	CD4+ T-cell	chr4	53876336	GRCh37
453	CD4+ T-cell	chr5	149994864	GRCh37
454	CD4+ T-cell	chr2	197127382	GRCh37
455	CD4+ T-cell	chr14	66258448	GRCh37
456	CD4+ T-cell	chr17	49173510	GRCh37
457	CD4+ T-cell	chr22	35732228	GRCh37
458	CD4+ T-cell	chr22	45708696	GRCh37
459	CD4+ T-cell	chr1	12218890	GRCh37
460	CD4+ T-cell	chr9	136512618	GRCh37
461	CD4+ T-cell	chr2	204581232	GRCh37
462	CD4+ T-cell	chr11	45104791	GRCh37
463	CD4+ T-cell	chr7	158911586	GRCh37
464	CD4+ T-cell	chr2	204800855	GRCh37
465	CD4+ T-cell	chr4	90638578	GRCh37
466	CD4+ T-cell	chr1	220213588	GRCh37
467	CD4+ T-cell	chr5	148726893	GRCh37
468	CD4+ T-cell	chr7	139896993	GRCh37
469	CD4+ T-cell	chr3	129296878	GRCh37
470	CD4+ T-cell	chr15	102237661	GRCh37
471	CD4+ T-cell	chr2	190432558	GRCh37
472	CD4+ T-cell	chr1	90078133	GRCh37
473	CD4+ T-cell	chr6	15300156	GRCh37
474	CD4+ T-cell	chr2	73512383	GRCh37
475	CD4+ T-cell	chr3	19031311	GRCh37
476	CD4+ T-cell	chr16	56511813	GRCh37
477	CD4+ T-cell	chr12	28024177	GRCh37
478	CD4+ T-cell	chr15	61067342	GRCh37
479	CD4+ T-cell	chr18	9109693	GRCh37
480	CD4+ T-cell	chr7	150375888	GRCh37
481	CD4+ T-cell	chr4	146856903	GRCh37
482	CD4+ T-cell	chr1	85516852	GRCh37
483	CD4+ T-cell	chr11	60743323	GRCh37
484	CD4+ T-cell	chr8	268782	GRCh37
485	CD4+ T-cell	chr3	112076926	GRCh37
486	CD4+ T-cell	chr17	1776469	GRCh37
487	CD4+ T-cell	chr14	21185737	GRCh37
488	CD4+ T-cell	chr10	1140531	GRCh37
489	CD4+ T-cell	chr7	105463723	GRCh37
490	CD4+ T-cell	chr11	60754514	GRCh37
491	CD4+ T-cell	chr9	77386336	GRCh37
492	CD4+ T-cell	chr11	10237951	GRCh37
493	CD4+ T-cell	chr13	42114658	GRCh37
494	CD4+ T-cell	chr20	47375039	GRCh37
495	CD4+ T-cell	chr1	114923028	GRCh37
496	CD4+ T-cell	chr4	141515866	GRCh37
497	CD4+ T-cell	chr3	108554891	GRCh37
498	CD4+ T-cell	chr22	37517997	GRCh37
499	CD4+ T-cell	chr14	76156437	GRCh37
500	CD4+ T-cell	chr1	244758540	GRCh37
1	CD8+ T-cell	chr2	87054037	GRCh37
2	CD8+ T-cell	chr2	87013970	GRCh37
3	CD8+ T-cell	chr2	87037812	GRCh37
4	CD8+ T-cell	chr2	87033839	GRCh37
5	CD8+ T-cell	chr2	87037851	GRCh37
6	CD8+ T-cell	chr2	87088203	GRCh37
7	CD8+ T-cell	chr2	87054047	GRCh37
8	CD8+ T-cell	chr2	87014643	GRCh37
9	CD8+ T-cell	chr2	87013939	GRCh37
10	CD8+ T-cell	chr2	87013959	GRCh37
11	CD8+ T-cell	chr2	87039599	GRCh37
12	CD8+ T-cell	chr2	87020531	GRCh37
13	CD8+ T-cell	chr2	87048842	GRCh37
14	CD8+ T-cell	chr19	41270021	GRCh37
15	CD8+ T-cell	chr2	87013925	GRCh37
16	CD8+ T-cell	chr2	87048852	GRCh37
17	CD8+ T-cell	chr2	87019612	GRCh37
18	CD8+ T-cell	chr10	103121010	GRCh37
19	CD8+ T-cell	chr5	138027769	GRCh37
20	CD8+ T-cell	chr17	19510716	GRCh37
21	CD8+ T-cell	chr12	111094221	GRCh37
22	CD8+ T-cell	chr14	51236254	GRCh37
23	CD8+ T-cell	chr6	42247188	GRCh37
24	CD8+ T-cell	chr8	10201709	GRCh37
25	CD8+ T-cell	chr9	36203081	GRCh37
26	CD8+ T-cell	chr9	80852901	GRCh37
27	CD8+ T-cell	chr6	131845999	GRCh37
28	CD8+ T-cell	chr5	86557237	GRCh37
29	CD8+ T-cell	chr1	228527765	GRCh37
30	CD8+ T-cell	chr5	142607108	GRCh37
31	CD8+ T-cell	chr1	42099682	GRCh37
32	CD8+ T-cell	chr13	51282401	GRCh37
33	CD8+ T-cell	chr10	11685583	GRCh37
34	CD8+ T-cell	chr1	117158777	GRCh37
35	CD8+ T-cell	chr6	5501822	GRCh37
36	CD8+ T-cell	chr10	111803688	GRCh37
37	CD8+ T-cell	chr5	123828489	GRCh37
38	CD8+ T-cell	chr8	48385534	GRCh37
39	CD8+ T-cell	chr14	103368214	GRCh37
40	CD8+ T-cell	chr19	53047519	GRCh37
41	CD8+ T-cell	chr13	27629849	GRCh37
42	CD8+ T-cell	chr14	75411875	GRCh37
43	CD8+ T-cell	chr7	2076950	GRCh37
44	CD8+ T-cell	chr18	67672972	GRCh37
45	CD8+ T-cell	chr8	128773372	GRCh37
46	CD8+ T-cell	chr12	132443642	GRCh37
47	CD8+ T-cell	chr14	100566527	GRCh37
48	CD8+ T-cell	chr1	12013318	GRCh37
49	CD8+ T-cell	chr8	61689287	GRCh37
50	CD8+ T-cell	chr1	35976045	GRCh37
51	CD8+ T-cell	chr16	4462685	GRCh37
52	CD8+ T-cell	chr1	42421698	GRCh37
53	CD8+ T-cell	chr22	28135472	GRCh37
54	CD8+ T-cell	chr2	203202519	GRCh37
55	CD8+ T-cell	chr1	204514128	GRCh37
56	CD8+ T-cell	chr16	53493172	GRCh37
57	CD8+ T-cell	chr10	7888731	GRCh37
58	CD8+ T-cell	chr2	39291076	GRCh37
59	CD8+ T-cell	chr15	99385860	GRCh37
60	CD8+ T-cell	chr11	60755343	GRCh37
61	CD8+ T-cell	chr8	38254839	GRCh37
62	CD8+ T-cell	chr5	61255905	GRCh37
63	CD8+ T-cell	chr9	126332394	GRCh37
64	CD8+ T-cell	chr8	41978340	GRCh37
65	CD8+ T-cell	chr20	23232800	GRCh37
66	CD8+ T-cell	chr15	86219832	GRCh37
67	CD8+ T-cell	chr11	68230237	GRCh37
68	CD8+ T-cell	chr16	15773552	GRCh37
69	CD8+ T-cell	chr17	80361617	GRCh37
70	CD8+ T-cell	chr9	108512304	GRCh37
71	CD8+ T-cell	chr16	29319261	GRCh37
72	CD8+ T-cell	chr2	33349916	GRCh37
73	CD8+ T-cell	chr4	37956301	GRCh37
74	CD8+ T-cell	chr5	171608517	GRCh37
75	CD8+ T-cell	chr8	60530075	GRCh37
76	CD8+ T-cell	chr19	7962955	GRCh37
77	CD8+ T-cell	chr1	6988252	GRCh37
78	CD8+ T-cell	chr2	48535817	GRCh37
79	CD8+ T-cell	chr12	12853999	GRCh37
80	CD8+ T-cell	chr3	52084791	GRCh37
81	CD8+ T-cell	chr12	65617128	GRCh37
82	CD8+ T-cell	chr10	11449674	GRCh37
83	CD8+ T-cell	chr12	122836792	GRCh37
84	CD8+ T-cell	chr3	188039565	GRCh37
85	CD8+ T-cell	chr9	95267100	GRCh37
86	CD8+ T-cell	chr21	47027120	GRCh37
87	CD8+ T-cell	chr5	75042080	GRCh37
88	CD8+ T-cell	chr12	22550374	GRCh37
89	CD8+ T-cell	chr4	102380581	GRCh37
90	CD8+ T-cell	chr3	196867410	GRCh37
91	CD8+ T-cell	chr1	6351872	GRCh37
92	CD8+ T-cell	chr20	35564036	GRCh37
93	CD8+ T-cell	chr19	31592356	GRCh37
94	CD8+ T-cell	chr11	82786207	GRCh37
95	CD8+ T-cell	chr5	81808185	GRCh37
96	CD8+ T-cell	chr5	54165054	GRCh37
97	CD8+ T-cell	chr8	11744682	GRCh37
98	CD8+ T-cell	chr20	35122357	GRCh37
99	CD8+ T-cell	chr15	81322155	GRCh37
100	CD8+ T-cell	chr3	108554869	GRCh37
101	CD8+ T-cell	chr7	127657260	GRCh37
102	CD8+ T-cell	chr15	57479535	GRCh37
103	CD8+ T-cell	chr5	39186292	GRCh37
104	CD8+ T-cell	chr18	74784360	GRCh37
105	CD8+ T-cell	chr8	125646086	GRCh37
106	CD8+ T-cell	chr1	164757459	GRCh37
107	CD8+ T-cell	chr12	27606286	GRCh37
108	CD8+ T-cell	chr6	131846044	GRCh37
109	CD8+ T-cell	chr8	19251001	GRCh37
110	CD8+ T-cell	chr16	29005890	GRCh37
111	CD8+ T-cell	chr1	90073617	GRCh37
112	CD8+ T-cell	chr3	71648377	GRCh37
113	CD8+ T-cell	chr7	30953414	GRCh37
114	CD8+ T-cell	chr7	151402006	GRCh37
115	CD8+ T-cell	chr19	10254578	GRCh37
116	CD8+ T-cell	chr3	5053581	GRCh37
117	CD8+ T-cell	chr12	122102085	GRCh37
118	CD8+ T-cell	chr5	109040299	GRCh37
119	CD8+ T-cell	chr7	138510333	GRCh37
120	CD8+ T-cell	chr1	19834961	GRCh37
121	CD8+ T-cell	chr11	8485704	GRCh37
122	CD8+ T-cell	chr12	51418189	GRCh37
123	CD8+ T-cell	chr12	122474966	GRCh37
124	CD8+ T-cell	chr20	431069	GRCh37
125	CD8+ T-cell	chr4	169971049	GRCh37
126	CD8+ T-cell	chr7	94919979	GRCh37
127	CD8+ T-cell	chr14	59150572	GRCh37
128	CD8+ T-cell	chr3	177134932	GRCh37
129	CD8+ T-cell	chr17	65244505	GRCh37
130	CD8+ T-cell	chr19	50056466	GRCh37
131	CD8+ T-cell	chr12	22550372	GRCh37
132	CD8+ T-cell	chr7	104702724	GRCh37
133	CD8+ T-cell	chr7	100471394	GRCh37
134	CD8+ T-cell	chr6	35798625	GRCh37
135	CD8+ T-cell	chr19	7102246	GRCh37
136	CD8+ T-cell	chr4	83346819	GRCh37
137	CD8+ T-cell	chr3	117208034	GRCh37
138	CD8+ T-cell	chr17	17083312	GRCh37
139	CD8+ T-cell	chr19	40201242	GRCh37
140	CD8+ T-cell	chr1	41065504	GRCh37
141	CD8+ T-cell	chr3	5053199	GRCh37
142	CD8+ T-cell	chr3	72025280	GRCh37
143	CD8+ T-cell	chr15	22474906	GRCh37
144	CD8+ T-cell	chr15	99179786	GRCh37
145	CD8+ T-cell	chr1	233381228	GRCh37
146	CD8+ T-cell	chr2	114388172	GRCh37
147	CD8+ T-cell	chr3	48279359	GRCh37
148	CD8+ T-cell	chr1	2506285	GRCh37
149	CD8+ T-cell	chr17	56013560	GRCh37
150	CD8+ T-cell	chr12	96632268	GRCh37
151	CD8+ T-cell	chr1	3518551	GRCh37
152	CD8+ T-cell	chr8	39823540	GRCh37
153	CD8+ T-cell	chr11	75924980	GRCh37
154	CD8+ T-cell	chr18	74787085	GRCh37
155	CD8+ T-cell	chr12	6830879	GRCh37
156	CD8+ T-cell	chr8	142225171	GRCh37
157	CD8+ T-cell	chr6	44121947	GRCh37
158	CD8+ T-cell	chr11	93897936	GRCh37
159	CD8+ T-cell	chr2	216306389	GRCh37
160	CD8+ T-cell	chr14	99904001	GRCh37
161	CD8+ T-cell	chr20	24957797	GRCh37
162	CD8+ T-cell	chr5	54165023	GRCh37
163	CD8+ T-cell	chr19	8580509	GRCh37
164	CD8+ T-cell	chr2	210878323	GRCh37
165	CD8+ T-cell	chr2	198863601	GRCh37
166	CD8+ T-cell	chr11	122002848	GRCh37
167	CD8+ T-cell	chr1	114398231	GRCh37
168	CD8+ T-cell	chr1	113265945	GRCh37
169	CD8+ T-cell	chr19	19713490	GRCh37
170	CD8+ T-cell	chr2	105154796	GRCh37
171	CD8+ T-cell	chr2	46283362	GRCh37
172	CD8+ T-cell	chr5	43608508	GRCh37
173	CD8+ T-cell	chr8	18607779	GRCh37
174	CD8+ T-cell	chr17	9074349	GRCh37
175	CD8+ T-cell	chr2	176447696	GRCh37
176	CD8+ T-cell	chr12	56333056	GRCh37
177	CD8+ T-cell	chr17	559010	GRCh37
178	CD8+ T-cell	chr10	15229790	GRCh37
179	CD8+ T-cell	chr18	2509092	GRCh37
180	CD8+ T-cell	chr16	50080446	GRCh37
181	CD8+ T-cell	chr3	113204545	GRCh37
182	CD8+ T-cell	chr20	47384829	GRCh37
183	CD8+ T-cell	chr16	15970484	GRCh37
184	CD8+ T-cell	chr11	44601960	GRCh37
185	CD8+ T-cell	chr20	36425399	GRCh37
186	CD8+ T-cell	chr12	68932382	GRCh37
187	CD8+ T-cell	chr7	111125381	GRCh37
188	CD8+ T-cell	chr1	154199591	GRCh37
189	CD8+ T-cell	chr19	4875991	GRCh37
190	CD8+ T-cell	chr1	120264760	GRCh37
191	CD8+ T-cell	chr18	18669422	GRCh37
192	CD8+ T-cell	chr2	39291223	GRCh37
193	CD8+ T-cell	chr11	60872131	GRCh37
194	CD8+ T-cell	chr11	117280371	GRCh37
195	CD8+ T-cell	chr11	43739393	GRCh37
196	CD8+ T-cell	chr17	58353505	GRCh37
197	CD8+ T-cell	chr2	26572734	GRCh37
198	CD8+ T-cell	chr1	113623162	GRCh37
199	CD8+ T-cell	chr4	178163976	GRCh37
200	CD8+ T-cell	chr20	34283138	GRCh37
201	CD8+ T-cell	chr1	8422919	GRCh37
202	CD8+ T-cell	chr17	76380292	GRCh37
203	CD8+ T-cell	chr4	155522320	GRCh37
204	CD8+ T-cell	chr10	43795576	GRCh37
205	CD8+ T-cell	chr9	15215227	GRCh37
206	CD8+ T-cell	chr5	39209410	GRCh37
207	CD8+ T-cell	chr17	72471189	GRCh37
208	CD8+ T-cell	chr11	67321777	GRCh37
209	CD8+ T-cell	chr13	53255037	GRCh37
210	CD8+ T-cell	chr1	120466431	GRCh37
211	CD8+ T-cell	chr11	60833208	GRCh37
212	CD8+ T-cell	chr1	232712530	GRCh37
213	CD8+ T-cell	chr4	7878564	GRCh37
214	CD8+ T-cell	chr14	92199710	GRCh37
215	CD8+ T-cell	chr11	75022108	GRCh37
216	CD8+ T-cell	chr21	38554821	GRCh37
217	CD8+ T-cell	chr11	68246978	GRCh37
218	CD8+ T-cell	chr5	178955444	GRCh37
219	CD8+ T-cell	chr19	16549401	GRCh37
220	CD8+ T-cell	chr1	224541402	GRCh37
221	CD8+ T-cell	chr17	49175013	GRCh37
222	CD8+ T-cell	chr5	153364453	GRCh37
223	CD8+ T-cell	chr7	47345242	GRCh37
224	CD8+ T-cell	chr8	141116272	GRCh37
225	CD8+ T-cell	chr14	75929819	GRCh37
226	CD8+ T-cell	chr18	46297829	GRCh37
227	CD8+ T-cell	chr10	94017766	GRCh37
228	CD8+ T-cell	chr16	30637630	GRCh37
229	CD8+ T-cell	chr22	20929546	GRCh37
230	CD8+ T-cell	chr5	39121571	GRCh37
231	CD8+ T-cell	chr5	74647159	GRCh37
232	CD8+ T-cell	chr2	190120715	GRCh37
233	CD8+ T-cell	chr13	45918993	GRCh37
234	CD8+ T-cell	chr2	231013100	GRCh37
235	CD8+ T-cell	chr12	129403322	GRCh37
236	CD8+ T-cell	chr14	55841734	GRCh37
237	CD8+ T-cell	chr8	59956812	GRCh37
238	CD8+ T-cell	chr15	85304677	GRCh37
239	CD8+ T-cell	chr19	42279169	GRCh37
240	CD8+ T-cell	chr16	80970891	GRCh37
241	CD8+ T-cell	chr17	75415589	GRCh37
242	CD8+ T-cell	chr1	3799788	GRCh37
243	CD8+ T-cell	chr11	36482302	GRCh37
244	CD8+ T-cell	chr8	140801447	GRCh37
245	CD8+ T-cell	chr22	23896852	GRCh37
246	CD8+ T-cell	chr10	98585412	GRCh37
247	CD8+ T-cell	chr7	127528007	GRCh37
248	CD8+ T-cell	chr12	46059822	GRCh37
249	CD8+ T-cell	chr4	152621956	GRCh37
250	CD8+ T-cell	chr10	75948655	GRCh37
251	CD8+ T-cell	chr2	238973189	GRCh37
252	CD8+ T-cell	chr17	76664600	GRCh37
253	CD8+ T-cell	chr10	93594427	GRCh37
254	CD8+ T-cell	chr9	33339810	GRCh37
255	CD8+ T-cell	chr2	204732944	GRCh37
256	CD8+ T-cell	chr4	48731017	GRCh37
257	CD8+ T-cell	chr16	87757945	GRCh37
258	CD8+ T-cell	chr10	104716110	GRCh37
259	CD8+ T-cell	chr6	84871414	GRCh37
260	CD8+ T-cell	chr6	13641562	GRCh37
261	CD8+ T-cell	chr14	102242960	GRCh37
262	CD8+ T-cell	chr15	42534801	GRCh37
263	CD8+ T-cell	chr20	44750272	GRCh37
264	CD8+ T-cell	chr2	25031877	GRCh37
265	CD8+ T-cell	chr22	47070265	GRCh37
266	CD8+ T-cell	chr22	19999238	GRCh37
267	CD8+ T-cell	chr17	2707868	GRCh37
268	CD8+ T-cell	chr3	142840671	GRCh37
269	CD8+ T-cell	chr6	44421477	GRCh37
270	CD8+ T-cell	chr9	4991538	GRCh37
271	CD8+ T-cell	chr7	111973477	GRCh37
272	CD8+ T-cell	chr7	138518834	GRCh37
273	CD8+ T-cell	chr5	6751238	GRCh37
274	CD8+ T-cell	chr6	111140599	GRCh37
275	CD8+ T-cell	chr10	61984199	GRCh37
276	CD8+ T-cell	chr2	135124029	GRCh37
277	CD8+ T-cell	chr9	115683535	GRCh37
278	CD8+ T-cell	chr12	122836899	GRCh37
279	CD8+ T-cell	chr15	72124490	GRCh37
280	CD8+ T-cell	chr3	184026454	GRCh37
281	CD8+ T-cell	chr1	154587504	GRCh37
282	CD8+ T-cell	chr2	42445619	GRCh37
283	CD8+ T-cell	chr6	6630936	GRCh37
284	CD8+ T-cell	chr5	57284396	GRCh37
285	CD8+ T-cell	chr4	160173024	GRCh37
286	CD8+ T-cell	chr17	70630704	GRCh37
287	CD8+ T-cell	chr9	38682694	GRCh37
288	CD8+ T-cell	chr10	62341042	GRCh37
289	CD8+ T-cell	chr8	38689160	GRCh37
290	CD8+ T-cell	chr19	3555199	GRCh37
291	CD8+ T-cell	chr1	23468706	GRCh37
292	CD8+ T-cell	chr15	99934036	GRCh37
293	CD8+ T-cell	chr22	45747134	GRCh37
294	CD8+ T-cell	chr19	3556113	GRCh37
295	CD8+ T-cell	chr5	111526270	GRCh37
296	CD8+ T-cell	chr14	35460555	GRCh37
297	CD8+ T-cell	chr21	40591982	GRCh37
298	CD8+ T-cell	chr14	96117955	GRCh37
299	CD8+ T-cell	chr2	231742991	GRCh37
300	CD8+ T-cell	chr15	77871379	GRCh37
301	CD8+ T-cell	chr6	6630938	GRCh37
302	CD8+ T-cell	chr17	76751458	GRCh37
303	CD8+ T-cell	chr2	98450772	GRCh37
304	CD8+ T-cell	chr19	50056444	GRCh37
305	CD8+ T-cell	chr19	36410474	GRCh37
306	CD8+ T-cell	chr17	74147518	GRCh37
307	CD8+ T-cell	chr18	21126386	GRCh37
308	CD8+ T-cell	chr12	4233373	GRCh37
309	CD8+ T-cell	chr11	33880531	GRCh37
310	CD8+ T-cell	chr10	111753304	GRCh37
311	CD8+ T-cell	chr7	1983451	GRCh37
312	CD8+ T-cell	chr11	60850633	GRCh37
313	CD8+ T-cell	chr4	22486749	GRCh37
314	CD8+ T-cell	chr1	246146738	GRCh37
315	CD8+ T-cell	chr17	41845256	GRCh37
316	CD8+ T-cell	chr19	38611513	GRCh37
317	CD8+ T-cell	chr8	26272630	GRCh37
318	CD8+ T-cell	chr2	225961660	GRCh37
319	CD8+ T-cell	chr14	103355860	GRCh37
320	CD8+ T-cell	chr5	137998486	GRCh37
321	CD8+ T-cell	chr12	48323425	GRCh37
322	CD8+ T-cell	chr1	247381803	GRCh37
323	CD8+ T-cell	chr5	32244460	GRCh37
324	CD8+ T-cell	chr1	76959786	GRCh37
325	CD8+ T-cell	chr19	38772933	GRCh37
326	CD8+ T-cell	chr16	58894022	GRCh37
327	CD8+ T-cell	chr3	129931304	GRCh37
328	CD8+ T-cell	chr9	2025272	GRCh37
329	CD8+ T-cell	chr8	145786529	GRCh37
330	CD8+ T-cell	chr15	101709905	GRCh37
331	CD8+ T-cell	chr10	5552645	GRCh37
332	CD8+ T-cell	chr2	169110438	GRCh37
333	CD8+ T-cell	chr6	160232485	GRCh37
334	CD8+ T-cell	chr9	132014872	GRCh37
335	CD8+ T-cell	chr10	52364038	GRCh37
336	CD8+ T-cell	chr11	60752952	GRCh37
337	CD8+ T-cell	chr3	5053241	GRCh37
338	CD8+ T-cell	chr14	99704578	GRCh37
339	CD8+ T-cell	chr17	49057093	GRCh37
340	CD8+ T-cell	chr3	36990155	GRCh37
341	CD8+ T-cell	chr11	63435340	GRCh37
342	CD8+ T-cell	chr11	60878988	GRCh37
343	CD8+ T-cell	chr7	137931473	GRCh37
344	CD8+ T-cell	chr19	38087066	GRCh37
345	CD8+ T-cell	chr6	136698800	GRCh37
346	CD8+ T-cell	chr8	21772040	GRCh37
347	CD8+ T-cell	chr16	55148980	GRCh37
348	CD8+ T-cell	chr2	211018283	GRCh37
349	CD8+ T-cell	chr10	13852120	GRCh37
350	CD8+ T-cell	chr21	24892783	GRCh37
351	CD8+ T-cell	chr20	32408914	GRCh37
352	CD8+ T-cell	chr14	75695397	GRCh37
353	CD8+ T-cell	chr10	13098429	GRCh37
354	CD8+ T-cell	chr10	20723539	GRCh37
355	CD8+ T-cell	chr1	21125260	GRCh37
356	CD8+ T-cell	chr19	13211396	GRCh37
357	CD8+ T-cell	chr11	63615545	GRCh37
358	CD8+ T-cell	chr16	4462739	GRCh37
359	CD8+ T-cell	chr14	92336811	GRCh37
360	CD8+ T-cell	chr6	124870240	GRCh37
361	CD8+ T-cell	chr8	27984864	GRCh37
362	CD8+ T-cell	chr8	240113	GRCh37
363	CD8+ T-cell	chr3	126310929	GRCh37
364	CD8+ T-cell	chr9	96265780	GRCh37
365	CD8+ T-cell	chr2	68982634	GRCh37
366	CD8+ T-cell	chr13	40890049	GRCh37
367	CD8+ T-cell	chr14	103368222	GRCh37
368	CD8+ T-cell	chr11	128349642	GRCh37
369	CD8+ T-cell	chr8	145751749	GRCh37
370	CD8+ T-cell	chr7	102946144	GRCh37
371	CD8+ T-cell	chr22	20757315	GRCh37
372	CD8+ T-cell	chr19	4652223	GRCh37
373	CD8+ T-cell	chr17	61468308	GRCh37
374	CD8+ T-cell	chr4	6826321	GRCh37
375	CD8+ T-cell	chr10	127379912	GRCh37
376	CD8+ T-cell	chr2	3436391	GRCh37
377	CD8+ T-cell	chr1	202525309	GRCh37
378	CD8+ T-cell	chr6	159344921	GRCh37
379	CD8+ T-cell	chr22	20014435	GRCh37
380	CD8+ T-cell	chr2	135124180	GRCh37
381	CD8+ T-cell	chr14	23502839	GRCh37
382	CD8+ T-cell	chr7	1864801	GRCh37
383	CD8+ T-cell	chr6	158872617	GRCh37
384	CD8+ T-cell	chr3	193332732	GRCh37
385	CD8+ T-cell	chr1	14996923	GRCh37
386	CD8+ T-cell	chr16	47600599	GRCh37
387	CD8+ T-cell	chr20	34017300	GRCh37
388	CD8+ T-cell	chr10	134730140	GRCh37
389	CD8+ T-cell	chr6	13510215	GRCh37
390	CD8+ T-cell	chr15	38950942	GRCh37
391	CD8+ T-cell	chr6	52443726	GRCh37
392	CD8+ T-cell	chr9	2733005	GRCh37
393	CD8+ T-cell	chr1	6838033	GRCh37
394	CD8+ T-cell	chr2	60581736	GRCh37
395	CD8+ T-cell	chr19	45798993	GRCh37
396	CD8+ T-cell	chr1	92308012	GRCh37
397	CD8+ T-cell	chr1	52962728	GRCh37
398	CD8+ T-cell	chr2	113470968	GRCh37
399	CD8+ T-cell	chr9	109678810	GRCh37
400	CD8+ T-cell	chr2	191431641	GRCh37
401	CD8+ T-cell	chr7	147728554	GRCh37
402	CD8+ T-cell	chr6	131429186	GRCh37
403	CD8+ T-cell	chr14	60048918	GRCh37
404	CD8+ T-cell	chr19	47636497	GRCh37
405	CD8+ T-cell	chr11	72606772	GRCh37
406	CD8+ T-cell	chr7	7887501	GRCh37
407	CD8+ T-cell	chr18	23113176	GRCh37
408	CD8+ T-cell	chr1	1538746	GRCh37
409	CD8+ T-cell	chr9	98039304	GRCh37
410	CD8+ T-cell	chr16	89167278	GRCh37
411	CD8+ T-cell	chr1	156755881	GRCh37
412	CD8+ T-cell	chr5	76059581	GRCh37
413	CD8+ T-cell	chr1	202727577	GRCh37
414	CD8+ T-cell	chr14	100914962	GRCh37
415	CD8+ T-cell	chr11	113831236	GRCh37
416	CD8+ T-cell	chr2	105718452	GRCh37
417	CD8+ T-cell	chr1	167406502	GRCh37
418	CD8+ T-cell	chr10	129718357	GRCh37
419	CD8+ T-cell	chr9	131556857	GRCh37
420	CD8+ T-cell	chr3	72008020	GRCh37
421	CD8+ T-cell	chr19	33152571	GRCh37
422	CD8+ T-cell	chr3	169714271	GRCh37
423	CD8+ T-cell	chrX	14601317	GRCh37
424	CD8+ T-cell	chr14	21185814	GRCh37
425	CD8+ T-cell	chr1	201344908	GRCh37
426	CD8+ T-cell	chr16	30146942	GRCh37
427	CD8+ T-cell	chr4	42240932	GRCh37
428	CD8+ T-cell	chr8	27298248	GRCh37
429	CD8+ T-cell	chr16	56235445	GRCh37
430	CD8+ T-cell	chr19	49911196	GRCh37
431	CD8+ T-cell	chr22	23233077	GRCh37
432	CD8+ T-cell	chr8	124913912	GRCh37
433	CD8+ T-cell	chr19	21581803	GRCh37
434	CD8+ T-cell	chr2	204148129	GRCh37
435	CD8+ T-cell	chr4	22667096	GRCh37
436	CD8+ T-cell	chr16	16167765	GRCh37
437	CD8+ T-cell	chr17	72732823	GRCh37
438	CD8+ T-cell	chr22	22125305	GRCh37
439	CD8+ T-cell	chr17	7131584	GRCh37
440	CD8+ T-cell	chr4	89951198	GRCh37
441	CD8+ T-cell	chr15	42633853	GRCh37
442	CD8+ T-cell	chr11	63384789	GRCh37
443	CD8+ T-cell	chr20	33125854	GRCh37
444	CD8+ T-cell	chr14	69565900	GRCh37
445	CD8+ T-cell	chr8	11398736	GRCh37
446	CD8+ T-cell	chr5	177391617	GRCh37
447	CD8+ T-cell	chr4	3357378	GRCh37
448	CD8+ T-cell	chr19	50056474	GRCh37
449	CD8+ T-cell	chr11	47637422	GRCh37
450	CD8+ T-cell	chr4	48214466	GRCh37
451	CD8+ T-cell	chr7	2709855	GRCh37
452	CD8+ T-cell	chr20	49148899	GRCh37
453	CD8+ T-cell	chr7	128274498	GRCh37
454	CD8+ T-cell	chr8	61926577	GRCh37
455	CD8+ T-cell	chr1	153996350	GRCh37
456	CD8+ T-cell	chr19	47693277	GRCh37
457	CD8+ T-cell	chr7	152272313	GRCh37
458	CD8+ T-cell	chr18	22744603	GRCh37
459	CD8+ T-cell	chr4	11652628	GRCh37
460	CD8+ T-cell	chr18	43187087	GRCh37
461	CD8+ T-cell	chr17	57228618	GRCh37
462	CD8+ T-cell	chr9	117334402	GRCh37
463	CD8+ T-cell	chr8	134264557	GRCh37
464	CD8+ T-cell	chr5	157467596	GRCh37
465	CD8+ T-cell	chr5	1639096	GRCh37
466	CD8+ T-cell	chr10	94664235	GRCh37
467	CD8+ T-cell	chr11	122572278	GRCh37
468	CD8+ T-cell	chr2	71362236	GRCh37
469	CD8+ T-cell	chr22	29020282	GRCh37
470	CD8+ T-cell	chr15	70706499	GRCh37
471	CD8+ T-cell	chr1	225515722	GRCh37
472	CD8+ T-cell	chr2	198349697	GRCh37
473	CD8+ T-cell	chr17	2695239	GRCh37
474	CD8+ T-cell	chr7	105429409	GRCh37
475	CD8+ T-cell	chr12	133241997	GRCh37
476	CD8+ T-cell	chr16	10947200	GRCh37
477	CD8+ T-cell	chr3	73559372	GRCh37
478	CD8+ T-cell	chr15	68475010	GRCh37
479	CD8+ T-cell	chr7	98693904	GRCh37
480	CD8+ T-cell	chr4	110921401	GRCh37
481	CD8+ T-cell	chr9	124369114	GRCh37
482	CD8+ T-cell	chr20	30112401	GRCh37
483	CD8+ T-cell	chr3	33104513	GRCh37
484	CD8+ T-cell	chr17	35547198	GRCh37
485	CD8+ T-cell	chr16	2240493	GRCh37
486	CD8+ T-cell	chr3	69313006	GRCh37
487	CD8+ T-cell	chr12	4233253	GRCh37
488	CD8+ T-cell	chr5	156307394	GRCh37
489	CD8+ T-cell	chr9	126960113	GRCh37
490	CD8+ T-cell	chr21	39738994	GRCh37
491	CD8+ T-cell	chr2	238381724	GRCh37
492	CD8+ T-cell	chr6	6855093	GRCh37
493	CD8+ T-cell	chr7	133164812	GRCh37
494	CD8+ T-cell	chr10	103662158	GRCh37
495	CD8+ T-cell	chr7	157462198	GRCh37
496	CD8+ T-cell	chr3	52243884	GRCh37
497	CD8+ T-cell	chr22	47026789	GRCh37
498	CD8+ T-cell	chr19	35807965	GRCh37
499	CD8+ T-cell	chr19	18601544	GRCh37
500	CD8+ T-cell	chr14	74067568	GRCh37
1	Monocyte	chr16	53491884	GRCh37
2	Monocyte	chr4	154443190	GRCh37
3	Monocyte	chr4	154443211	GRCh37
4	Monocyte	chr10	26757884	GRCh37
5	Monocyte	chr11	47247865	GRCh37
6	Monocyte	chr19	32844255	GRCh37
7	Monocyte	chr1	204540360	GRCh37
8	Monocyte	chr16	14628624	GRCh37
9	Monocyte	chr10	7478511	GRCh37
10	Monocyte	chr18	21119094	GRCh37
11	Monocyte	chr11	17119418	GRCh37
12	Monocyte	chr1	179266534	GRCh37
13	Monocyte	chr1	86831889	GRCh37
14	Monocyte	chr10	102016607	GRCh37
15	Monocyte	chr2	240528253	GRCh37
16	Monocyte	chr19	54353552	GRCh37
17	Monocyte	chr17	2342434	GRCh37
18	Monocyte	chr18	11885892	GRCh37
19	Monocyte	chr11	9524111	GRCh37
20	Monocyte	chr17	47911237	GRCh37
21	Monocyte	chr6	26379706	GRCh37
22	Monocyte	chr9	80804611	GRCh37
23	Monocyte	chr7	75990147	GRCh37
24	Monocyte	chr3	39289801	GRCh37
25	Monocyte	chr2	12088378	GRCh37
26	Monocyte	chr12	22830565	GRCh37
27	Monocyte	chr2	240582799	GRCh37
28	Monocyte	chr2	75034414	GRCh37
29	Monocyte	chr19	16778028	GRCh37
30	Monocyte	chr3	50664954	GRCh37
31	Monocyte	chr8	623400	GRCh37
32	Monocyte	chr18	11885449	GRCh37
33	Monocyte	chr2	85281087	GRCh37
34	Monocyte	chr14	69610354	GRCh37
35	Monocyte	chr13	113926944	GRCh37
36	Monocyte	chr4	82617914	GRCh37
37	Monocyte	chr3	121776767	GRCh37
38	Monocyte	chr9	89379275	GRCh37
39	Monocyte	chr9	2138700	GRCh37
40	Monocyte	chr8	37763358	GRCh37
41	Monocyte	chr2	27011834	GRCh37
42	Monocyte	chr8	28925190	GRCh37
43	Monocyte	chr1	117158224	GRCh37
44	Monocyte	chr5	167210590	GRCh37
45	Monocyte	chr8	42958913	GRCh37
46	Monocyte	chr2	128036920	GRCh37
47	Monocyte	chr6	133006302	GRCh37
48	Monocyte	chr20	20534723	GRCh37
49	Monocyte	chr12	49613312	GRCh37
50	Monocyte	chr2	134866103	GRCh37
51	Monocyte	chr18	60482681	GRCh37
52	Monocyte	chr12	14405674	GRCh37
53	Monocyte	chr6	5028871	GRCh37
54	Monocyte	chr2	47299631	GRCh37
55	Monocyte	chr3	59318716	GRCh37
56	Monocyte	chr10	52218276	GRCh37
57	Monocyte	chr16	21665002	GRCh37
58	Monocyte	chr16	88855854	GRCh37
59	Monocyte	chr19	40870044	GRCh37
60	Monocyte	chr6	106603616	GRCh37
61	Monocyte	chr20	596495	GRCh37
62	Monocyte	chr17	67094990	GRCh37
63	Monocyte	chr2	69675752	GRCh37
64	Monocyte	chr10	74250855	GRCh37
65	Monocyte	chr11	126184057	GRCh37
66	Monocyte	chr1	160833846	GRCh37
67	Monocyte	chr1	231746300	GRCh37
68	Monocyte	chr2	170834197	GRCh37
69	Monocyte	chr13	113926947	GRCh37
70	Monocyte	chr12	12222930	GRCh37
71	Monocyte	chr8	623373	GRCh37
72	Monocyte	chr17	75423972	GRCh37
73	Monocyte	chr1	40299836	GRCh37
74	Monocyte	chr18	22021437	GRCh37
75	Monocyte	chr17	67094139	GRCh37
76	Monocyte	chr10	12146246	GRCh37
77	Monocyte	chr4	170361745	GRCh37
78	Monocyte	chr13	46977864	GRCh37
79	Monocyte	chr13	42723399	GRCh37
80	Monocyte	chr6	109144969	GRCh37
81	Monocyte	chr1	221898349	GRCh37
82	Monocyte	chr3	37814435	GRCh37
83	Monocyte	chr2	29416793	GRCh37
84	Monocyte	chr4	40100892	GRCh37
85	Monocyte	chr3	58461603	GRCh37
86	Monocyte	chr9	99108860	GRCh37
87	Monocyte	chr11	32055226	GRCh37
88	Monocyte	chr9	102818979	GRCh37
89	Monocyte	chr16	2843198	GRCh37
90	Monocyte	chr11	94223135	GRCh37
91	Monocyte	chr2	160966034	GRCh37
92	Monocyte	chr6	106603609	GRCh37
93	Monocyte	chr12	48730156	GRCh37
94	Monocyte	chr15	69899802	GRCh37
95	Monocyte	chr8	91021034	GRCh37
96	Monocyte	chr5	142156118	GRCh37
97	Monocyte	chr7	151493633	GRCh37
98	Monocyte	chr7	2814780	GRCh37
99	Monocyte	chr3	176682815	GRCh37
100	Monocyte	chr15	69460913	GRCh37
101	Monocyte	chr13	76059196	GRCh37
102	Monocyte	chr16	31127764	GRCh37
103	Monocyte	chr8	42958805	GRCh37
104	Monocyte	chr3	187476271	GRCh37
105	Monocyte	chr12	105142754	GRCh37
106	Monocyte	chr3	59320159	GRCh37
107	Monocyte	chr1	236143882	GRCh37
108	Monocyte	chr16	2585731	GRCh37
109	Monocyte	chr4	141619173	GRCh37
110	Monocyte	chr17	76078897	GRCh37
111	Monocyte	chr20	2815519	GRCh37
112	Monocyte	chr12	64990698	GRCh37
113	Monocyte	chr2	240124229	GRCh37
114	Monocyte	chr8	67697378	GRCh37
115	Monocyte	chr14	69065402	GRCh37
116	Monocyte	chr2	8417289	GRCh37
117	Monocyte	chr3	97676699	GRCh37
118	Monocyte	chr18	9753993	GRCh37
119	Monocyte	chr7	127473537	GRCh37
120	Monocyte	chr4	154443645	GRCh37
121	Monocyte	chr5	167210588	GRCh37
122	Monocyte	chr19	16958513	GRCh37
123	Monocyte	chr11	62265158	GRCh37
124	Monocyte	chr7	27379990	GRCh37
125	Monocyte	chr1	207346581	GRCh37
126	Monocyte	chr16	28118377	GRCh37
127	Monocyte	chr22	40801424	GRCh37
128	Monocyte	chr10	43908978	GRCh37
129	Monocyte	chr7	155086051	GRCh37
130	Monocyte	chr11	110852662	GRCh37
131	Monocyte	chr4	170361789	GRCh37
132	Monocyte	chr15	69899809	GRCh37
133	Monocyte	chr5	55068033	GRCh37
134	Monocyte	chr9	35844344	GRCh37
135	Monocyte	chr13	99838421	GRCh37
136	Monocyte	chr16	21670480	GRCh37
137	Monocyte	chr19	14534854	GRCh37
138	Monocyte	chr6	4688796	GRCh37
139	Monocyte	chr7	106668899	GRCh37
140	Monocyte	chr14	93600363	GRCh37
141	Monocyte	chr9	80803134	GRCh37
142	Monocyte	chr2	152962299	GRCh37
143	Monocyte	chr9	80804607	GRCh37
144	Monocyte	chr1	17371981	GRCh37
145	Monocyte	chr20	35633539	GRCh37
146	Monocyte	chr20	4767928	GRCh37
147	Monocyte	chr5	86414081	GRCh37
148	Monocyte	chr10	77267358	GRCh37
149	Monocyte	chr21	30591491	GRCh37
150	Monocyte	chr16	17413549	GRCh37
151	Monocyte	chr7	151493629	GRCh37
152	Monocyte	chr3	53781007	GRCh37
153	Monocyte	chr3	185367177	GRCh37
154	Monocyte	chr7	37132181	GRCh37
155	Monocyte	chr20	36773884	GRCh37
156	Monocyte	chr14	103909521	GRCh37
157	Monocyte	chr5	82453147	GRCh37
158	Monocyte	chr9	904898	GRCh37
159	Monocyte	chr2	85726557	GRCh37
160	Monocyte	chr4	1220862	GRCh37
161	Monocyte	chr22	30197053	GRCh37
162	Monocyte	chr6	36612477	GRCh37
163	Monocyte	chr3	53781005	GRCh37
164	Monocyte	chr5	59367852	GRCh37
165	Monocyte	chr9	138958894	GRCh37
166	Monocyte	chr6	35331183	GRCh37
167	Monocyte	chr18	11885902	GRCh37
168	Monocyte	chr8	48297047	GRCh37
169	Monocyte	chr14	102320071	GRCh37
170	Monocyte	chr19	1901501	GRCh37
171	Monocyte	chr9	98902116	GRCh37
172	Monocyte	chr1	93147802	GRCh37
173	Monocyte	chr10	61599817	GRCh37
174	Monocyte	chr19	54353568	GRCh37
175	Monocyte	chr12	63270766	GRCh37
176	Monocyte	chr16	3597354	GRCh37
177	Monocyte	chr11	73266004	GRCh37
178	Monocyte	chr10	74303767	GRCh37
179	Monocyte	chr17	65160926	GRCh37
180	Monocyte	chr3	136345470	GRCh37
181	Monocyte	chr2	228699797	GRCh37
182	Monocyte	chr4	35726540	GRCh37
183	Monocyte	chr2	36792270	GRCh37
184	Monocyte	chrX	2848208	GRCh37
185	Monocyte	chr16	28152773	GRCh37
186	Monocyte	chr13	28954646	GRCh37
187	Monocyte	chr4	154557068	GRCh37
188	Monocyte	chr9	80802040	GRCh37
189	Monocyte	chr10	80720566	GRCh37
190	Monocyte	chr9	111707181	GRCh37
191	Monocyte	chr7	134129567	GRCh37
192	Monocyte	chr12	56576265	GRCh37
193	Monocyte	chr2	65107929	GRCh37
194	Monocyte	chr11	17120511	GRCh37
195	Monocyte	chr13	114800246	GRCh37
196	Monocyte	chr3	45413257	GRCh37
197	Monocyte	chr11	17120545	GRCh37
198	Monocyte	chr2	158272361	GRCh37
199	Monocyte	chr19	4691466	GRCh37
200	Monocyte	chr3	52450054	GRCh37
201	Monocyte	chr12	75863995	GRCh37
202	Monocyte	chr2	100404993	GRCh37
203	Monocyte	chr3	37814438	GRCh37
204	Monocyte	chr11	116913905	GRCh37
205	Monocyte	chr7	155561892	GRCh37
206	Monocyte	chr12	70590536	GRCh37
207	Monocyte	chr16	78399161	GRCh37
208	Monocyte	chr12	57556672	GRCh37
209	Monocyte	chr11	64163228	GRCh37
210	Monocyte	chr2	64510192	GRCh37
211	Monocyte	chr17	57846601	GRCh37
212	Monocyte	chr18	11885417	GRCh37
213	Monocyte	chr15	41667002	GRCh37
214	Monocyte	chr5	83901229	GRCh37
215	Monocyte	chr12	106730550	GRCh37
216	Monocyte	chr3	177006791	GRCh37
217	Monocyte	chr8	42813033	GRCh37
218	Monocyte	chr6	157699011	GRCh37
219	Monocyte	chr4	6775957	GRCh37
220	Monocyte	chr5	156995261	GRCh37
221	Monocyte	chr13	79214866	GRCh37
222	Monocyte	chr7	1130710	GRCh37
223	Monocyte	chr16	4732372	GRCh37
224	Monocyte	chr4	1220668	GRCh37
225	Monocyte	chr18	9322697	GRCh37
226	Monocyte	chr1	235298933	GRCh37
227	Monocyte	chr19	7450096	GRCh37
228	Monocyte	chr1	162889062	GRCh37
229	Monocyte	chr1	15051265	GRCh37
230	Monocyte	chr6	144338356	GRCh37
231	Monocyte	chr20	36628510	GRCh37
232	Monocyte	chr22	30197066	GRCh37
233	Monocyte	chr14	89671686	GRCh37
234	Monocyte	chr6	127674670	GRCh37
235	Monocyte	chr17	73085173	GRCh37
236	Monocyte	chr12	55030388	GRCh37
237	Monocyte	chr8	113514814	GRCh37
238	Monocyte	chr11	40108276	GRCh37
239	Monocyte	chr16	84102911	GRCh37
240	Monocyte	chr1	180052970	GRCh37
241	Monocyte	chr3	52961137	GRCh37
242	Monocyte	chr8	133857882	GRCh37
243	Monocyte	chr2	8875619	GRCh37
244	Monocyte	chr5	148120062	GRCh37
245	Monocyte	chr2	206426310	GRCh37
246	Monocyte	chr11	14735947	GRCh37
247	Monocyte	chr5	14492375	GRCh37
248	Monocyte	chr17	4748423	GRCh37
249	Monocyte	chr2	209037611	GRCh37
250	Monocyte	chr16	107868	GRCh37
251	Monocyte	chr3	33462083	GRCh37
252	Monocyte	chr16	84104914	GRCh37
253	Monocyte	chr16	21665159	GRCh37
254	Monocyte	chr16	72968586	GRCh37
255	Monocyte	chr12	687229	GRCh37
256	Monocyte	chr14	75651163	GRCh37
257	Monocyte	chr5	55068017	GRCh37
258	Monocyte	chr10	61599833	GRCh37
259	Monocyte	chr1	211779191	GRCh37
260	Monocyte	chr6	11771353	GRCh37
261	Monocyte	chr8	66934674	GRCh37
262	Monocyte	chr6	148945460	GRCh37
263	Monocyte	chr11	134021529	GRCh37
264	Monocyte	chr11	63401556	GRCh37
265	Monocyte	chr8	42958981	GRCh37
266	Monocyte	chr13	108957010	GRCh37
267	Monocyte	chr3	105071533	GRCh37
268	Monocyte	chr1	222148533	GRCh37
269	Monocyte	chr3	129208782	GRCh37
270	Monocyte	chr1	171714174	GRCh37
271	Monocyte	chr3	139290279	GRCh37
272	Monocyte	chr20	35550529	GRCh37
273	Monocyte	chr4	82063962	GRCh37
274	Monocyte	chr17	73289183	GRCh37
275	Monocyte	chr20	47712606	GRCh37
276	Monocyte	chr2	225899416	GRCh37
277	Monocyte	chr3	58473007	GRCh37
278	Monocyte	chr11	121508479	GRCh37
279	Monocyte	chr14	61573277	GRCh37
280	Monocyte	chr16	4732434	GRCh37
281	Monocyte	chr7	155086060	GRCh37
282	Monocyte	chr20	19955576	GRCh37
283	Monocyte	chr20	10432382	GRCh37
284	Monocyte	chr2	21553458	GRCh37
285	Monocyte	chr19	50530275	GRCh37
286	Monocyte	chr2	159456744	GRCh37
287	Monocyte	chr17	2341920	GRCh37
288	Monocyte	chr2	88468070	GRCh37
289	Monocyte	chr10	4863095	GRCh37
290	Monocyte	chr6	42406829	GRCh37
291	Monocyte	chr16	4732357	GRCh37
292	Monocyte	chr4	37630765	GRCh37
293	Monocyte	chr2	68925480	GRCh37
294	Monocyte	chr8	619663	GRCh37
295	Monocyte	chr20	47459683	GRCh37
296	Monocyte	chr1	40299674	GRCh37
297	Monocyte	chr3	46057861	GRCh37
298	Monocyte	chr21	44822277	GRCh37
299	Monocyte	chr4	169804197	GRCh37
300	Monocyte	chr15	75325498	GRCh37
301	Monocyte	chr10	20297209	GRCh37
302	Monocyte	chr1	157329349	GRCh37
303	Monocyte	chr2	119727750	GRCh37
304	Monocyte	chr20	44835485	GRCh37
305	Monocyte	chr6	140883000	GRCh37
306	Monocyte	chr3	45725369	GRCh37
307	Monocyte	chr16	3597075	GRCh37
308	Monocyte	chr19	14348785	GRCh37
309	Monocyte	chr3	57968166	GRCh37
310	Monocyte	chr1	180985950	GRCh37
311	Monocyte	chr10	93898495	GRCh37
312	Monocyte	chr16	87588779	GRCh37
313	Monocyte	chr2	29416646	GRCh37
314	Monocyte	chr6	106603595	GRCh37
315	Monocyte	chr9	138958992	GRCh37
316	Monocyte	chr5	55960087	GRCh37
317	Monocyte	chr7	155086082	GRCh37
318	Monocyte	chr3	58303607	GRCh37
319	Monocyte	chr4	57311367	GRCh37
320	Monocyte	chr16	68919208	GRCh37
321	Monocyte	chr1	235298790	GRCh37
322	Monocyte	chr4	110910455	GRCh37
323	Monocyte	chr15	80399205	GRCh37
324	Monocyte	chr17	57846546	GRCh37
325	Monocyte	chr9	109978410	GRCh37
326	Monocyte	chr11	47555666	GRCh37
327	Monocyte	chr11	512788	GRCh37
328	Monocyte	chr22	39890855	GRCh37
329	Monocyte	chr10	95240630	GRCh37
330	Monocyte	chr3	127962383	GRCh37
331	Monocyte	chr7	152459389	GRCh37
332	Monocyte	chr10	73621393	GRCh37
333	Monocyte	chr14	55375935	GRCh37
334	Monocyte	chr4	1327325	GRCh37
335	Monocyte	chr3	128135825	GRCh37
336	Monocyte	chr6	90685843	GRCh37
337	Monocyte	chr21	27336479	GRCh37
338	Monocyte	chr6	118902744	GRCh37
339	Monocyte	chr21	44822286	GRCh37
340	Monocyte	chr17	7022733	GRCh37
341	Monocyte	chr19	52314882	GRCh37
342	Monocyte	chr4	41517310	GRCh37
343	Monocyte	chr8	131156242	GRCh37
344	Monocyte	chr4	154443362	GRCh37
345	Monocyte	chr3	172266317	GRCh37
346	Monocyte	chr17	7847801	GRCh37
347	Monocyte	chr9	75055155	GRCh37
348	Monocyte	chr6	15489882	GRCh37
349	Monocyte	chr6	125698921	GRCh37
350	Monocyte	chr3	107706432	GRCh37
351	Monocyte	chr3	114998623	GRCh37
352	Monocyte	chr12	1033044	GRCh37
353	Monocyte	chr14	68167324	GRCh37
354	Monocyte	chr3	194051423	GRCh37
355	Monocyte	chr11	34070756	GRCh37
356	Monocyte	chr5	79699930	GRCh37
357	Monocyte	chr13	114800222	GRCh37
358	Monocyte	chr5	17382416	GRCh37
359	Monocyte	chr16	30490267	GRCh37
360	Monocyte	chr2	232188287	GRCh37
361	Monocyte	chr14	92633343	GRCh37
362	Monocyte	chr13	31230844	GRCh37
363	Monocyte	chr17	583894	GRCh37
364	Monocyte	chr8	95219542	GRCh37
365	Monocyte	chr12	112578051	GRCh37
366	Monocyte	chr9	113119208	GRCh37
367	Monocyte	chr11	108422338	GRCh37
368	Monocyte	chr6	15530899	GRCh37
369	Monocyte	chr1	165643854	GRCh37
370	Monocyte	chr19	45417337	GRCh37
371	Monocyte	chr1	150748041	GRCh37
372	Monocyte	chr6	14919936	GRCh37
373	Monocyte	chr1	179310483	GRCh37
374	Monocyte	chr11	128600902	GRCh37
375	Monocyte	chr2	203709251	GRCh37
376	Monocyte	chr1	41065546	GRCh37
377	Monocyte	chr3	100240296	GRCh37
378	Monocyte	chr17	38491802	GRCh37
379	Monocyte	chr6	112264555	GRCh37
380	Monocyte	chr1	222148526	GRCh37
381	Monocyte	chr3	194663460	GRCh37
382	Monocyte	chr3	107686797	GRCh37
383	Monocyte	chr18	11885463	GRCh37
384	Monocyte	chr7	599072	GRCh37
385	Monocyte	chr4	41517312	GRCh37
386	Monocyte	chr15	64361610	GRCh37
387	Monocyte	chr6	74164202	GRCh37
388	Monocyte	chr17	61838441	GRCh37
389	Monocyte	chr18	43236858	GRCh37
390	Monocyte	chr13	76115757	GRCh37
391	Monocyte	chr13	20780568	GRCh37
392	Monocyte	chr2	32839490	GRCh37
393	Monocyte	chr8	22920688	GRCh37
394	Monocyte	chr9	109978402	GRCh37
395	Monocyte	chr12	56070316	GRCh37
396	Monocyte	chr17	57356422	GRCh37
397	Monocyte	chr5	156960924	GRCh37
398	Monocyte	chr15	67344169	GRCh37
399	Monocyte	chr1	150769216	GRCh37
400	Monocyte	chr10	65236424	GRCh37
401	Monocyte	chr3	58461620	GRCh37
402	Monocyte	chr12	83251456	GRCh37
403	Monocyte	chr17	72779428	GRCh37
404	Monocyte	chr9	138959054	GRCh37
405	Monocyte	chr1	28106463	GRCh37
406	Monocyte	chr19	52318573	GRCh37
407	Monocyte	chr2	204291988	GRCh37
408	Monocyte	chr14	93191083	GRCh37
409	Monocyte	chr20	47328379	GRCh37
410	Monocyte	chr10	86123231	GRCh37
411	Monocyte	chr10	31914648	GRCh37
412	Monocyte	chr1	26258090	GRCh37
413	Monocyte	chr17	17053238	GRCh37
414	Monocyte	chr3	39289817	GRCh37
415	Monocyte	chr4	54868202	GRCh37
416	Monocyte	chr22	44525163	GRCh37
417	Monocyte	chr4	2805716	GRCh37
418	Monocyte	chr5	108990395	GRCh37
419	Monocyte	chr18	3881500	GRCh37
420	Monocyte	chr6	11770778	GRCh37
421	Monocyte	chr3	160104840	GRCh37
422	Monocyte	chr3	185367388	GRCh37
423	Monocyte	chr9	138958960	GRCh37
424	Monocyte	chr6	21229568	GRCh37
425	Monocyte	chr8	94892415	GRCh37
426	Monocyte	chr2	61153535	GRCh37
427	Monocyte	chr10	95505298	GRCh37
428	Monocyte	chr7	66777259	GRCh37
429	Monocyte	chr1	19702560	GRCh37
430	Monocyte	chr10	114995343	GRCh37
431	Monocyte	chr14	91825451	GRCh37
432	Monocyte	chr17	47355112	GRCh37
433	Monocyte	chr5	131939785	GRCh37
434	Monocyte	chr5	17013398	GRCh37
435	Monocyte	chr5	160265043	GRCh37
436	Monocyte	chr2	240528212	GRCh37
437	Monocyte	chr21	39651604	GRCh37
438	Monocyte	chr20	48878225	GRCh37
439	Monocyte	chr9	114722054	GRCh37
440	Monocyte	chr3	57968186	GRCh37
441	Monocyte	chr2	169028056	GRCh37
442	Monocyte	chr19	11018690	GRCh37
443	Monocyte	chr7	41877578	GRCh37
444	Monocyte	chr3	155550338	GRCh37
445	Monocyte	chr9	138959344	GRCh37
446	Monocyte	chr18	77054391	GRCh37
447	Monocyte	chr7	116648202	GRCh37
448	Monocyte	chr2	26239422	GRCh37
449	Monocyte	chr6	135576389	GRCh37
450	Monocyte	chr11	103741626	GRCh37
451	Monocyte	chr3	144376595	GRCh37
452	Monocyte	chr22	45609003	GRCh37
453	Monocyte	chr11	105893952	GRCh37
454	Monocyte	chr16	84603750	GRCh37
455	Monocyte	chr3	133708838	GRCh37
456	Monocyte	chr12	125045196	GRCh37
457	Monocyte	chr2	113969414	GRCh37
458	Monocyte	chr2	47300981	GRCh37
459	Monocyte	chr10	4560166	GRCh37
460	Monocyte	chr1	109915071	GRCh37
461	Monocyte	chr12	65211109	GRCh37
462	Monocyte	chr1	161053592	GRCh37
463	Monocyte	chr4	85604389	GRCh37
464	Monocyte	chr8	131156240	GRCh37
465	Monocyte	chr12	59969507	GRCh37
466	Monocyte	chr16	87589305	GRCh37
467	Monocyte	chr3	48569467	GRCh37
468	Monocyte	chr8	59576672	GRCh37
469	Monocyte	chr17	25821922	GRCh37
470	Monocyte	chr19	14223532	GRCh37
471	Monocyte	chr20	3415208	GRCh37
472	Monocyte	chr6	35331166	GRCh37
473	Monocyte	chr4	1328235	GRCh37
474	Monocyte	chr7	106499252	GRCh37
475	Monocyte	chr15	66673632	GRCh37
476	Monocyte	chr20	16299095	GRCh37
477	Monocyte	chr15	93581173	GRCh37
478	Monocyte	chr22	50306189	GRCh37
479	Monocyte	chr9	80803114	GRCh37
480	Monocyte	chr16	66650502	GRCh37
481	Monocyte	chr11	112400240	GRCh37
482	Monocyte	chr18	9798480	GRCh37
483	Monocyte	chr5	132643761	GRCh37
484	Monocyte	chr17	44762883	GRCh37
485	Monocyte	chr9	99805261	GRCh37
486	Monocyte	chr2	69033875	GRCh37
487	Monocyte	chr2	196378053	GRCh37
488	Monocyte	chr17	47674905	GRCh37
489	Monocyte	chr16	89625694	GRCh37
490	Monocyte	chr22	33118599	GRCh37
491	Monocyte	chr2	16183252	GRCh37
492	Monocyte	chr10	6599412	GRCh37
493	Monocyte	chr9	100216165	GRCh37
494	Monocyte	chr2	40010750	GRCh37
495	Monocyte	chr20	20248911	GRCh37
496	Monocyte	chr13	108957020	GRCh37
497	Monocyte	chr3	28417989	GRCh37
498	Monocyte	chr6	109669654	GRCh37
499	Monocyte	chr3	45205701	GRCh37
[truncated: 1,001 more rows]
